# Measuring protected-area outcomes with leech iDNA: large-scale quantification of vertebrate biodiversity in Ailaoshan reserve

Yinqiu Ji<sup>1,\*</sup>, Christopher CM Baker<sup>2,\*,\*\*</sup>, Viorel D Popescu<sup>3,4</sup>, Jiaxin Wang<sup>1</sup>, Chunying Wu<sup>1</sup>,  
Zhengyang Wang<sup>2</sup>, Yuanheng Li<sup>1,2</sup>, Lin Wang<sup>5,6</sup>, Chaolang Hua<sup>7</sup>, Zhongxing Yang<sup>7</sup>, Chunyan  
Yang<sup>1</sup>, Charles CY Xu<sup>8</sup>, Qingzhong Wen<sup>7</sup>, Naomi E Pierce<sup>2,\*\*,\*</sup>, and Douglas W Yu<sup>1,9,10\*\*</sup>

<sup>1</sup>State Key Laboratory of Genetic Resources and Evolution, Kunming Institute of Zoology, 32 Jiaochang  
Dong Lu, Kunming, Yunnan 650223 China

<sup>2</sup>Department of Organismic and Evolutionary Biology, Harvard University, 26 Oxford Street, Cambridge  
MA 02138 USA

<sup>3</sup>Department of Biological Sciences and Sustainability Studies Theme, 107 Irvine Hall, Ohio University,  
Athens OH 45701 USA

<sup>4</sup>Center for Environmental Studies (CCMESI), University of Bucharest, 1 N. Balcescu Blvd., Bucharest,  
Romania

<sup>5</sup>Center for Integrative Conservation, Xishuangbanna Tropical Botanical Garden, Chinese Academy of  
Sciences, Mengla 666303, China

<sup>6</sup>Center of Conservation Biology, Core Botanical Gardens, Chinese Academy of Sciences, Mengla 666303,  
China

<sup>7</sup>Yunnan Institute of Forest Inventory and Planning, 289 Renmin E Rd, Kunming Yunnan 650028 China

<sup>8</sup>Redpath Museum and Department of Biology, McGill University, 859 Sherbrooke Street West, Montreal,  
PQ H3A2K6 Canada

<sup>9</sup>Center for Excellence in Animal Evolution and Genetics, Chinese Academy of Sciences, Kunming  
Yunnan, 650201 China

<sup>10</sup>School of Biological Sciences, University of East Anglia, Norwich Research Park, Norwich, Norfolk  
NR47TJ, UK

\*These authors contributed equally to this work.

\*\*Corresponding authors. CCMB: bakerccm@gmail.com; NEP: npierce@oeb.harvard.edu;  
DWY: dougwyu@mac.com

Keywords: environmental DNA, leech iDNA, metabarcoding, occupancy model, Yunnan  
China, monitoring, conservation, biodiversity, outcome evaluation, area-based conservation,  
bushmeat, wild meat, Aichi Biodiversity Targets

## 1 Abstract

Protected areas are central to meeting biodiversity conservation goals, but measuring their  
effectiveness is challenging. We address this challenge by using DNA from leech-ingested  
bloodmeals to estimate vertebrate occupancies across the 677 km<sup>2</sup> Ailaoshan reserve in Yun-  
nan, China. 163 park rangers collected 30,468 leeches from 172 patrol areas. We identified  
86 vertebrate species, including amphibians, mammals, birds, and squamates. Multi-species  
occupancy modelling showed that species richness increased with elevation and distance to  
reserve edge, including the distributions of most of the large mammals (e.g. sambar, black

40 bear, serow, tufted deer). The exceptions were the three domestic mammal species (cows,  
41 sheep, goats) and muntjak deer, which were more common at lower elevations. Vertebrate  
42 occupancies are a granular, large-scale conservation-outcome measure that can be used to  
43 increase management effectiveness and thus to improve the contributions that protected  
44 areas make to achieving global biodiversity goals.

45 建立自然保护区是实现生物多样性保护的核心措施，然而如何评估其保护效率仍然是一  
46 个难题。为了解决这一难题，我们首次利用蚂蝗吸食血液中的DNA (iDNA) 进行了一次  
47 大规模的尝试，对占地677平方公里的位于中国西南部云南省的哀牢山自然保护区进  
48 行了一个全局的脊椎动物多样性的评估。在本研究中，该保护区被划分成172个巡逻区，  
49 由163位护林员在巡视过程中采集了总共30468只蚂蝗，在这些蚂蝗的测序数据中，我们鉴  
50 定得到86个脊椎动物物种，包括两栖类，鸟类，哺乳类，爬行类。我们的多物种占据模型  
51 分析结果显示：在群落水平，物种丰富度和群落的平均分布随着海拔的升高而增加，随着  
52 与保护区边缘的距离的缩短而减少；而在物种水平，三个家养动物物种（牛，绵羊，山  
53 羊）和一个野生动物物种（赤麂）在海拔较低的靠近保护区边缘的地区分布更多，而绝大  
54 多数大型野生哺乳动物（如水鹿，黑熊，苏门羚，黑麂，野猪）则呈现相反的趋势，在较  
55 高海拔，靠近保护区中央的地区分布更多。本研究的结果显示基于蚂蝗的iDNA技术可以为  
56 评估自然保护区对脊椎动物的保护效率创建一个高效的，可重复的，易于被大众接受理解  
57 的，并且可以被审计的结果指标，该指标可以用于评估保护区对脊椎动物多样性的保护效  
58 率，从而确保保护区有助于实现全球生物多样性目标。

## 59 2 Introduction

60 *The difficulty of measuring the effectiveness of protected areas.* In 2010, the signatories  
61 to the Convention on Biological Diversity, including China, agreed to the twenty 2011-2020  
62 Aichi Biodiversity Targets [1]. Aichi Target 11 concerns the safeguarding of biodiversity,  
63 and sets the goal of placing (A) 17% of terrestrial and inland water habitats in a system  
64 of protected areas (e.g. national parks and other nature reserves) that is (B) ecologically  
65 representative, (C) well-connected, (D) equitably managed, and (E) effective. The world  
66 has nearly achieved goal A, with 15% of global land area now under national jurisdiction  
67 [2–4]. China has to date also placed 15% (1.43 million km<sup>2</sup>) of its land surface into nature  
68 reserves [5, 6]. Moreover, Wu *et al.* [7] have shown that, at least in western China, the  
69 reserve system covers most ecoregions, biodiversity priority areas, and natural vegetation  
70 types (goal B), and Ren *et al.* [8] have used time-series analyses of Landsat imagery to show  
71 that China’s national-level nature reserves successfully prevent deforestation (goal E). China  
72 has therefore already demonstrated some considerable institutional capacity for achieving  
73 Aichi Target 11.

74 In southern and eastern China, however, the ecological representativeness of reserves is low  
75 (goal B) [9], many reserves are isolated (goal C) [7], there is little information on the impact  
76 of the reserves on local human populations (goal D) and, most importantly, *we know little*  
77 *about whether the reserves are effective at protecting the species that live inside them* (goal  
78 E). Our focus in this study is thus goal E, *reserve effectiveness*, because if reserves fail to  
79 protect their biodiversity endowments, the other goals do not matter [2, 3, 10–12].

80 The challenge of measuring the effectiveness of protected areas is not unique to China. In  
81 fact, around the world, it is so difficult to do that whether area-based conservation efforts  
82 are successfully achieving positive biodiversity outcomes is currently deemed ‘unknown’ [4].

83 Instead, indirect measures of reserve effectiveness, such as evaluations of staffing and bud-  
84 get adequacy ('input evaluation' [4]), or evaluations of biodiversity threats like pollution  
85 and human pressures ('threat-reduction evaluation' [4]), are used to estimate the aggregate  
86 effectiveness of reserves, especially where they can take advantage of high-throughput tech-  
87 nologies such as remote sensing [2, 4, 10, 13]. However, indirect measures must assume that  
88 the deployment of management inputs and/or the reduction of known threats successfully  
89 result in positive biodiversity outcomes [4], are unable to detect if conservation outcomes  
90 differ across taxa, nor can they efficiently detect new threats.

91 Thus, we ask here whether we can quantify the distribution and abundance of vertebrate bio-  
92 diversity on a scale large enough for use as a *direct* measure of protected-area conservation  
93 outcome. We focus on vertebrates (mammals, birds, amphibians, and squamates) because  
94 one of the most important threats to vertebrate populations in China is overexploitation  
95 [14], which is undetectable using remote-sensing methods and thus especially difficult to  
96 measure. Measures of conservation outcome should also be *repeatable*, *granular*, *auditable*,  
97 *understandable*, and *efficient*. In other words, it should be possible for biodiversity assess-  
98 ments to be updated frequently over large areas (*repeatable*) and with high spatial, temporal,  
99 and taxonomic resolution (*granular*), so that management can quickly detect and locate dif-  
100 ferent kinds of change and diagnose their likely causes. Timely and informative measures  
101 of change can then be used to direct and incentivize effective management (e.g. through  
102 salaries and promotions). It should also be possible for assessments to be validated rigor-  
103 ously by third parties such as courts and the public (*auditable* and *understandable*), which  
104 is necessary for dispute resolution and legitimacy. Finally, conservation-outcome measures  
105 should of course be *efficient* to generate [15–17].

106 *Emerging technologies for surveying vertebrate biodiversity at broad spatial scales.* Ad-  
107 vances in and increased availability of technologies such as camera traps, bioacoustics, and  
108 environmental DNA (eDNA) generate large numbers of species detections. In particular,  
109 camera traps (and increasingly, bioacoustics) have shown great promise for developing bio-  
110 diversity indicators that meet the requirements of the Convention for Biological Diversity  
111 for broad-scale biodiversity monitoring [12, 18–22]. However, the costs of buying, deploying  
112 and monitoring camera traps places limitations on the area that they can monitor. For  
113 example, Beaudrot *et al.* [12] recently reported that multi-year camera-trap surveys of 511  
114 populations of terrestrial mammals and birds in fifteen tropical-forest protected areas did  
115 not detect “systematic declines in biodiversity (i.e. occupancy, richness, or evenness).” How-  
116 ever, while their camera-trap sets covered between 140 and 320 km<sup>2</sup> in each protected area,  
117 this represented only 1-2% of the largest parks in their dataset, the obvious reason being the  
118 difficulty and expense of setting up and maintaining a camera-trap network to cover large,  
119 difficult-to-access areas, exacerbated by theft and vandalism in some settings [22, 23]. Fur-  
120 thermore, both camera traps and acoustic recorders may miss large portions of vertebrate  
121 species diversity. For example, amphibians, squamates, and many birds are not readily (if  
122 ever) captured on camera traps, and many mammals, amphibians, and squamates may be  
123 missed via bioacoustic monitoring.

124 As such, eDNA has great potential to complement camera traps and acoustic recorders  
125 [24], while circumventing some of the logistical issues with deployment and/or loss of field  
126 equipment, as well as taxonomic bias. Here, we focus on iDNA, which is a subset of eDNA  
127 [25], as an emerging sample type for broad taxonomic and spatial biodiversity monitoring.  
128 iDNA is vertebrate DNA collected by invertebrate ‘samplers,’ including haematophagous

129 parasites (leeches, mosquitoes, biting flies, ticks) and dung visitors (flies, dung beetles) [26–  
130 28]. iDNA methods are rapidly improving, with research focused on documenting the ranges  
131 of vertebrate species and their diseases that can be efficiently detected via iDNA [29–34],  
132 plus comparisons with camera trapping and other survey methods [35–37], and pipeline  
133 development [38, 39].

134 *Leech-derived iDNA.* We report a large-scale attempt to use iDNA to estimate vertebrate  
135 occupancy at the scale of an entire protected area, the Ailaoshan national-level nature  
136 reserve in Yunnan province, southwest China. Ailaoshan covers 677 km<sup>2</sup>, nearly the size of  
137 Singapore, and the Yunnan Forestry Service has previously attempted to monitor vertebrate  
138 diversity in the reserve via camera traps [40]. Our goal was to test whether it is realistic to  
139 scale up an iDNA survey within a realistic management setting, from sample collection and  
140 molecular labwork through bioinformatic processing and statistical analysis.

141 We had several reasons to test the use of leech-derived iDNA as a promising broad-scale  
142 monitoring technology. The two most important concern efficiency. First, the personnel  
143 collecting leeches do not require specialized training. The Ailaoshan reserve is divided into  
144 172 ‘patrol areas’ that are each patrolled monthly by park rangers hired from neighboring  
145 villages, whom we contracted to collect terrestrial, haematophagous leeches during their  
146 rainy-season patrols. We were thus able to sample across the reserve in three months  
147 at low cost. Second, leech sampling potentially provides an efficient way to correct for  
148 imperfect detection, which may include false negatives (i.e. failure to detect species that  
149 are actually present at a site) and false positives (i.e. detecting or appearing to detect a  
150 species’ DNA when that species is actually absent). With leeches, false negatives can arise  
151 when, for example, a species was not fed upon by leeches at a site; leeches containing that  
152 species’ DNA were not captured from that site; or the species’ DNA was not successfully  
153 amplified and associated with the correct taxon. Sources of false positives may include leech  
154 movement between sites; sample contamination in the field or lab; and errors in sequencing  
155 or bioinformatic processing.

156 Statistical models can be used to account for imperfect detection. In this project, we  
157 analyzed our DNA sequencing results using hierarchical site-occupancy models [41, 42],  
158 which distinguish between the detection of a species’ DNA at a site, and the true presence or  
159 absence of the species, which is not directly observed. The goal of site-occupancy modelling  
160 is to infer where each species is truly present, by separately estimating the probability that  
161 a species is present at a site, and the probability that a species is detected if it is present [41,  
162 43]. Separating these probabilities relies on a replicated sampling design, with replicates  
163 taken in sufficiently close spatial and/or temporal proximity that the underlying distribution  
164 of species presences or absences may be treated as fixed. We achieved *replicate samples per*  
165 *patrol area in just one patrol* by issuing each ranger with multiple, small plastic bags, each  
166 containing small tubes with preservative, inducing subsets of leeches to be stored in separate  
167 bags [28], which we processed separately.

168 A third advantage of leech-derived iDNA is the potential to yield inferences about a broad  
169 range of taxa, as leeches feed on small and large mammals, birds, squamates, and amphib-  
170 ians, including arboreal species; this provides a taxonomic breadth that is not typically  
171 captured via camera traps or bioacoustic surveys [19, 32, 33]. Also, DNA sequences can  
172 potentially distinguish some visually cryptic species [35] (although lack of species-level res-  
173 olution also occurs with iDNA sequences). Finally, leeches can yield PCR-amplifiable DNA  
174 for at least four months after their last blood meal [44], which should improve the efficiency

175 of leech iDNA by increasing the proportion of collected leeches that can yield information  
176 on their previous bloodmeal. On the other hand, leech iDNA persistence could also *decrease*  
177 the spatiotemporal resolution of vertebrate detections, since the potentially long period be-  
178 tween leech capture and its previous feed affords more opportunity for leeches or vertebrate  
179 hosts to have moved between sampling areas [28]).

180 In this study, we used metabarcoding [45] to detect vertebrate species sampled in the blood  
181 meals of wild leeches, and occupancy modelling to estimate the spatial distributions of  
182 those vertebrates throughout the Ailaoshan reserve in Yunnan Province, China. We further  
183 identified environmental factors that correlated with these distributions. We find that leech-  
184 derived iDNA data can capture plausible and useful occupancy patterns for a wide range  
185 of vertebrates, including species that are less likely to be detected with camera traps and  
186 bioacoustic surveys. We conclude that iDNA can contribute usefully to the goal of measuring  
187 the effectiveness of protected areas, by providing information on the spatial distributions and  
188 environmental correlates of vertebrate species, helping us to optimize management strategies  
189 within the reserve.

## 190 **3 Methods**

191 This section provides an overview of methods. Supplementary File S1 provides additional  
192 detailed descriptions of the leech collections, laboratory processing, bioinformatics pipeline,  
193 and site-occupancy modelling. Code for our bioinformatics pipeline is available at [46] and  
194 [47]. Code for our site-occupancy modelling and analysis is available at [48].

### 195 **3.1 Field site**

196 The long and narrow 677 km<sup>2</sup> Ailaoshan reserve runs northwest-to-southeast along a ridge-  
197 line for around 125 km (approx. 24.9°N 100.8°E to 24.0°N 101.5°E), averaging just 6 km wide  
198 along its length, with an elevation range of 422 to 3,157 m and an annual precipitation range  
199 of 1,000 to 1,860 mm, depending on altitude [49] (Figure 1a). Vegetation is subtropical, ev-  
200 ergreen broadleaf forest, and the reserve is flanked by agricultural land on lower-elevation  
201 slopes in all directions. There are 261 villages within 5 km of the reserve border [50], with  
202 an estimated human population of over 20,000. After the reserve's establishment in 1981, a  
203 1984-5 survey published a species list of 86 mammal, 323 bird, 39 (non-avian) reptile, and  
204 26 amphibian species/subspecies [51]. Although investigators have since carried out one-  
205 off targeted surveys [52–54] and individual-species studies [55–59], there has never been a  
206 synoptic survey of vertebrate biodiversity. As a result, the current statuses and population  
207 trends of vertebrate species in the park are mostly unknown.

### 208 **3.2 Leech collections**

209 Samples were collected in the rainy season, from July to September 2016, by park rangers  
210 from the Ailaoshan Forestry Bureau. The nature reserve is divided into 172 non-overlapping  
211 patrol areas defined by the Yunnan Institute of Forest Inventory and Planning. These areas  
212 range in size from 0.5 to 12.5 km<sup>2</sup> (mean 3.9 ± sd 2.5 km<sup>2</sup>), in part reflecting accessibility

213 (smaller areas tend to be more rugged). These patrol areas pre-existed our study, and  
214 are used in the administration of the reserve. The reserve is divided into 6 parts, which  
215 are managed by 6 cities or autonomous counties (NanHua, ChuXiong, JingDong, ZhenYuan,  
216 ShuangBai, XinPing) which assign patrol areas to the villages within their jurisdiction based  
217 on proximity. The villages establish working groups to carry out work within the patrol  
218 areas. Thus, individual park rangers might change every year, but the patrol areas and the  
219 villages responsible for them are fixed.

220 Each ranger was supplied with several small bags containing tubes filled with RNAlater  
221 preservative. Rangers were asked to place any leeches they could collect opportunistically  
222 during their patrols (e.g. from the ground or clothing) into the tubes, in exchange for a  
223 one-off payment of RMB 300 (~ USD 43) for participation, plus RMB 100 if they caught  
224 one or more leeches. Multiple leeches could be placed into each tube, but the small tube  
225 sizes generally required the rangers to use multiple tubes for their collections.

226 A total of 30,468 leeches were collected in 3 months by 163 rangers across all 172 patrol  
227 areas. When a bag of tubes contained < 100 total leeches, we reduced our DNA-extraction  
228 workload by pooling leeches from all tubes in the same plastic bag and treating them as  
229 one replicate. However, when a bag contained  $\geq 100$  total leeches, we selectively pooled  
230 some of the tubes in that bag to create five approximately equally sized replicates from the  
231 bag, to avoid any replicates containing an excessive number of leeches. Eighty-one per cent  
232 of bags contained < 100 leeches, and 78% of patrol areas consisted only of bags below the  
233 threshold. Each patrol area typically returned multiple replicates, in the form of multiple  
234 bags below the threshold and/or multiple tubes from the bags above the threshold. After  
235 this pooling, the mean number of leeches per replicate was 34 (range 1 to 98), for a total of  
236 893 replicates across the entire collection.

### 237 3.3 Environmental characteristics

238 We used ArcGIS Desktop 9.3 (Esri, Redlands, CA) and R v3.4.0 [60] to calculate character-  
239 istics of each patrol area from shapefiles. We created 30 m rasters for elevation, topographic  
240 position index (i.e. difference between each pixel and its surrounding pixels [61]), distance to  
241 nearest road, and distance to nearest stream. We then calculated the median of the raster  
242 values for each patrol area for use as predictors in our statistical modelling (Table 1 and  
243 Figure S1). We also calculated distance to the Ailaoshan nature-reserve edge as the distance  
244 of each patrol-area centroid to the nearest nature-reserve edge.

**Table 1:** Environmental covariates

| Variable         | Description                           | Mean $\pm$ SD   | Min   | Max   |
|------------------|---------------------------------------|-----------------|-------|-------|
| <i>elevation</i> | median elevation (m)                  | 2,510 $\pm$ 210 | 1,690 | 2,900 |
| <i>TPI</i>       | median topographic position index     | 0.6 $\pm$ 3.5   | -12.0 | 20.0  |
| <i>road</i>      | median distance to road (m)           | 840 $\pm$ 640   | 60    | 2,870 |
| <i>stream</i>    | median distance to stream (m)         | 360 $\pm$ 180   | 90    | 1,010 |
| <i>reserve</i>   | centroid distance to reserve edge (m) | 1110 $\pm$ 670  | 150   | 3,900 |

### 245 3.4 Laboratory processing

246 We extracted DNA from each replicate and then PCR-amplified two  
247 mitochondrial markers: one from the 16S rRNA (MT-RNR2) gene  
248 (primers: *16Smam1* 5'-CGGTTGGGGTGACCTCGGA-3' and *16Smam2*  
249 5'-GCTGTTATCCCTAGGGTAACT-3' [62]), and the other from the 12S  
250 rRNA (MT-RNR1) gene (primers: 5'-ACTGGGATTAGATACCCC-3' and  
251 5'-YRGAACAGGCTCCTCTAG-3' modified from [63]). We hereafter refer to these  
252 two markers as LSU (16S, 82-150 bp) and SSU (12S, 81-117 bp), respectively, referring to  
253 the ribosomal large subunit and small subunit that these genes code for. (We do this to  
254 avoid confusion with the widely used bacterial 16S gene, which is homologous to our 12S  
255 marker, rather than our 16S.) A third primer pair targeting the standard cytochrome *c*  
256 oxidase I marker [64] was tested but not adopted in this study as it co-amplified leech DNA  
257 and consequently returned few vertebrate reads.

258 The LSU primers are designed to target mammals, and the SSU primers to amplify all  
259 vertebrates. We ran `ecoPCR` v0.5 [63] on the Tetrapoda in the MIDORI database [65] to  
260 estimate expected amplification success,  $B_c$ , for our primers.  $B_c$  is the proportion of species  
261 in the reference database that can be amplified *in silico*. The *16Smam* primers returned high  
262  $B_c$  values for Mammalia (99.3%), as expected, and also for Aves (96.2%), a moderate value  
263 for Amphibia (79%), and a low value for Squamata (39.9%). The 12S primers returned  
264 high  $B_c$  values (> 98%) for Mammalia, Amphibia, and Aves, and a moderate  $B_c$  value  
265 (79.8%) for Squamata. We therefore expected most or all Ailaoshan mammals, birds, and  
266 amphibians to be amplified by one or both primers.

267 Primers were ordered with sample-identifying tag sequences, and we used a twin-tagging  
268 strategy to identify and remove 'tag jumping' errors [66] using the DAME protocol [67].  
269 From our 893 replicate tubes, we successfully PCR-amplified in triplicate 661 samples using  
270 our LSU primers and 745 samples using our SSU primers. Successful PCR amplifications  
271 were sent to Novogene (Beijing, China) for PCR-free library construction and 150 bp paired-  
272 end sequencing on an Illumina HiSeq X Ten.

273 Negative controls were included for each set of PCRs, and the PCR set was repeated, or  
274 ultimately abandoned, if agarose gels revealed contamination in the negative controls. We  
275 also sequenced the negative controls, because gels do not always detect very low levels of  
276 contamination. Sequences assigned to human, cow, dog, goat, pig, chicken, and some wild  
277 species appeared in our sequenced negative controls, but with low PCR replication and  
278 at low read number. We used these negative controls to set DAME filtering stringency in  
279 our bioinformatics pipeline (see next section and Supplementary File S1) for all samples  
280 to levels that removed these contaminants: `-y 2` for both markers (minimum number of  
281 PCRs out of 3 in which a unique read must be present), and `-t 20` for SSU and `-t 9` for  
282 LSU (minimum number of copies per PCR at which a unique read must appear). We also  
283 amplified and sequenced a set of positive controls containing DNA from two rodent species,  
284 *Myodes glareolus* and *Apodemus flavicollis*, along with negative controls that we verified to  
285 be contamination-free using agarose gel electrophoresis. *M. glareolus* and *A. flavicollis* have  
286 European and Western Asian distributions, and we did not detect either species in our leech  
287 samples.

### 288 3.5 Bioinformatics pipeline

289 The three key features of our bioinformatics pipeline were the DAME protocol [67], which  
290 uses twin-tagging and three independent PCR replicates to identify and remove tag-jumped  
291 and erroneous reads, the use of two independent markers, which provides an independent  
292 check on taxonomic assignments (Figure S2), and the PROTAX statistical ‘wrapper’ for  
293 taxonomic assignment [68, 69], which reduces overconfidence in taxonomic assignment when  
294 reference databases are incomplete, as they always are.

295 After DAME filtering, we removed residual chimeras using VSEARCH v2.9.0 [70], clustered  
296 sequences into preliminary operational taxonomic units (‘pre-OTUs’) using Swarm v2.0 [71],  
297 and then used the R package LULU v0.1.0 [72] to merge pre-OTUs with high similarity and  
298 distribution across samples. We then used PROTAX to assign taxonomy to representative  
299 sequences from the merged pre-OTUs [38, 68, 69], in which we benefited from recent addi-  
300 tions to the mitochondrial reference database for Southeast Asian mammals [73]. The full  
301 pipeline is described in detail in Supplementary File S1 (*Assigning taxonomy to preliminary*  
302 *operational taxonomic units* and following sections). We shared taxonomic information be-  
303 tween the LSU and SSU datasets by making use of correlations between the datasets. To  
304 do this, we calculated pairwise correlations of SSU and LSU pre-OTUs across the 619 repli-  
305 cates for which both markers had been amplified and visualized the correlations as a network  
306 (Figure S2). If an LSU and an SSU pre-OTU occurred in (mostly) the same subset of repli-  
307 cates and were assigned the same higher-level taxonomies, the two pre-OTUs were deemed  
308 likely to have been amplified from the same set of leeches feeding on the same species. We  
309 manually inspected the network diagram and assigned such correlated pre-OTU pairs the  
310 same taxonomy.

311 We eliminated any pre-OTUs to which we were unable to assign a taxonomy; these pre-  
312 OTUs only accounted for 0.9% and 0.2% of reads in the LSU and SSU datasets respectively,  
313 and most likely represent sequencing errors rather than novel taxa. Within the LSU and  
314 SSU datasets, we merged pre-OTUs that had been assigned the same taxonomies, thus  
315 generating a final set of operational taxonomic units (OTUs) for each dataset. Finally, we  
316 removed the OTU identified as *Homo sapiens* from both datasets prior to analysis. Although  
317 it would be informative to map the distribution of humans across the reserve, we expect  
318 that most of the DNA came from the rangers themselves, not from other humans using the  
319 reserve.

320 Our final OTUs are intended to be interpreted as species-level groups, even though some  
321 cannot yet be assigned taxonomic names to species level (most likely due to incomplete  
322 reference databases). Thus, for example, the two frog OTUs *Kurixalus* sp1 and *Kurixalus*  
323 sp2 in the LSU dataset should be interpreted as two distinct *Kurixalus* species. Likewise, the  
324 frog OTU Megophryidae sp3 in the LSU and SSU datasets should be interpreted as a single  
325 species within Megophryidae. We therefore refer to our final OTUs as species throughout  
326 the remainder of this study.

327 After excluding humans, the final LSU and SSU datasets comprised 18,502,593 and  
328 84,951,011 reads respectively. These reads represented a total of 72 species across 740  
329 replicates and 127 patrol areas in the SSU dataset, and 59 species across 653 replicates and  
330 126 patrol areas in the LSU dataset. To assess the degree to which our iDNA approach  
331 was able to capture the breadth of vertebrate biodiversity in the park, we compared the  
332 list of species that we detected against unpublished, working species lists maintained by



333 researchers at the Kunming Institute of Zoology.

334 We also attached additional metadata to our species list: we attached International Union  
335 for Conservation of Nature (IUCN) data for individual species by using the R package  
336 `rredlist` v0.6.0 [74] to search for scientific names assigned by PROTAX. For this purpose,  
337 we treated *Capricornis milneedwardsii* as synonymous with *Capricornis sumatraensis*, in  
338 line with recent research and the latest IUCN assessment [75, 76]. For mammals, we used  
339 the PanTHERIA database [77] to obtain data on adult body mass for each species; where  
340 species-level information was not available, we used the median adult body mass from the  
341 database for the lowest taxonomic group possible.

### 342 3.6 Site-occupancy modelling

343 We estimated separate multispecies site-occupancy models [42] for the LSU and SSU  
344 datasets. The models that we used are an extension of the single-season occupancy model in  
345 [41]. For each species, the models explicitly capture (i) an ‘ecological process’ governing the  
346 (unobserved) presence or absence of the species in each patrol area; and (ii) an ‘observation  
347 process’, governing whether we detect the species’ DNA in each of our replicate samples.  
348 The ecological and observation processes for individual species are linked in our model by  
349 imposing community-level priors over the parameters that describe the processes for each  
350 species.

351 For the ecological process, each species  $i$  was assumed to be either present or absent in each  
352 patrol area  $j$ , and we used  $z_{ij}$  to denote this unobserved ecological state. We assumed the  
353  $z_{ij}$  are constant across all replicates taken from patrol area  $j$ , consistent with the samples  
354 being taken at essentially the same point in time.  $z_{ij}$  was assumed to be a Bernoulli random  
355 variable governed by an occupancy parameter  $\psi_{ij}$ , i.e. the probability that species  $i$  was  
356 present in patrol area  $j$ :

$$z_{ij} \sim \text{Bernoulli}(\psi_{ij}). \quad (1)$$

357 Note that we did not use data augmentation (see e.g. [42, 78]) to estimate the full size of  
358 the community, in order to limit the computational complexity of our occupancy model. As  
359 such, for each dataset,  $z_{ij}$  was limited to those species that were detected at least once in  
360 that dataset.

361 After model selection using the Bayesian approach of Kuo and Mallick ([79]; see Supplemen-  
362 tary File S1 for details), we modelled occupancy  $\psi_{ij}$  as a function of elevation and distance  
363 from the reserve edge in the LSU dataset

$$\text{logit}(\psi_{ij}) = \beta_{0i} + \beta_{1i} \text{elevation}_j + \beta_{2i} \text{reserve}_j \quad (2)$$

364 and as a function of elevation in the SSU dataset

$$\text{logit}(\psi_{ij}) = \beta_{0i} + \beta_{1i} \text{elevation}_j \quad (3)$$

365 where  $\text{elevation}_j$  is the median elevation for patrol area  $j$ , and  $\text{reserve}_j$  is the distance from  
366 the centroid of patrol area  $j$  to the nature reserve edge.

367 We modelled observation as a Bernoulli process assuming imperfect detection but no false  
368 positives:

$$y_{ijk} \sim \text{Bernoulli}(z_{ij} \cdot p_{ijk}), \quad (4)$$

369 where  $y_{ijk}$  is the observed data, i.e. detection or non-detection of species  $i$ 's DNA in replicate  
370  $k$  from patrol area  $j$ .

371 We allowed the conditional detection probability  $p_{ijk}$  to vary as a function of the conditional  
372 detection probability for species  $i$  per 100 leeches,  $r_i$ , and the number of leeches in the  
373 replicate,  $leeches_{jk}$ :

$$p_{ijk} = 1 - (1 - r_i)^{leeches_{jk}/100} \quad (5)$$

$$\text{logit}(r_i) = \gamma_{0i} \quad (6)$$

374 We allowed  $r_i$ , and its logit-scale equivalent  $\gamma_{0i}$ , to vary among species to capture e.g.  
375 variation in leech feeding preferences among taxa. We used  $leeches_{jk}/100$  rather than  
376  $leeches_{jk}$  to avoid computational problems arising from rounding.

377 Note that the detection probability  $p_{ijk}$  is conditional on species  $i$  being present in patrol  
378 area  $j$ , and not on species  $i$ 's DNA being present in replicate  $k$  from that site.  $p_{ijk}$  therefore  
379 subsumes multiple sources of imperfect detection, including those that result in species  $i$ 's  
380 DNA being absent from the replicate (e.g. the leeches in replicate  $k$  did not feed on species  
381  $i$ , or they did so long ago and the DNA has since been digested), as well as those that result  
382 in apparent non-detection of species  $i$  DNA when it is present (e.g. failure to PCR amplify  
383 sufficiently, PCR or sequencing errors, or problems arising during bioinformatic processing).  
384 The multiple PCRs that we performed for each replicate (see *Laboratory processing* above,  
385 and Supplementary File S1) could in principle have been used to decompose  $p_{ijk}$  into (i) a  
386 per-replicate probability that species  $i$ 's DNA is present in the replicate when the species is  
387 present at the site, and (ii) a per-PCR probability that species  $i$ 's DNA is detected when it  
388 present in the replicate, by adding another hierarchical level to our model [80–83]. However,  
389 we instead chose to combine the results from the multiple PCRs using DAME [67] prior  
390 to modelling, since DAME is specifically designed to detect and remove errors arising in  
391 PCR and sequencing, and offers filtering options specialised to this task that we found  
392 useful.

393 Finally, whereas Equations 1 through 6 define a site-occupancy model for species  $i$  alone,  
394 we united these species-specific models with a community model for both ecological and  
395 detection processes:

$$\beta_{1i} \sim N(\mu_{\beta_1}, \sigma_{\beta_1}) \quad (7)$$

$$\beta_{2i} \sim N(\mu_{\beta_2}, \sigma_{\beta_2}) \quad (\text{for the LSU model only}) \quad (8)$$

$$(\beta_{0i}, \gamma_{0i}) \sim \text{MVN}([\mu_{\beta_{0g_i}}, \mu_{\gamma_{0g_i}}], \begin{bmatrix} \sigma_{\beta_{0g_i}}^2 & \rho \sigma_{\beta_{0g_i}} \sigma_{\gamma_{0g_i}} \\ \rho \sigma_{\beta_{0g_i}} \sigma_{\gamma_{0g_i}} & \sigma_{\gamma_{0g_i}}^2 \end{bmatrix}) \quad (9)$$

396 where  $N(\cdot)$  and  $\text{MVN}(\cdot)$  denote normal and multivariate normal distributions. These dis-  
397 tributions were characterized by community hyperparameters  $\mu_{\bullet}$  and  $\sigma_{\bullet}$ , with separate  
398 distributions for each parameter as denoted by the first subscript. We used a multivariate  
399 normal prior for  $(\beta_{0i}, \gamma_{0i})$  to allow non-zero covariance between species' occupancy and de-  
400 tection probabilities, as we might expect if, for example, variation in abundance affects both  
401 probabilities [42].

402 These community models allow rare species effectively to borrow information from more  
403 common ones, producing a better overall ensemble of parameter estimates, though at the  
404 cost of shrinkage on the individual parameters [42, 84, 85]. We separated the species into two  
405 natural groupings – homeothermic mammals and birds, and poikilothermic amphibians and  
406 squamates – and allowed them to have different community distributions. This is denoted  
407 by the subscripts on the  $\mu_{\bullet}$  and  $\sigma_{\bullet}$  community hyperparameters for the occupancy and  
408 detection intercepts, in which  $g_i$  represents which of these two groupings species  $i$  belongs  
409 to. This approach reflected our expectation that these groupings would differ systemati-  
410 cally in occupancy probabilities (e.g. due to different habitat preferences) and in detection  
411 probabilities (e.g. due to different encounter rates with leeches, or leech feeding preferences).  
412 Alternative groupings could also be justified on biological grounds: for example, separating  
413 mammals and birds on the basis that many of the mammals are terrestrial while many  
414 of the birds are arboreal; or grouping birds and squamates together to better reflect phy-  
415 logeny. Such alternative groupings did not perform well in our datasets, as most birds and  
416 squamates were observed too infrequently to provide much information on these groups by  
417 themselves, but this aspect of the model would be worth revisiting in future work.

418 We estimated our models using a Bayesian framework with JAGS v4.3.0 [86]. We used  
419 5 chains of 80,000 generations, including a burn-in of 10,000, retaining all rounds (i.e.  
420 without thinning) for the posterior sample. Supplementary File S1 provides details of the  
421 prior distributions used for the model parameters. From the model results we calculated  
422 posterior means and quantiles for all model parameters of interest, as well as estimated  
423 species richness for each patrol area, and number of sites occupied for each species.

### 424 3.7 Statistical analyses

425 *Species richness.* To assess the comprehensiveness of our sampling, we used the R pack-  
426 age `iNEXT` [87] to interpolate and extrapolate sampling curves for species richness, treat-  
427 ing replicates from our study as sampling units, and to generate asymptotic richness esti-  
428 mates.

429 After examining occupancy and detection estimates for each species, we used histograms  
430 to visualize the distribution of estimated species richness per patrol area. We calculated  
431 median estimated species richness across the patrol areas for comparison with median ob-  
432 served species richness per patrol area and per replicate. We drew choropleths to visualize  
433 the spatial distribution of both observed and estimated species richness across the nature  
434 reserve.

435 We examined community mean occupancy and detection probabilities (see e.g. Section 11.7.2  
436 in [88]) to help understand the effects of the site and sample covariates. For each species  
437 group  $g = 1, 2$  (representing mammals/birds and amphibians/squamates, respectively), we  
438 calculated the posterior mean and 95% Bayesian confidence interval for community mean  
439 occupancy and detection as functions of the covariates:

$$\psi_g(\text{elevation}) = \text{logit}^{-1}(\mu_{\beta_0g} + \mu_{\beta_1}\text{elevation}) \quad (10)$$

$$\psi_g(\text{reserve}) = \text{logit}^{-1}(\mu_{\beta_0g} + \mu_{\beta_2}\text{reserve}) \quad (\text{for the LSU model only}) \quad (11)$$

$$p_g(\text{leeches}) = 1 - (1 - \text{logit}^{-1}(\mu_{\gamma_0g}))^{\text{leeches}/100} \quad (12)$$

440 This approach effectively holds distance from reserve edge at zero in  $\psi_g(\text{elevation})$ , and  
441 elevation at zero in  $\psi_g(\text{reserve})$ , corresponding to the mean values for these covariates in  
442 our data, since predictors were normalized prior to modelling. To visualize variation among  
443 species in occupancy and detection response to covariates, we repeated these calculations  
444 using each species' estimates for  $\beta_0, \beta_1, \beta_2$  and  $\gamma_0$  in place of the community hyperparameters  
445 to obtain the posterior means for each species.

446 We compared three measures of species richness between the two datasets in order to assess  
447 the extent to which the two datasets agreed on variation in richness within Ailaoshan. First,  
448 the observed species richness in each replicate; second, the observed species richness in each  
449 patrol area; and third, the estimated species richness in each patrol area (i.e. the posterior  
450 mean number of species, calculated from  $z_{ij}$ ). For each of these measures, we computed the  
451 Pearson correlation between the datasets and tested the correlation coefficient against zero  
452 with a  $t$ -test. We also used Poisson GLMs to examine the relationship between each of these  
453 species richness measures and sampling effort: we regressed observed species richness per  
454 replicate against the log-transformed number of leeches per replicate, and we regressed both  
455 the observed and estimated species richnesses per patrol area against the log-transformed  
456 number of replicates per patrol area, testing the significance of the slope coefficients with  
457  $t$ -tests.

458 *Community composition.* We explored variation in vertebrate community composition  
459 among patrol areas using posterior mean Jaccard similarities calculated from the estimated  
460 occupancy states  $z_{ij}$  (see Dorazio [78] and Kéry and Royle [88] for other examples of this  
461 approach). We visualized the pairwise Jaccard distances (i.e.  $\text{distance} = (1 - \text{similarity})$ )  
462 using non-metric multidimensional scaling ordinations, overlaying environmental covariates  
463 using the `vegan::ordisurf` function. We clustered patrol areas based on the Jaccard dis-  
464 tances using Ward's criterion (R function `hclust(., method = "ward.D2")`). We used  
465 this clustering to split the patrol areas into three groups, which turned out to correspond to  
466 low-, intermediate-, and high-elevation sites. We used Cramer's  $V$  to quantify the extent to  
467 which these clusters matched across the two datasets. We visualized the spatial variation in  
468 community composition within the reserve by drawing maps of Ailaoshan with patrol areas  
469 colored by these three clusters. To help understand how vertebrate communities varied  
470 among the clusters, we used the posterior sample of the occupancy states  $z_{ij}$  to calculate  
471 posterior means and 95% Bayesian confidence intervals for the occupancy (i.e. fraction of  
472 patrol areas occupied) of each species in the low-, intermediate- and high-elevation site  
473 clusters.

474 To assess the extent to which the two datasets identified common patterns of variation in  
475 community composition across the patrol areas, we performed a co-inertia analysis on the  
476 matrices of predicted species in each patrol area in each dataset using `ade4::coinertia`  
477 in R. We used the RV coefficient [89] to quantify coinertia, testing its significance with the  
478 permutation test in `ade4::RV.rtest` with 999 permutations. We also tested for correlation  
479 between the posterior mean Jaccard distances from the two datasets using a Mantel test  
480 with 999 permutations.

## 481 4 Results

### 482 4.1 Species

483 We identified 86 vertebrate species across the LSU and SSU datasets, in addition to humans.  
484 The LSU dataset included 59 species, and the SSU dataset contained 72 species. Although  
485 the LSU primers target mammals, both the LSU and SSU primers amplified amphibians,  
486 birds, mammals, and squamates, with the general-vertebrate SSU primers amplifying more  
487 bird species (Figure 2a). Forty-five species were common to both datasets, including those  
488 that were linked by their distribution across replicates (Figure S2), leaving 14 species unique  
489 to LSU and 27 species unique to SSU. We were able to assign taxonomic names down to species  
490 level for 58 of our 86 species (45 LSU, 50 SSU). Table 2 lists the top 20 species in each dataset  
491 by estimated occupancy.

492 Asymptotic estimates for the combined LSU and SSU dataset suggested that the total  
493 species richness detectable using our LSU and SSU primers was around 107 species (95%  
494 confidence interval 94 to 141 species; Figure 2b). Additional replicates might therefore  
495 be expected to capture around 25% more species, but it would likely require double the  
496 number of replicates in the present study to capture them fully. The sampling curves for  
497 the individual datasets illustrate the value of using multiple primers: the combined data set  
498 produced observed species richness comparable to the SSU data with around 450 replicates,  
499 and comparable to the LSU data with around 250 replicates.

500 Domesticated species featured heavily in our data (Supplementary File S2), consistent with  
501 observed grazing of these species in the reserve (pers. obs.). Domestic cattle (*Bos taurus*)  
502 were the most frequently detected taxon in both datasets, being detected in almost half of  
503 all patrol areas; domestic goats (*Capra hircus*) were also common, being detected in just  
504 under a third of patrol areas, and domestic sheep (*Ovis aries*) were detected in around 6%  
505 of patrol areas.

506 Several of the wild taxa detected in our survey are listed as threatened or near-threatened  
507 by the IUCN (Table 3). Among the mammals, four species have IUCN Vulnerable sta-  
508 tus: Asiatic black bear (*Ursus thibetanus*), mainland serow (*Capricornis milneedwardsii*),  
509 sambar (*Rusa unicorn*), and stump-tailed macaque (*Macaca arctoides*). Among the am-  
510 phibians, the Yunnan spiny frog (*Nanorana yunnanensis*) and the Chapa bug-eyed frog  
511 (*Theioderma bicolor*) are listed as Endangered, while the piebald spiny frog (*Nanorana*  
512 *maculosa*), Yunnan Asian frog (*Nanorana unculuanus*) and Jingdong toothed toad (*Oreo-*  
513 *lala x jingdongensis*) have Vulnerable status. Some of these taxa, especially the amphibians,  
514 were widespread present in Ailaoshan (Table 3 and Supplementary File S2), highlighting  
515 the value of this reserve for protecting these species.

516 In general, leech iDNA appeared to be more successful at detecting Ailaoshan's mammals  
517 and amphibians than its birds and squamates, based on our comparison with species lists  
518 from the Kunming Institute of Zoology (Supplementary File S6). Among mammals, 34 of the  
519 127 species in Ailaoshan were detected, with nearly half the detections in the larger-bodied  
520 orders: Artiodactyla (8 of 11 species), Carnivora (7 of 18), and non-human primates (1 of 4).  
521 Of the smaller-bodied orders, we detected 14 of 41 Rodentia species (including two porcupine  
522 species, *Atherurus macrourus* and *Hystrix brachyura*), 2 of 24 Eulipotyphla species (shrews  
523 and allies), and no bats (0 of 25), rabbits (0 of 1), pangolins (0 of 1), or treeshrews (0 of 1).

524 We also detected two unnamed species assigned to Rodentia. Among amphibians, 12 of the  
525 25 frog species (order Anura) known from Ailaoshan were detected, and so were both of the  
526 salamander species (family Salamandridae). We detected 13 more anuran species that could  
527 not be assigned to species, including two assigned to the genus *Kurixalus*, which has not been  
528 reported from Ailaoshan but which has a distribution that overlaps Yunnan (Supplementary  
529 File S6). Among squamates, we detected only 3 unnamed species, compared to 39 species  
530 known from Ailaoshan. One of our species was assigned only to Squamata, and the others  
531 to families Scincidae and Viperidae respectively. Finally, among birds, 12 of the 462 bird  
532 species known from Ailaoshan were detected, plus 10 more species that were assigned to  
533 genus or higher. Interestingly, of the 12 species identified to species level, five are in the  
534 ground-feeding and terrestrial Phasianidae (pheasants and allies), out of 14 species known  
535 from Ailaoshan, and the other seven are known to be part-time ground and understory  
536 feeders. Given that our LSU and SSU primers both had high amplification success  $B_c$  for  
537 mammals and birds (see Methods 3.4 *Laboratory Processing*), we tentatively attribute the  
538 difference in detection rates to the leeches – which were predominantly collected by rangers  
539 at ground level – having been more likely to have parasitised frogs than non-ground-feeding  
540 birds.

541 The most common taxa had occupancy estimates of around 0.6 in the LSU dataset and  
542 0.8 in the SSU dataset (Table 2). Most taxa, however, were observed infrequently (median  
543 number of detections: 2 and 3 patrol areas in the LSU and SSU datasets, respectively). This  
544 was reflected in low occupancy and detection estimates for many taxa (Figure 2c) (median  
545 fraction of sites occupied: 0.33 and 0.25 in LSU and SSU, respectively; median probability  
546 of detection per 100 leeches: 0.04 and 0.08 in LSU and SSU, respectively).

547 Supplementary File S2 lists all species, including observed occupancy as well as their occu-  
548 pancy and detection estimates. Supplementary Files S3 and S4 provide the representative  
549 sequences for each species in FASTA format. Supplementary File S5 provides tables of  
550 read counts along with sample metadata. Supplementary File S6 provides the working  
551 Ailaoshan species lists from Kunming Institute of Zoology researchers, with the matched  
552 and unmatched OTUs.

## 553 4.2 Species richness

554 Per patrol area, estimated median species richness was 23 in both the LSU and the SSU  
555 datasets, compared to observed median species richnesses of 3 and 4 species per patrol area  
556 (Figure S3a,b). Per replicate, observed median species richness was 1 and 2 in the LSU  
557 and SSU datasets, respectively, from a median of 3 and 4 replicates per patrol area in each  
558 dataset.

559 The substantial gap between observed and estimated species richness per patrol area in both  
560 datasets highlights the extent to which imperfect detection of vertebrate species may bias  
561 biodiversity estimates. Although estimated detection varied widely among species, most  
562 species had very low detection probabilities, especially in replicates containing few leeches  
563 (Figure S3c-f). These results underscore the importance of correcting for false negatives  
564 when using iDNA to conduct biodiversity surveys.

565 Almost half of all patrol areas had no observed species, either because they were not sampled,  
566 or because of inadequate labelling of samples (Figures 3a,b; though note that this map does

**Table 2: (a)** Top species by estimated occupancy in the LSU dataset. Occupancy represents the posterior mean for the fraction of patrol areas occupied by each species, with 95% Bayesian confidence intervals (BCIs) shown in parentheses. Taxonomic information and IUCN Red List category are based on classification generated by PROTAX. IUCN categories: LC = Least Concern; NT = Near Threatened; EN = Endangered. Supplementary File S2 provides a complete list of species.

**(a) LSU dataset**

| Rank | Scientific name                  | Common name                               | IUCN category | Occupancy (95% BCI)   |
|------|----------------------------------|-------------------------------------------|---------------|-----------------------|
| 1    | <i>Bufo pageoti</i>              | Tonkin toad (缅甸溪蟾)                        | NT            | 0.639 (0.541 - 0.761) |
| 2    | <i>Bombina maxima</i>            | Yunnan firebelly toad (大蹼铃蟾)              | -             | 0.636 (0.541 - 0.746) |
| 3    | <i>Rhacophorus</i> sp1           | -                                         | -             | 0.631 (0.488 - 0.809) |
| 4    | <i>Bos taurus</i>                | domestic cattle (黄牛)                      | -             | 0.625 (0.541 - 0.708) |
| 5    | <i>Capra hircus</i>              | domestic goats (山羊)                       | -             | 0.621 (0.488 - 0.756) |
| 6    | <i>Kurixalus</i> sp1             | -                                         | -             | 0.616 (0.273 - 0.943) |
| 7    | <i>Nanorana yunnanensis</i>      | Yunnan spiny frog (云南棘蛙)                  | EN            | 0.614 (0.383 - 0.890) |
| 8    | <i>Kurixalus</i> sp2             | -                                         | -             | 0.610 (0.263 - 0.933) |
| 9    | <i>Glyphoglossus yunnanensis</i> | Yunnan small narrow-mouthed frog (云南小狭口蛙) | LC            | 0.608 (0.292 - 0.923) |
| 10   | <i>Cynops cyanurus</i>           | cyan newt (蓝尾蝾螈)                          | LC            | 0.606 (0.230 - 0.933) |
| 11   | Megophryidae sp5                 | -                                         | -             | 0.605 (0.344 - 0.880) |
| 12   | Megophryidae sp4                 | -                                         | -             | 0.604 (0.244 - 0.904) |
| 13   | <i>Rana chaochiaoensis</i>       | Chaochiao Brown Frog (昭觉林蛙)               | LC            | 0.604 (0.268 - 0.923) |
| 14   | <i>Nanorana maculosa</i>         | piebald Spiny Frog (花棘蛙)                  | VU            | 0.604 (0.249 - 0.909) |
| 15   | <i>Theloderma bicolor</i>        | Chapa bug-eyed frog (双色棱皮树蛙)              | EN            | 0.603 (0.225 - 0.919) |
| 16   | <i>Tylototriton verrucosus</i>   | Himalayan salamander (棕黑疣螈)               | LC            | 0.600 (0.407 - 0.818) |
| 17   | Megophryidae sp1                 | -                                         | -             | 0.596 (0.239 - 0.904) |
| 18   | Megophryidae sp2                 | -                                         | -             | 0.595 (0.220 - 0.900) |
| 19   | <i>Leptobrachium ailaonicum</i>  | Ailao moustache toad (哀牢髭蟾)               | NT            | 0.594 (0.220 - 0.904) |
| 20   | Viperidae sp1                    | -                                         | -             | 0.594 (0.206 - 0.904) |

**Table 2: (continued) (b)** Top species by estimated occupancy in the SSU dataset. Occupancy represents the posterior mean for the fraction of patrol areas occupied by each species, with 95% Bayesian confidence intervals (BCIs) shown in parentheses. Taxonomic information and IUCN Red List category are based on classification generated by PROTAX. IUCN categories: LC = Least Concern; NT = Near Threatened; EN = Endangered. Supplementary File S2 provides a complete list of species.

**(b) SSU dataset**

| Rank | Scientific name                  | Common name                               | IUCN category | Occupancy (95% BCI)   |
|------|----------------------------------|-------------------------------------------|---------------|-----------------------|
| 1    | Megophryidae sp6                 | –                                         | –             | 0.818 (0.507 - 1.000) |
| 2    | <i>Tylotriton verrucosus</i>     | Himalayan salamander (棕黑疣螈)               | LC            | 0.769 (0.536 - 0.990) |
| 3    | <i>Leptobrachium ailaonicum</i>  | Ailao moustache toad (哀牢髭蟾)               | NT            | 0.728 (0.383 - 0.990) |
| 4    | <i>Bufo pageoti</i>              | Tonkin toad (缅甸溪蟾)                        | NT            | 0.702 (0.574 - 0.842) |
| 5    | <i>Cynops cyanurus</i>           | cyan newt (蓝尾蝾螈)                          | LC            | 0.699 (0.187 - 1.000) |
| 6    | Megophryidae sp5                 | –                                         | –             | 0.693 (0.550 - 0.842) |
| 7    | Megophryidae sp3                 | –                                         | –             | 0.672 (0.531 - 0.828) |
| 8    | <i>Rana chaochiaoensis</i>       | Chaochiao brown frog (昭觉林蛙)               | LC            | 0.663 (0.330 - 0.990) |
| 9    | <i>Bos taurus</i>                | domestic cattle (黄牛)                      | –             | 0.628 (0.545 - 0.713) |
| 10   | <i>Bombina maxima</i>            | Yunnan firebelly toad (大蹼铃蟾)              | –             | 0.621 (0.512 - 0.737) |
| 11   | <i>Oreolalax jingdongensis</i>   | Jingdong toothed toad (景东齿蟾)              | VU            | 0.602 (0.488 - 0.727) |
| 12   | <i>Glyphoglossus yunnanensis</i> | Yunnan small narrow-mouthed frog (云南小狭口蛙) | LC            | 0.595 (0.062 - 1.000) |
| 13   | <i>Nanorana unculuanus</i>       | Yunnan Asian frog (棘肛蛙)                   | VU            | 0.594 (0.498 - 0.694) |
| 14   | <i>Capra hircus</i>              | domestic goat (山羊)                        | –             | 0.576 (0.450 - 0.713) |
| 15   | Leiostichidae sp1                | –                                         | –             | 0.555 (0.349 - 0.823) |
| 16   | <i>Nanorana yunnanensis</i>      | Yunnan spiny frog (云南棘蛙)                  | EN            | 0.541 (0.249 - 0.967) |
| 17   | Anura sp1                        | –                                         | –             | 0.517 (0.077 - 1.000) |
| 18   | <i>Rhacophorus</i> sp1           | –                                         | –             | 0.474 (0.325 - 0.651) |
| 19   | <i>Dremomys rufigenis</i>        | red-cheeked squirrel (红颊长吻松鼠)             | LC            | 0.444 (0.301 - 0.627) |
| 20   | <i>Muntiacus vaginalis</i>       | northern red muntjac (赤麂)                 | LC            | 0.432 (0.239 - 0.751) |



**Table 3:** Detected species categorized as threatened or near-threatened by the International Union for Conservation of Nature (IUCN). LSU occupancy and SSU occupancy provide mean posterior estimates in the two datasets for the fraction of sites occupied at Ailaoshan (95% Bayesian confidence intervals in parentheses). Dashes indicate species that were not detected in one of the two datasets. Taxonomic information and IUCN Red List category are based on classification generated by PROTAX. IUCN categories: NT = Near Threatened; EN = Endangered; VU = Vulnerable. Supplementary File S2 provides a complete list of species.

| Group      | Scientific name                   | Common name                  | IUCN category | LSU occupancy         | SSU occupancy         |
|------------|-----------------------------------|------------------------------|---------------|-----------------------|-----------------------|
| Amphibians | <i>Bufo pageoti</i>               | Tonkin toad (缅甸溪蟾)           | NT            | 0.639 (0.541 - 0.761) | 0.702 (0.574 - 0.842) |
| Amphibians | <i>Leptobrachium ailaonicum</i>   | Ailao moustache toad (哀牢髭蟾)  | NT            | 0.594 (0.220 - 0.904) | 0.728 (0.383 - 0.990) |
| Amphibians | <i>Nanorana maculosa</i>          | piebald spiny frog (花棘蛙)     | VU            | 0.604 (0.249 - 0.909) | –                     |
| Amphibians | <i>Nanorana unculuanus</i>        | Yunnan Asian frog (棘肛蛙)      | VU            | 0.559 (0.455 - 0.660) | 0.594 (0.498 - 0.694) |
| Amphibians | <i>Nanorana yunnanensis</i>       | Yunnan spiny frog (云南棘蛙)     | EN            | 0.614 (0.383 - 0.890) | 0.541 (0.249 - 0.967) |
| Amphibians | <i>Oreolalax jingdongensis</i>    | Jingdong toothed toad (景东齿蟾) | VU            | –                     | 0.602 (0.488 - 0.727) |
| Amphibians | <i>Theloderma bicolor</i>         | Chapa bug-eyed frog (双色棱皮树蛙) | EN            | 0.603 (0.225 - 0.919) | –                     |
| Birds      | <i>Cyanoptila cumatilis</i>       | Zappey's flycatcher (白腹暗蓝)   | NT            | 0.209 (0.019 - 0.679) | 0.254 (0.048 - 0.694) |
| Birds      | <i>Syrnaticus humiae</i>          | Mrs Hume's pheasant (黑颈长尾雉)  | NT            | –                     | 0.203 (0.024 - 0.651) |
| Mammals    | <i>Capricornis milneedwardsii</i> | mainland serow (中华鬣羚)        | VU            | 0.217 (0.024 - 0.679) | 0.207 (0.024 - 0.632) |
| Mammals    | <i>Catopuma temminckii</i>        | Asiatic golden cat (金猫)      | NT            | –                     | 0.168 (0.014 - 0.569) |
| Mammals    | <i>Elaphodus cephalophus</i>      | tufted deer (毛冠鹿)            | NT            | 0.205 (0.029 - 0.584) | –                     |
| Mammals    | <i>Macaca arctoides</i>           | stump-tailed macaque (短尾猴)   | VU            | 0.249 (0.043 - 0.694) | –                     |
| Mammals    | <i>Rusa unicolor</i>              | sambar (水鹿)                  | VU            | 0.215 (0.014 - 0.689) | –                     |
| Mammals    | <i>Ursus thibetanus</i>           | Asiatic black bear (亚洲黑熊)    | VU            | 0.282 (0.038 - 0.766) | 0.202 (0.019 - 0.718) |

567 not display samples returned without location information, which were still used as data  
568 in our model). Our occupancy models impute missing data and therefore provided species-  
569 richness estimates for all patrol areas, both with and without observed values (Figures 3c,d).  
570 Both datasets indicated that species richness is highest in the southern third of the Ailaoshan  
571 Nature Reserve.

572 At the community level, species were more likely to occur at higher elevation and, to a  
573 lesser extent, at greater distance from reserve edge. This can be seen in two ways. Firstly,  
574 estimated species richness in the reserve increased with elevation (both datasets) and with  
575 distance to reserve edge (LSU dataset) (Figures 3e,f). Secondly, community mean occupancy  
576 (Equations 10 and 11) increased with elevation in both datasets, holding distance to reserve  
577 edge constant in the LSU dataset (Figures 4a,e). On the other hand, community mean  
578 occupancy did not increase with distance to reserve edge in the LSU dataset, with elevation  
579 held constant (Figure 4c).

580 There was good agreement on species richness between the LSU and SSU datasets. Observed  
581 species richness in the two datasets was positively correlated at the grain of individual  
582 replicates (Figure S4a) and of patrol areas (Figure S4c). Unsurprisingly, estimated species  
583 richness was also tightly and positively correlated between the two datasets (Figure S4e).  
584 Sampling effort increased species detections: replicates with more leeches tended to contain  
585 more species (Figure S4b), as did patrol areas with more replicates (Figure S4d). However,  
586 as expected, estimated species richness did not increase with sampling effort, because our  
587 model compensates for variation in leech quantity and replicate number (Figure S4f).

588 At the level of individual species, the effects of elevation (both datasets) and distance to  
589 reserve edge (LSU only) varied in both direction and strength (Figures 4b,d,f). Among  
590 mammals over 10 kg, domestic cow (*B. taurus*), domestic sheep (*O. aries*), domestic goat  
591 (*C. hircus*), and muntjak (*Muntiacus vaginalis*) showed decreasing occupancy probability  
592 with elevation (Figures S5 and S7). These species were therefore more likely to occur in  
593 lower elevation sites. These sites in turn tend to be closer to the reserve edge; however,  
594 as for community mean occupancy, the independent effect of distance to reserve edge was  
595 small (Figure S6). In contrast, species such as tufted deer (*Elaphodus cephalophus*), sambar  
596 (*R. unicolor*), serow (*C. milneedwardsii*), Asiatic black bear (*U. thibetanus*), and wild boar  
597 (*Sus scrofa*) showed increasing occupancy probability with elevation and were thus more  
598 likely to occur in higher-elevation forest toward the centre of the reserve (Figures S5 and  
599 S7).

600 Among mammals below 10 kg, most species were also estimated to have greater occupancy  
601 in more central, higher-elevation forest, including the Asian red-cheeked squirrel (*Dremomys*  
602 *rufigenis*) and the shrew gymnure (*Neotetracus sinensis*) (Figures S5 and S7). Birds also  
603 generally had higher occupancy in higher elevation sites. On the other hand, a few small-  
604 mammal species such as the Himalayan field rat (*Rattus nitidus*) fared better in reserve-edge,  
605 lower-elevation forest. Amphibians showed a mix of responses, with some species such as  
606 the Tonkin toad (*Bufo pageoti*; IUCN Near Threatened) and the Jingdong toothed toad (*O.*  
607 *jingdongensis*; IUCN Vulnerable) more common in less accessible areas at higher elevations,  
608 but others such as the fire-bellied toad (*Bombina maxima*) more common in reserve-edge,  
609 lower-elevation forest.

### 610 4.3 Community composition

611 In both datasets, hierarchical clustering separated patrol areas into three clear groups, which  
612 corresponded to low-, intermediate- and high-elevation sites (Figures 5a,b and S8). These  
613 groups of sites were highly congruent across the two datasets (Cramer's  $V = 0.83$ , 95%  
614 confidence interval 0.75 - 0.89). The higher-elevation areas tend to be located in the interior  
615 of the reserve, especially in the south, and contain larger amounts of relatively inaccessible  
616 forest compared to lower-elevation areas (Figures S1a,i; mean  $\pm$  s.d. distance to reserve  
617 edge 1540 m  $\pm$  850 m for top quartile of sites by elevation, compared to 830 m  $\pm$  390 m for  
618 the bottom quartile).

619 Communities in the low-elevation patrol areas were strongly characterized by the presence of  
620 domestic cow (*B. taurus*), domestic goat (*C. hircus*), muntjak (*M. vaginalis*) and fire-bellied  
621 toad (*B. maxima*) (Figure 6). These species were present in the majority of low-elevation  
622 sites, but less than half of the high-elevation sites. In contrast, the Tonkin toad (*B. pageoti*)  
623 and the Jingdong toothed toad (*O. jingdongensis*) showed the reverse pattern: i.e. they were  
624 absent from most of the low-elevation sites, but present in most of the high-elevation patrol  
625 areas. Indeed, many amphibians and birds occupied a larger fraction of high-elevation sites  
626 than of low-elevation sites (Figures S9 and S10). Some species, however, such as the Yunnan  
627 Asian frog (*N. unculuanus*), showed similar site occupancy across low-, intermediate- and  
628 high-elevation sites (Figure 6).

629 Comparing the variation in composition among sites across the two datasets revealed signif-  
630 icant co-inertia (RV coefficient [89] 0.77,  $p \leq 0.001$ ), indicating that there was substantial  
631 shared signal in the two datasets. The Jaccard distances from the two datasets were also  
632 highly correlated (Pearson correlation  $r = 0.93$ ,  $p = 0.001$ ).

## 633 5 Discussion

634 Here we have demonstrated that metabarcoding of iDNA from bulk-collected leeches is an  
635 effective way to survey vertebrate biodiversity, requiring untrained forest rangers only 2-3  
636 months to capture distribution information on mammals and amphibians, and to a much  
637 lesser extent, birds and squamates, across a topographically challenging, 677 km<sup>2</sup> nature  
638 reserve, with a mean sampling unit of 3.9 km<sup>2</sup> (Figure 1). Our study is both the most gran-  
639 ular and the broadest-scale biodiversity survey using iDNA to date, and the results show  
640 that the reserve does provide protected space for vertebrate species of high conservation  
641 value, mostly in its core area. However, the results also highlight the vulnerability of the  
642 rest of the reserve to degradation arising from human activity (i.e. farming, livestock, and  
643 possibly poaching) (Figures 3 and 5). This study thus provides a vertebrate biodiversity  
644 baseline for the Ailaoshan Nature Reserve, and future surveys can test for change in occu-  
645 pancy as a proxy for effectiveness, as argued by Beaudrot *et al.* [12]. In contrast, the most  
646 recent camera-trap study in Ailaoshan [40], run by researchers, surveyed only two patrol  
647 areas, detected 10 mammal species and 10 bird species and thus could not measure reserve  
648 effectiveness. Our study also functions as a progress report on the use of iDNA in a real-  
649 world management setting and highlights areas for improvement in iDNA monitoring going  
650 forward.

## 651 5.1 Vertebrate biodiversity in Ailaoshan

652 Our iDNA survey recovered 86 species of mammals, amphibians, birds, and squamates, plus  
653 humans. Many replicates contained evidence of common wildlife species, or domesticated  
654 taxa, including cattle. The dataset also included many less common taxa that would have  
655 not been detected without targeted traditional surveys, including 15 species recognized by  
656 the IUCN as near-threatened or threatened (Table 3).

657 Occupancy modelling indicated that vertebrate species richness was greatest in the higher-  
658 elevation portions of Ailaoshan. Our result likely reflects higher levels of anthropogenic  
659 disturbance in the lower, more-accessible parts of the park, leading to local extinctions  
660 of many wildlife species at lower elevations (due to some combination of hunting, disease  
661 transmitted from domestic animals to wildlife, and habitat alteration). Alternatively, some  
662 species may simply have moved away from their preferred lower-elevation areas into less  
663 suitable habitat to escape human encroachment [24].

664 Elevation and distance to reserve edge were important predictors of vertebrate community  
665 richness and composition (Figures 3e,f and 5a,b). Examining the distribution of individual  
666 taxa revealed that many species, especially birds and small mammals, had higher occupancy  
667 at higher elevation and in the reserve interior. These species include several that are IUCN  
668 near-threatened or threatened species: stump-tailed macaque (*Macaca arctoides*), tufted  
669 deer (*E. cephalophus*), sambar (*R. unicolor*), serow (*C. milneedwardsii*), and Asiatic black  
670 bear (*U. thibetanus*). Some or all of these species are likely sensitive to habitat alteration  
671 along the reserve edge, to poaching, to competition with domestic animals (e.g. most ungu-  
672 lates), and/or may be prone to human-wildlife conflict (e.g. Asiatic black bear) in degraded  
673 areas where livestock use mixes with conservation areas. In contrast, a few wild species, like  
674 the northern red muntjak (*M. vaginalis*), appear to do better in reserve-edge areas.

## 675 5.2 Using iDNA for biodiversity monitoring

676 Two key benefits of leech-iDNA surveys are (A) the ability to survey across a wider range  
677 of vertebrate taxa and body sizes than is possible for any other method (here, mammals,  
678 amphibians, and phasianid birds) and (B) the feasibility of contracting large numbers of  
679 minimally trained collectors. Both benefits result in time and cost savings, and the lat-  
680 ter benefit, in our estimation, finally makes it operationally feasible to survey the entire  
681 Ailaoshan reserve on a regular basis. However, these benefits are partly offset by a greater  
682 laboratory workload (which could be mitigated in part by automation); challenges over the  
683 design of sampling incentives (see below); iDNA-specific sampling errors and biases; and  
684 a larger workload associated with bioinformatic processing and statistical modelling. We  
685 required 12 person-months (six months  $\times$  two people) to count the leeches, extract DNA,  
686 and run PCRs, and Novogene required one month to construct libraries and carry out se-  
687 quencing. The consumables cost of DNA extraction, PCR, and sequencing was around  
688 RMB 210,000 (USD 30,000), with an additional RMB 80,000 (USD 12,000) for primers, the  
689 latter of which covers a stock that can be shared with other projects or labs.

690 *Design of sampling incentives.* Sampling with the assistance of forest rangers proved to  
691 be a feasible and cost-effective way to collect leeches from across the entire reserve with  
692 good levels of replication. This is despite the fact that the rangers were hired locally from

693 neighbouring villages surrounding the park and did not report to a central location. In-  
694 stead, forestry officials brought boxes of hip packs to groups of rangers around the park  
695 in June-July 2016, issued instructions verbally, and retrieved the packs after September.  
696 Provisioning the packs with tubes distributed over multiple self-sealing bags naturally en-  
697 forced replicate sampling with minimal explanation [28]. This approach made it feasible  
698 for replicates from each patrol area to be collected at a single time point, removing the  
699 possibility that occupancy might change between temporal replicates [35] (although, for  
700 logistical reasons, collections from different patrol areas took place over a period of three  
701 months).

702 Collection of metadata, however, was less successful, as many samples had information on  
703 the collecting ranger but not the patrol area. In future sampling, metadata submission  
704 could be made a condition of payment, and a subset of senior rangers should be trained on  
705 metadata collection. A longer-range possibility is to outfit rangers with a GPS app on their  
706 cell phones. That said, our occupancy modelling framework deals well with missing data,  
707 and we are wary of creating incentives to fabricate information. For instance, we decided  
708 against paying on a per-leech or per-tube basis, because this might incentivize rangers to  
709 collect outside the reserve. We found that a fixed payment, plus paying a small bonus for at  
710 least one leech collected, worked well, and we have since used this structure in other rounds  
711 of leech sampling. We do expect to need to increase future payments.

712 *Error and bias in iDNA sampling.* There are several potential sources of error in our  
713 study. One is the lag time between a leech's last feed and our sampling, which could be  
714 up to a few months [44]). While the retention of blood meal DNA facilitates detection of  
715 animals, it also means that detected DNA does not necessarily reflect current occupancy.  
716 Animal hosts may leave the patrol area between the feeding event and our sampling, and  
717 even leeches may disperse widely if carried on hosts such as birds that can travel long  
718 distances [90], potentially blurring the spatial resolution of our results. Our data show that  
719 the leeches we collected mostly feed on hosts that probably remain within one patrol area  
720 or, at most, move between adjacent areas (e.g. frogs), so our broad conclusions about the  
721 overall distributions of wild and domesticated species in Ailaoshan (Figures 3 and 5) are  
722 unlikely to be seriously affected. Further, the collection of all replicate samples from a  
723 location within the three-month window limits the potential for leech or host movements  
724 to violate the site-occupancy model assumption that species occupancy remains constant  
725 across replicates (i.e., the 'population closure' assumption [28, 91]). Nonetheless, the lag  
726 time restricts the suitability of leech iDNA for detecting very rapid change, occurring on  
727 the order of a few months, though longer term trends should still be detectable [28].

728 A second source of error is the possibility of systematic differences across patrol areas in  
729 leech communities, coupled with differing diet preferences among leech species, which could  
730 produce spurious spatial patterns of occupancy. For instance, if leech species differ with  
731 elevation (which we did not include as a detection covariate), and high-elevation leech species  
732 tend to feed more on frogs and less on cattle, this would give the appearance of change in  
733 these species' occupancy with elevation. The large number of leeches in our sample made  
734 it infeasible to identify them individually, although the geographic location of our field site  
735 and the uniform morphology of the leeches is consistent with all the leeches being in the  
736 genus *Haemadipsa* [33], the taxonomy of which is poorly resolved. *Haemadipsa* are known  
737 to feed widely [32, 33], probably because they are opportunistic, sit-and-wait parasites, and  
738 published evidence for dietary differences across species is at most only suggestive. Tessler

739 *et al.*'s [33] diet study of 750 leeches across 15 DNA-barcode clades of *Haemadipsa* reported  
740 that “no pattern was evident between leeches of a given clade and their prey,” given that  
741 multiple clades were each found to have fed on birds and on multiple mammalian orders.  
742 Even for the two most different *Haemadipsa* species, brown and tiger leeches, only mild  
743 differences in detection probabilities have been reported [29, 35]. Given this evidence, we  
744 conclude tentatively that differences in leech diets are unlikely to account for any of the  
745 major results in this study. Given this evidence, we decided upon a more tractable iDNA  
746 sampling scheme that did not take individual leech identity and diet into account, and that  
747 relied upon pooling leech samples for extraction.

748 A third potential source of error is the choice of PCR primers and genetic markers, which  
749 may prevent some taxa from being detected even when their DNA is present, e.g. due to  
750 non-amplification at the PCR stage. We addressed this problem in part by using data from  
751 two marker genes. More than half of the species were detected by both markers, and high  
752 correlation in species richness and co-inertia of community composition between the datasets  
753 suggested that broad ecological inferences would not have been strongly affected had either  
754 marker been chosen by itself (Figures 3 and 5). On the other hand, the primers clearly  
755 differed in their ability to amplify DNA from certain species. For example, we detected  
756 the stump-tailed macaque (*M. arctoides*) in the LSU dataset in three different patrol areas,  
757 with 2,700, 170,066, and 245,477 reads. But there was no obvious SSU equivalent, with no  
758 OTUs (other than humans) assigned to the order Primates in the SSU dataset. Of course,  
759 we do not know what additional taxa would have been detected by yet other primers, and  
760 ultimately we must be careful to restrict inferences from our model to taxa that we know  
761 can be detected. In the future, the use of nucleic-acid baits and/or metagenomic sequencing  
762 [92], or the new CARMEN method that multiplexes CRISPR-Cas13 detection [93], may  
763 replace PCR. Either approach could allow, for example, the use of the cytochrome *c* oxidase  
764 I (COI) barcode sequence, for which databases are better populated [94], while also allowing  
765 other genetic markers to be used for taxonomic groups that are not well distinguished by  
766 COI.

767 Finally, the use of leech iDNA will naturally exclude taxa that are not well represented  
768 in leech blood meals. Studies have reported lower iDNA detection rates for many species  
769 compared to camera trapping, though iDNA appears to be better at detecting smaller-bodied  
770 species of mammal [24, 36, 37, 44, 95], and, in our study, amphibians. With sufficiently large  
771 samples, taxa that are present infrequently may still be detected, and their low detection  
772 rates accounted for using site-occupancy modelling. Taxa that are never detected can still  
773 be modelled statistically (e.g. using data augmentation [42, 78]), but they obviously cannot  
774 contribute data towards the model. When leech sampling is the rate-limiting step, such as  
775 in researcher-led studies, Abrams *et al.* [35] recommend using leech-iDNA to supplement  
776 camera-trap data and increase confidence in occupancy estimates. For instance, Tilker  
777 *et al.* [24] recently ran a camera-trap survey at 139 stations (17,393 trap-nights) over five  
778 protected areas in Vietnam and Laos, spanning 900 km<sup>2</sup>, and supplemented the camera data  
779 with iDNA from 2,043 leeches from 93 of the stations. The camera-trap data were limited to  
780 23 terrestrial mammal species, with squirrels and large rodents being the smallest organisms  
781 detected, and generally produced more species detections. However, leech iDNA provided  
782 the sole detections of marbled cat (*Pardofelis marmorata*) and doubled the detections of  
783 Owston's civet (*Chrotogale owstoni*) and Asian black bear (*U. thibetanus*). Similar to our  
784 results, Tilker *et al.* [24] reported that wild mammal species occupancy increased with  
785 remoteness and elevation. However, as Gogarten *et al.* [95] have found, camera-trap and

786 fly-iDNA data classify habitats similarly, even when the two monitoring methods detect  
787 largely different communities (only 6% to 43% of species were found by both methods in  
788 any given location). This suggests that different components of the mammal community  
789 contain similar ecological information, a result that has also been found when comparing  
790 metabarcoded insects to visual bird and mammal surveys [45]. In our case, the large sample  
791 size made possible by rangers, combined with a wider taxonomic range than is achievable  
792 with camera traps alone, allowed us to parameterise an occupancy model using only leech-  
793 iDNA.

794 *Site-occupancy modelling.* Site occupancy modelling approach worked well to identify cor-  
795 relates of detection and occupancy at the level of the community as well as individual species.  
796 Most taxa were detected infrequently, and individually, they provided little insight into de-  
797 tection and occupancy rates, as it is difficult to distinguish low detection rates (i.e. crypsis)  
798 from low occupancy (i.e. rarity). However, by integrating these infrequent detections into  
799 community models of occupancy and detection, and sharing information across species and  
800 patrol areas, the entire dataset was able to produce a broad picture of vertebrate diversity  
801 across Ailaoshan. This modelling approach dealt well with missing data, demonstrating  
802 the usefulness of occupancy models in a Bayesian framework for dealing with the imperfect  
803 datasets that are to be expected with surveys across broad areas and relying on limited  
804 resources.

805 While in this study we focused our modelling attention on correcting for false negatives,  
806 false positives are also possible, e.g. due to lab contamination or taxonomic misassignment.  
807 While false negatives are likely to be a more serious problem than false positives in our  
808 dataset, false positives may nonetheless cause serious bias in the estimation of biodiversity  
809 [96]. Hierarchical models may, in principle, also be used to correct for false positives, but  
810 in practice they have proven challenging to estimate without additional information about  
811 the false-positive detection process [97]. Recent advances in modelling false positives show  
812 promise (e.g. [98]), but these approaches are not yet available for multi-species metabarcod-  
813 ing datasets.

814 As iDNA surveys are increasingly used on large scales, an important study design considera-  
815 tion will be the degree to which leeches are pooled. Pooling reduces the cost and complexity  
816 of the collecting task, since putting leeches into individual tubes requires a larger collecting  
817 kit (leeches regurgitate into the preservative fluid, such that leeches collected into the same  
818 tube cannot be treated as independent replicates, so separate tubes are needed). Pooling  
819 also reduces lab costs and workload. On the other hand, occupancy models such as the  
820 one employed here work best when provided with data from unpooled samples. Potentially  
821 valuable information about leech host preferences is also lost when samples are pooled: for  
822 example, if collected individually, the leeches could be DNA-barcoded, and this informa-  
823 tion used as a detection covariate in our occupancy model. Development of automated,  
824 high-throughput laboratory protocols (e.g. [93]) that would accommodate larger samples  
825 sizes such as those needed to test individual leeches at this scale (e.g. >30,000 individuals)  
826 would be desirable, and at the collection level, a compromise could be to use smaller, 2 mL  
827 collecting tubes, which would naturally keep leech number per tube small, but still retain  
828 the option of pooling later if needed.

### 829 **5.3 iDNA: a promising biodiversity monitoring tool**

830 Many protected areas are under-resourced and under-staffed [2], and costly monitoring ac-  
831 tivities are rarely prioritized, making it difficult to assess the effectiveness of reserves in  
832 protecting biodiversity [4]. We show here that iDNA metabarcoding can help relieve some  
833 of these constraints, by making possible *direct, repeatable, granular, auditable, understand-*  
834 *able*, and *efficient* maps of vertebrate occupancies, achieving both broad-scale coverage and  
835 fine-scale spatio-temporal-taxonomic resolution. To assess the effectiveness of Ailaoshan  
836 nature reserve at reaching its policy and management targets, and to identify changes in  
837 species richness and patterns of occurrence of species, future evaluations can now rely on  
838 the baseline established by this study.

839 Our work can also guide future monitoring to identify underlying sources of environmental  
840 change, anthropogenic influences, and overall wildlife community dynamics. We recommend  
841 using our results to guide the design of targeted scat-collection, camera-trap, and bioacoustic  
842 monitoring campaigns inside Ailaoshan, both to independently test our results with species  
843 that are amenable to being recorded with these methods (e.g. mammals, ground-dwelling  
844 birds), and to improve the accuracy of occupancy and detection estimates [35]. These  
845 monitoring methods could also be used to estimate population sizes and population trends  
846 for some species using an occupancy modelling framework [99–101]. We further propose  
847 that iDNA may be used to survey other dimensions of biodiversity, such as zoonotic disease.  
848 Recent work has demonstrated the exciting possibility of using leech-derived bloodmeals,  
849 sampled from the wild, to screen for both viruses and their vertebrate hosts [34, 102]. The  
850 2020 SARS-CoV-2 pandemic has underscored the urgency of better understanding zoonotic  
851 disease in wildlife reservoirs – a need that is likely to become even more pressing as global  
852 land use changes continue [103].

853 As we prepare to replace the Aichi Biodiversity Targets with a new post-2020 framework,  
854 there has been a call to focus on directly evaluating conservation outcomes using biodiversity  
855 measures such as occupancy, abundance, and population trends – in addition to targets  
856 on area and the representativeness of protected areas [4, 104]. Implementing biodiversity  
857 measures capable of detecting and diagnosing trends will require technological innovation  
858 so that biodiversity can be monitored repeatedly and granularly over large areas [17]. Our  
859 study shows how the extraction of biodiversity information from environmental DNA sources  
860 can be feasibly scaled up, and interpreted in a useful way, complementing biodiversity  
861 information revealed by technological innovation more broadly [105], and helping ensure  
862 that protected areas contribute effectively to achieving global biodiversity goals.

## 863 **6 Data availability**

864 The Illumina HiSeq/MiSeq read data are available from the NCBI Sequence Read Archive  
865 under BioProject accession number PRJNA624712.



## 866 7 Code availability

867 Our pipeline for processing the Illumina read data is available at  
868 [https://github.com/jiyingui/ailaoshan\\_leeches\\_method\\_code](https://github.com/jiyingui/ailaoshan_leeches_method_code) [46]. Bioinformatic scripts  
869 for processing the output of this pipeline, including taxonomic reference datasets, are  
870 available at <https://github.com/dougwyu/screenforbio-mlc-ailaoshan/releases/tag/1.3>  
871 [47]. The code for our analysis, including site occupancy modelling, is available at  
872 <https://github.com/bakerccm/ailaoshan/releases/tag/v1.0> (doi:10.5281/zenodo.4149010)  
873 [48].

## 874 8 Funding and Acknowledgments

875 We thank Jiang Xuelong, Yang Xiaojun, Che Jing, Li Xueyou, Chen Hongman, and Wu Fei  
876 for Ailaoshan species lists, and Michael Tessler and Mark Siddall for information on leech  
877 species distributions. CCMB, YHL, ZYW, DWY, and NEP were supported by the Harvard  
878 Global Institute. CLH and QZW were supported by Research and Application Demonstration  
879 on Key Technology of Primary Forest Resources Investigation and Monitoring in Yun-  
880 nan Province (2013CA004). YQ, JXW, LW, CYW, CYY, CCYX, and DWY were supported  
881 by the National Natural Science Foundation of China (41661144002, 31670536, 31400470,  
882 31500305, 31872963); the Key Research Program of Frontier Sciences, Chinese Academy of  
883 Sciences (QYZDY-SSW-SMC024); the Bureau of International Cooperation (GJHZ1754);  
884 the Strategic Priority Research Program, Chinese Academy of Sciences (XDA20050202,  
885 XDB31000000); the Ministry of Science and Technology of China (2012FY110800); and the  
886 Biodiversity Investigation, Observation and Assessment Program (2019-2023), Ministry of  
887 Ecology and Environment of China (8-2-3-4-11). DWY was also supported by a Leverhulme  
888 Trust Research Fellowship. VDP was supported by the Ohio University Department of Bio-  
889 logical Sciences and the Sustainability Studies Theme, and a grant from the Romanian Na-  
890 tional Authority for Scientific Research, CNCS-UEFISCDI (<http://uefiscdi.gov.ro>) project  
891 PN-III-P1-1.1-TE-2019-0835. The computations in this paper were run on the FASRC  
892 Cannon cluster supported by the FAS Division of Science Research Computing Group at  
893 Harvard University.

## 894 References

- 895 1. Convention on Biological Diversity. *Aichi Biodiversity Targets* <https://www.cbd.int/sp/targets> (2020).  
896
- 897 2. Coad, L. *et al.* Widespread shortfalls in protected area resourcing undermine efforts to  
898 conserve biodiversity. *Frontiers in Ecology and the Environment* **17**, 259–264 (2019).
- 899 3. Watson, J. E. M. *et al.* Bolder science needed now for protected areas. *Conservation*  
900 *Biology* **30**, 243–248 (2016).
- 901 4. Maxwell, S. L. *et al.* Area-based conservation in the twenty-first century. *Nature* **586**,  
902 217–227 (2020).

- 903 5. Xu, W. H. *et al.* Strengthening protected areas for biodiversity and ecosystem services  
904 in China. *PNAS* **114**, 1601–1606 (2017).
- 905 6. Bryan, B. A. *et al.* China’s response to a national land-system sustainability emer-  
906 gency. *Nature* **559**, 193–204 (2018).
- 907 7. Wu, R. *et al.* Strengthening China’s national biodiversity strategy to attain an eco-  
908 logical civilization. *Conservation Letters* **68**, e12660 (2019).
- 909 8. Ren, G. *et al.* Effectiveness of China’s National Forest Protection Program and nature  
910 reserves. *Conservation Biology* **29**, 1368–1377 (2015).
- 911 9. Wu, R. *et al.* Effectiveness of China’s nature reserves in representing ecological diver-  
912 sity. *Frontiers in Ecology and Evolution* **9**, 383–389 (2011).
- 913 10. Laurance, W. F. *et al.* Averting biodiversity collapse in tropical forest protected areas.  
914 *Nature* **489**, 290–294 (2012).
- 915 11. Geldmann, J. *et al.* Effectiveness of terrestrial protected areas in reducing habitat loss  
916 and population declines. *Biological Conservation* **161**, 230–238 (2013).
- 917 12. Beaudrot, L. *et al.* Standardized assessment of biodiversity trends in tropical forest  
918 protected areas: the end is not in sight. *PLoS Biology* **14**, e1002357 (2016).
- 919 13. Geldmann, J., Manica, A., Burgess, N. D., Coad, L. & Balmford, A. A global-level  
920 assessment of the effectiveness of protected areas at resisting anthropogenic pressures.  
921 *PNAS* **116**, 23209–23215 (2019).
- 922 14. Yiming, L. & Wilcove, D. S. Threats to vertebrate species in China and the United  
923 States. *BioScience* **55**, 147–153 (2005).
- 924 15. Ferraro, P. J., Uchida, T. & Conrad, J. M. Price premiums for eco-friendly commodi-  
925 ties: are ‘green’ markets the best way to protect endangered ecosystems? *Environ-*  
926 *mental and Resource Economics* **32**, 419–438 (2005).
- 927 16. Zabel, A. & Roe, B. Optimal design of pro-conservation incentives. *Ecological Eco-*  
928 *nomics* **69**, 126–134 (2009).
- 929 17. Dietz, T., Ostrom, E. & Stern, P. C. The struggle to govern the commons. *Science*  
930 **302**, 1907–1912 (2003).
- 931 18. Aide, T. M. *et al.* Real-time bioacoustics monitoring and automated species identifi-  
932 cation. *PeerJ* **1**, e103 (2013).
- 933 19. Lellouch, L., Pavoine, S., Jiguet, F., Glotin, H. & Sueur, J. Monitoring temporal  
934 change of bird communities with dissimilarity acoustic indices. *Methods in Ecology*  
935 *and Evolution* **5**, 495–505 (2014).
- 936 20. O’Brien, T. G., Baillie, J. E. M., Krueger, L. & Cuke, M. The Wildlife Picture Index:  
937 monitoring top trophic levels. *Animal Conservation* **13**, 335–343 (2010).
- 938 21. Wrege, P. H., Rowland, E. D., Keen, S. & Shiu, Y. Acoustic monitoring for conser-  
939 vation in tropical forests: examples from forest elephants. *Methods in Ecology and*  
940 *Evolution* **8**, 1292–1301 (2017).
- 941 22. Glover-Kapfer, P., Soto-Navarro, C. A. & Wearn, O. R. Camera-trapping version 3.0:  
942 current constraints and future priorities for development. *Remote Sensing in Ecology*  
943 *and Conservation* **5**, 209–223 (2018).

- 944 23. Meek, P. D. *et al.* Camera trap theft and vandalism: occurrence, cost, prevention and  
945 implications for wildlife research and management. *Remote Sensing in Ecology and*  
946 *Conservation* **5**, 160–168 (2019).
- 947 24. Tilker, A. *et al.* Identifying conservation priorities in a defaunated tropical biodiversity  
948 hotspot. *Diversity and Distributions* **10**, 100331–100315 (2020).
- 949 25. Bohmann, K. *et al.* Environmental DNA for wildlife biology and biodiversity moni-  
950 toring. *Trends in Ecology and Evolution* **29**, 358–367 (2014).
- 951 26. Bohmann, K., Schnell, I. B. & Gilbert, M. T. P. When bugs reveal biodiversity.  
952 *Molecular Ecology* **22**, 909–911 (2013).
- 953 27. Calvignac-Spencer, S., Leendertz, F. H., Gilbert, M. T. P. & Schubert, G. An inver-  
954 tebrate stomach’s view on vertebrate ecology. *BioEssays* **35**, 1004–1013 (2013).
- 955 28. Schnell, I. B. *et al.* iDNA from terrestrial haematophagous leeches as a wildlife survey-  
956 ing and monitoring tool – prospects, pitfalls and avenues to be developed. *Frontiers*  
957 *in Zoology* **12**, 302 (2015).
- 958 29. Drinkwater, R. *et al.* Using metabarcoding to compare the suitability of two blood-  
959 feeding leech species for sampling mammalian diversity in North Borneo. *Molecular*  
960 *Ecology Resources* **19**, 105–117 (2019).
- 961 30. Gogarten, J. F. *et al.* Tropical rainforest flies carrying pathogens form stable associ-  
962 ations with social nonhuman primates. *Molecular Ecology* **28**, 4242–4258 (2019).
- 963 31. Kocher, A. *et al.* iDNA screening: disease vectors as vertebrate samplers. *Molecular*  
964 *Ecology* **26**, 6478–6486 (2017).
- 965 32. Schnell, I. B. *et al.* Debugging diversity - a pan-continental exploration of the potential  
966 of terrestrial blood-feeding leeches as a vertebrate monitoring tool. *Molecular Ecology*  
967 *Resources* **18**, 1282–1298 (2018).
- 968 33. Tessler, M., Weiskopf, S. R., and, L. B. S. & 2018. Bloodlines: mammals, leeches, and  
969 conservation in southern Asia. *Systematics and Biodiversity* **16**, 488–496 (2018).
- 970 34. Alfano, N. *et al.* Non-invasive surveys of mammalian viruses using environmental  
971 DNA. *bioRxiv*, 2020.03.26.009993 (2020).
- 972 35. Abrams, J. F. *et al.* Shifting up a gear with iDNA: from mammal detection events to  
973 standardized surveys. *Journal of Applied Ecology* **18**, 511–512 (2019).
- 974 36. Rodgers, T. W. *et al.* Carrion fly-derived DNA metabarcoding is an effective tool for  
975 mammal surveys: Evidence from a known tropical mammal community. *Molecular*  
976 *Ecology Resources* **17**, e133–e145 (2017).
- 977 37. Weiskopf, S. R. *et al.* Using terrestrial haematophagous leeches to enhance tropical  
978 biodiversity monitoring programmes in Bangladesh. *Journal of Applied Ecology* **55**,  
979 2071–2081 (2018).
- 980 38. Axtner, J. *et al.* An efficient and robust laboratory workflow and tetrapod database  
981 for larger scale environmental DNA studies. *GigaScience* **8**, giz029 (2019).
- 982 39. Gillett, C. P. D. T., Johnson, A. J., Barr, I. & Hulcr, J. Metagenomic sequencing  
983 of dung beetle intestinal contents directly detects and identifies mammalian fauna.  
984 *bioRxiv*, 074849 (2016).

- 985 40. He, X., Luo, K., Lu, Z. Y. & Lin, L. X. Preliminary camera-trapping survey on wild  
986 mammals and birds in Ailaoshan National Nature Reserve, Yunnan Province, China.  
987 *Acta Theriologica Sinica* **38**, 318–322 (2018).
- 988 41. MacKenzie, D. I. *et al.* Estimating site occupancy rates when detection probabilities  
989 are less than one. *Ecology* **83**, 2248–2255 (2002).
- 990 42. Dorazio, R. M., Royle, J. A., Soderstrom, B. & Glimskar, A. Estimating species  
991 richness and accumulation by modeling species occurrence and detectability. *Ecology*  
992 **87**, 842–854 (2006).
- 993 43. Tyre, A. J. *et al.* Improving precision and reducing bias in biological surveys: esti-  
994 mating false-negative error rates. *Ecological Applications* **13**, 1790–1801 (2003).
- 995 44. Schnell, I. B. *et al.* Screening mammal biodiversity using DNA from leeches. *Current*  
996 *Biology* **22**, R262–R263 (2012).
- 997 45. Ji, Y. Q. *et al.* Reliable, verifiable and efficient monitoring of biodiversity via metabar-  
998 coding. *Ecology Letters* **16**, 1245–1257 (2013).
- 999 46. Ji, Y. *ECEC-ailaishan-leeches-bioinfo-pipeline* [https://github.com/jiyingqiu/](https://github.com/jiyingqiu/ailaoshan-leeches_method_code)  
1000 [ailaoshan\\_leeches\\_method\\_code](https://github.com/jiyingqiu/ailaoshan-leeches_method_code).
- 1001 47. Yu, D. *Ailaoshan version with unweighted and weighted PROTAX and MIDORI 1.2*  
1002 [https://github.com/dougwyu/screenforbio-mbc-ailaoshan/releases/tag/1.](https://github.com/dougwyu/screenforbio-mbc-ailaoshan/releases/tag/1.3)  
1003 [3](https://github.com/dougwyu/screenforbio-mbc-ailaoshan/releases/tag/1.3).
- 1004 48. Baker, C. C. *Analysis code for Ailaoshan study v1.0* [https://github.com/bakerccm/](https://github.com/bakerccm/ailaoshan/releases/tag/v1.0)  
1005 [ailaoshan/releases/tag/v1.0](https://github.com/bakerccm/ailaoshan/releases/tag/v1.0).
- 1006 49. Zhang, K. Y., Zhang, Y. P., Liu, Y. H. & Li, Y. R. Vertical distribution characteristics  
1007 of rainfall in the Ailao mountain. *Scientia Geographica Sinica* **14**, 144–150 (1994).
- 1008 50. Zhang, Z. Q. Status quo of the biodiversity of Ailaoshan Nature Reserve and counter-  
1009 measures for protection and management. *Forest Inventory and Planning* **32**, 68–70  
1010 (2007).
- 1011 51. Investigation Group of Ailaoshan Nature Reserve. *Comprehensive survey of Ailaoshan*  
1012 *Nature Reserve* (Yunnan Ethnic Press, Kunming, Yunnan, 1988).
- 1013 52. Wu, D. L. & Luo, C. C. Effect of human activity on community structure of small  
1014 mammals in Ailao Mountain. *Zoological Research* **14**, 35–41 (1993).
- 1015 53. Wang, Z. J., Carpenter, C. & Young, S. S. Bird distribution and conservation in the  
1016 Ailao Mountains, Yunnan, China. *Biological Conservation* **92**, 45–57 (2000).
- 1017 54. Li, H., Zhang, X., Rao, D. & Zhang, H. Research on the reptiles diversity in the  
1018 East of Xiping Ailaoshan Nature Reserve. *Hubei Agricultural Sciences* **51**, 3557–  
1019 3559 (2012).
- 1020 55. Luo, W. S., Zhao, S. Y., Luo, Z. Q. & Wang, Q. Population and distribution of  
1021 *Nomascus concolor* in Jingdong jurisdiction of Ailaoshan National Nature Reserve.  
1022 *Sichuan Journal of Zoology* **26**, 600–603 (2007).
- 1023 56. Li, H., Zhu, H., Wang, L. & Liu, J. Biological characteristics and protection of *Tylo-*  
1024 *totriton shanjing* at Mount Ailao in Xiping. *Journal of Chongqing College of Edu-*  
1025 *cation* **23**, 16–18 (2010).
- 1026 57. Li, H. The distribution and perniciousness of *Rhabdophis subminiatus* at Ailaoshan  
1027 in Xiping County. *Hubei Agricultural Sciences* **50**, 800–801 (2011).

- 1028 58. Li, G., Yang, X., Zhang, H. & Li, W. Population and distribution of western black  
1029 crested gibbon (*Nomascus concolor*) at Ailao Mountain, Xinping, Yunnan. *Zoological*  
1030 *Research* **32**, 675–683 (2011).
- 1031 59. Kong, D. *et al.* Status and distribution changes of the endangered green peafowl (*Pavo*  
1032 *muticus*) in China over the past three decades (1990s–2017). *Avian Research* **9**, 427  
1033 (2018).
- 1034 60. R Core Team. *R: A Language and Environment for Statistical Computing* R Foun-  
1035 dation for Statistical Computing (Vienna, Austria, 2019). [https://www.R-project.](https://www.R-project.org/)  
1036 [org/](https://www.R-project.org/).
- 1037 61. Guisan, A., Weiss, S. B. & Weiss, A. D. GLM versus CCA spatial modeling of plant  
1038 species distribution. *Plant Ecology* **143**, 107–122 (1999).
- 1039 62. Taylor, P. G. Reproducibility of ancient DNA sequences from extinct Pleistocene  
1040 fauna. *Molecular Biology and Evolution* **13**, 283–285 (1996).
- 1041 63. Riaz, T. *et al.* ecoPrimers: inference of new DNA barcode markers from whole genome  
1042 sequence analysis. *Nucleic Acids Research* **39**, e145–e145 (2011).
- 1043 64. Leray, M. *et al.* A new versatile primer set targeting a short fragment of the mitochon-  
1044 drial COI region for metabarcoding metazoan diversity: application for characterizing  
1045 coral reef fish gut contents. *Frontiers in Zoology* **10**, 34 (2013).
- 1046 65. Machida, R. J., Leray, M., Ho, S.-L. & Knowlton, N. Metazoan mitochondrial gene  
1047 sequence reference datasets for taxonomic assignment of environmental samples. *Sci-*  
1048 *entific Data* **4**, 170027 (2017). Data downloaded from [http://www.reference-](http://www.reference-midori.info/download.php)  
1049 [midori.info/download.php](http://www.reference-midori.info/download.php) on 9 August 2019.
- 1050 66. Schnell, I. B., Bohmann, K. & Gilbert, M. T. P. Tag jumps illuminated – reducing  
1051 sequence-to-sample misidentifications in metabarcoding studies. *Molecular Ecology*  
1052 *Resources* **15**, 1289–1303 (2015).
- 1053 67. Zepeda-Mendoza, M. L., Bohmann, K., Carmona Baez, A. & Gilbert, M. T. DAME:  
1054 a toolkit for the initial processing of datasets with PCR replicates of double-tagged  
1055 amplicons for DNA metabarcoding analyses. *BMC Research Notes* **9**, 255 (2016).  
1056 Downloaded 9 August 2019 from forked version at [https://github.com/shyamsg/](https://github.com/shyamsg/DAME)  
1057 [DAME](https://github.com/shyamsg/DAME).
- 1058 68. Somervuo, P., Koskela, S., Pennanen, J., Nilsson, R. H. & Ovaskainen, O. Unbiased  
1059 probabilistic taxonomic classification for DNA barcoding. *Bioinformatics* **32**, 2920–  
1060 2927 (2016).
- 1061 69. Somervuo, P. *et al.* Quantifying uncertainty of taxonomic placement in DNA barcod-  
1062 ing and metabarcoding. *Methods in Ecology and Evolution* **8**, 398–407 (2017).
- 1063 70. Rognes, T., Flouri, T., Nichols, B., Quince, C. & Mahé, F. VSEARCH: a versatile  
1064 open source tool for metagenomics. *PeerJ* **4**, e2584 (2016).
- 1065 71. Mahe, F., Rognes, T., Quince, C., de Vargas, C. & Dunthorn, M. Swarm v2: highly-  
1066 scalable and high-resolution amplicon clustering. *PeerJ* **3**, e1420 (2015).
- 1067 72. Frøslev, T. G. *et al.* Algorithm for post-clustering curation of DNA amplicon data  
1068 yields reliable biodiversity estimates. *Nature Communications* **8**, 1188 (2017).
- 1069 73. Mohd Salleh, F. *et al.* An expanded mammal mitogenome dataset from Southeast  
1070 Asia. *GigaScience* **6**, 1–8 (2017).

- 1071 74. Chamberlain, S. *rredlist: 'IUCN' Red List Client* R package version 0.6.0. 2018.  
1072 <https://CRAN.R-project.org/package=rredlist>.
- 1073 75. Mori, E., Nerva, L. & Lovari, S. Reclassification of the serows and gorals: the end of  
1074 a neverending story? *Mammal Review* **49**, 256–262 (2019).
- 1075 76. Phan, T., Nijhawan, S., Li, S. & Xiao, L. *Capricornis sumatraensis*. *The IUCN Red*  
1076 *List of Threatened Species 2020*, e.T162916735A162916910 (2020).
- 1077 77. Jones, K. E. *et al.* PanTHERIA: a species-level database of life history, ecology, and  
1078 geography of extant and recently extinct mammals. *Ecology* **90**, 2648–2648 (2009).
- 1079 78. Dorazio, R. M., Gotelli, N. J. & Ellison, A. M. in *Biodiversity loss in a changing planet*  
1080 (eds Venora, G., Grillo, O. & Lopez-Pujol, J.) 277–302 (InTech, Rijeka, Croatia, 2011).
- 1081 79. Kuo, L. & Mallick, B. Variable selection for regression models. *Sankhyā: The Indian*  
1082 *Journal of Statistics, Series B (1960-2002)* **60**, 65–81 (1998).
- 1083 80. Nichols, J. D. *et al.* Multi-scale occupancy estimation and modelling using multiple  
1084 detection methods. *Journal of Applied Ecology* **45**, 1321–1329 (2008).
- 1085 81. Schmidt, B. R., Kéry, M., Ursenbacher, S., Hyman, O. J. & Collins, J. P. Site oc-  
1086 cupancy models in the analysis of environmental DNA presence/absence surveys: a  
1087 case study of an emerging amphibian pathogen. *Methods in Ecology and Evolution* **4**,  
1088 646–653 (2013).
- 1089 82. Hunter, M. E. *et al.* Environmental DNA (eDNA) sampling improves occurrence and  
1090 detection estimates of invasive Burmese pythons. *PLoS ONE* **10**, e0121655 (2015).
- 1091 83. Dorazio, R. M. & Erickson, R. A. eDNAoccupancy: An R package for multiscale  
1092 occupancy modelling of environmental DNA data. *Molecular Ecology Resources* **18**,  
1093 368–380 (2018).
- 1094 84. Rubin, D. B. Bayesianly justifiable and relevant frequency calculations for the applied  
1095 statistician. *The Annals of Statistics* **12**, 1151–1172 (1984).
- 1096 85. Link, W. A. & Sauer, J. R. Extremes in ecology: avoiding the misleading effects of  
1097 sampling variation in summary analyses. *Ecology* **77**, 1633–1640 (1996).
- 1098 86. Plummer, M. *JAGS: A program for analysis of Bayesian graphical models using Gibbs*  
1099 *sampling* Version 4.3.0. 2017. <https://sourceforge.net/projects/mcmc-jags>.
- 1100 87. Hsieh, T. C., Ma, K. H. & Chao, A. *iNEXT: Interpolation and Extrapolation for*  
1101 *Species Diversity* R package version 2.0.20. 2020. [http://chao.stat.nthu.edu.tw/](http://chao.stat.nthu.edu.tw/wordpress/software_download/)  
1102 [wordpress/software\\_download/](http://chao.stat.nthu.edu.tw/wordpress/software_download/).
- 1103 88. Kéry, M. & Royle, J. A. *Applied Hierarchical Modeling in Ecology* ISBN: 978-0-12-  
1104 801378-6 (Elsevier, London, UK, 2016).
- 1105 89. Escoufier, Y. Le traitement des variables vectorielles. *Biometrics* **29**, 751–760 (1973).
- 1106 90. Davies, R. W., Linton, L. R. & Wrona, F. J. Passive dispersal of four species of  
1107 freshwater leeches (Hirudinoidea) by ducks. *Freshwater Invertebrate Biology* **1**, 40–44  
1108 (1982).
- 1109 91. Rota, C. T., Fletcher Jr, R. J., Dorazio, R. M. & Betts, M. G. Occupancy estimation  
1110 and the closure assumption. *Journal of Applied Ecology* **46**, 1173–1181 (2009).
- 1111 92. Liu, S. *et al.* Mitochondrial capture enriches mito-DNA 100 fold, enabling PCR-free  
1112 mitogenomics biodiversity analysis. *Molecular Ecology Resources* **16**, 470–479 (2016).

- 1113 93. Ackerman, C. M. *et al.* Massively multiplexed nucleic acid detection with Cas13.  
1114 *Nature* **582**, 277–282 (2020).
- 1115 94. Hebert, P. D. N., Hollingsworth, P. M. & Hajibabaei, M. From writing to reading  
1116 the encyclopedia of life. *Philosophical Transactions of the Royal Society B: Biological*  
1117 *Sciences* **371**, 20150321 (2016).
- 1118 95. Gogarten, J. F. *et al.* Fly-derived DNA and camera traps are complementary tools  
1119 for assessing mammalian biodiversity. *Environmental DNA* **2**, 63–76 (2019).
- 1120 96. Royle, J. A. & Link, W. A. Generalized site occupancy models allowing for false  
1121 positive and false negative errors. *Ecology* **87**, 835–841 (2006).
- 1122 97. Miller, D. A. *et al.* Improving occupancy estimation when two types of observa-  
1123 tional error occur: non-detection and species misidentification. *Ecology* **92**, 1422–  
1124 1428 (2011).
- 1125 98. Griffin, J. E., Matechou, E., Buxton, A. S., Bormpoudakis, D. & Griffiths, R. A.  
1126 Modelling environmental DNA data; Bayesian variable selection accounting for false  
1127 positive and false negative errors. *Journal of the Royal Statistical Society: Series C*  
1128 *(Applied Statistics)* **69**, 377–392 (2020).
- 1129 99. Royle, J. A. & Nichols, J. D. Estimating abundance from repeated presence–absence  
1130 data or point counts. *Ecology* **84**, 777–790 (2003).
- 1131 100. Royle, J. A. N-mixture models for estimating population size from spatially replicated  
1132 counts. *Biometrics* **60**, 108–115 (2004).
- 1133 101. Wood, C. M. *et al.* Detecting small changes in populations at landscape scales: a  
1134 bioacoustic site-occupancy framework. *Ecological Indicators* **98**, 492–507 (2019).
- 1135 102. Kampmann, M.-L. *et al.* Leeches as a source of mammalian viral DNA and RNA - a  
1136 study in medicinal leeches. *European Journal of Wildlife Research* **63**, 36 (2017).
- 1137 103. Gibb, R. *et al.* Zoonotic host diversity increases in human-dominated ecosystems.  
1138 *Nature* **584**, 398–402 (2020).
- 1139 104. Visconti, P. *et al.* Protected area targets post-2020. *Science* **364**, 239–241 (6437 2019).
- 1140 105. Bush, A. *et al.* Connecting Earth observation to high-throughput biodiversity data.  
1141 *Nature Ecology and Evolution* **1**, 0176 (2017).
- 1142 106. Csárdi, G. & Nepusz, T. The igraph software package for complex network research.  
1143 *InterJournal Complex Systems*, 1695 (2006).

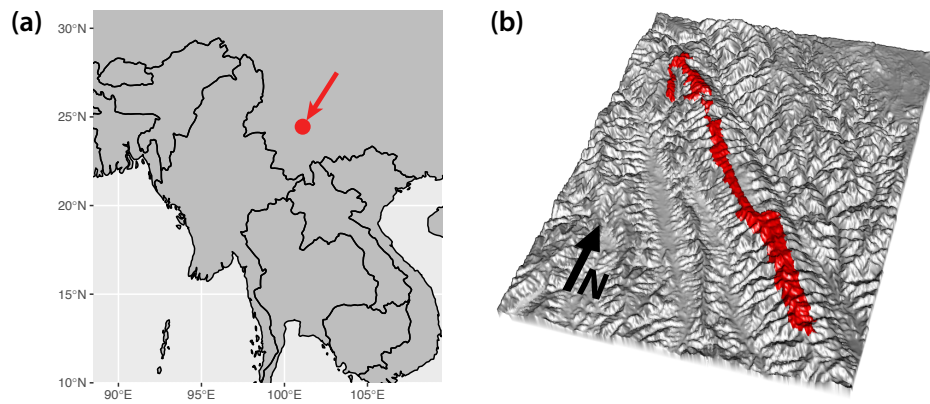

**Figure 1:** (a) Ailaoshan Nature Reserve is located in Yunnan Province, southwest China. (b) Ailaoshan Nature Reserve runs northwest-to-southeast along a ridgeline for around 125 km, but averages just 6 km across along its entire length.



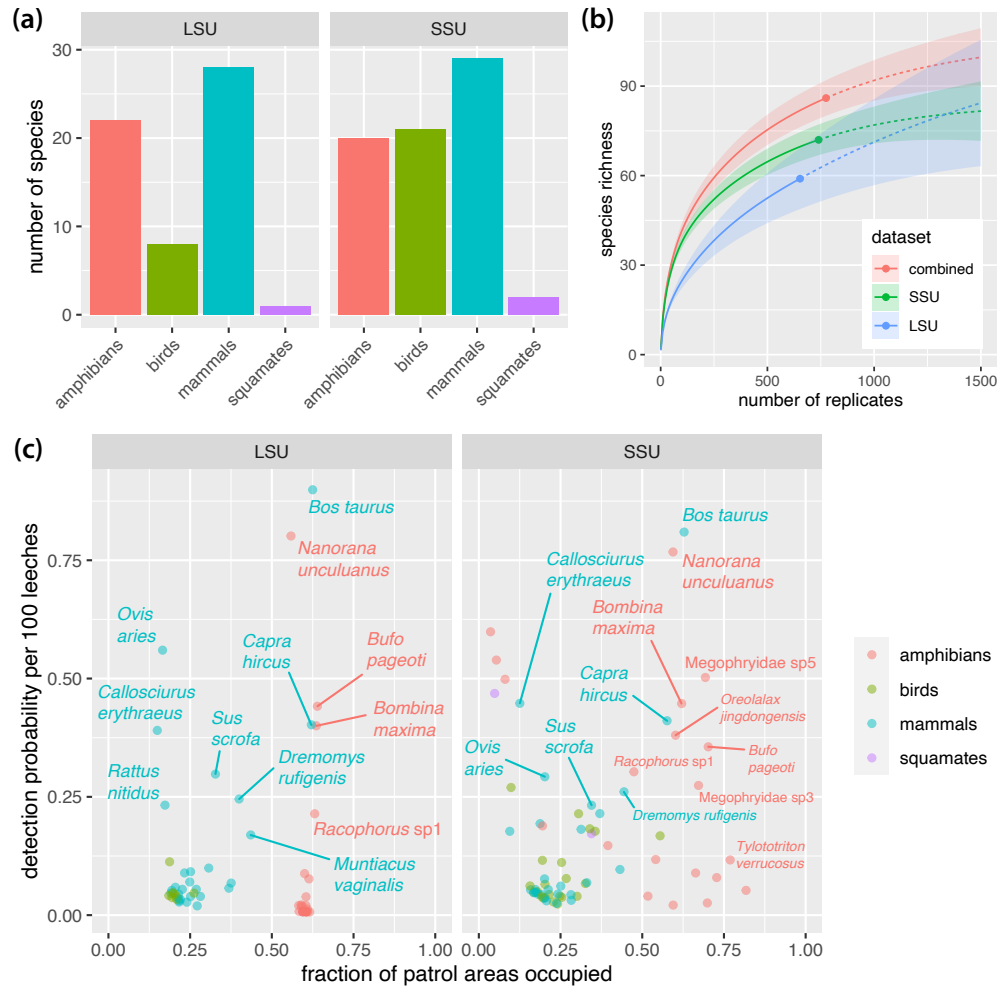

**Figure 2:** (a) Distribution of species detected in each dataset by taxonomic group. (b) Species richness sampling curves calculated using replicates as sampling units. Solid portions of curves represent interpolated values; dashed portions represent extrapolations beyond the observed values shown with solid circles. Error bands show 95% confidence intervals. (c) Estimated site occupancy and detection probabilities for each species. Taxa with low occupancy and detection probabilities are unlabelled for clarity; see Supplementary File S1 for full listing of results.

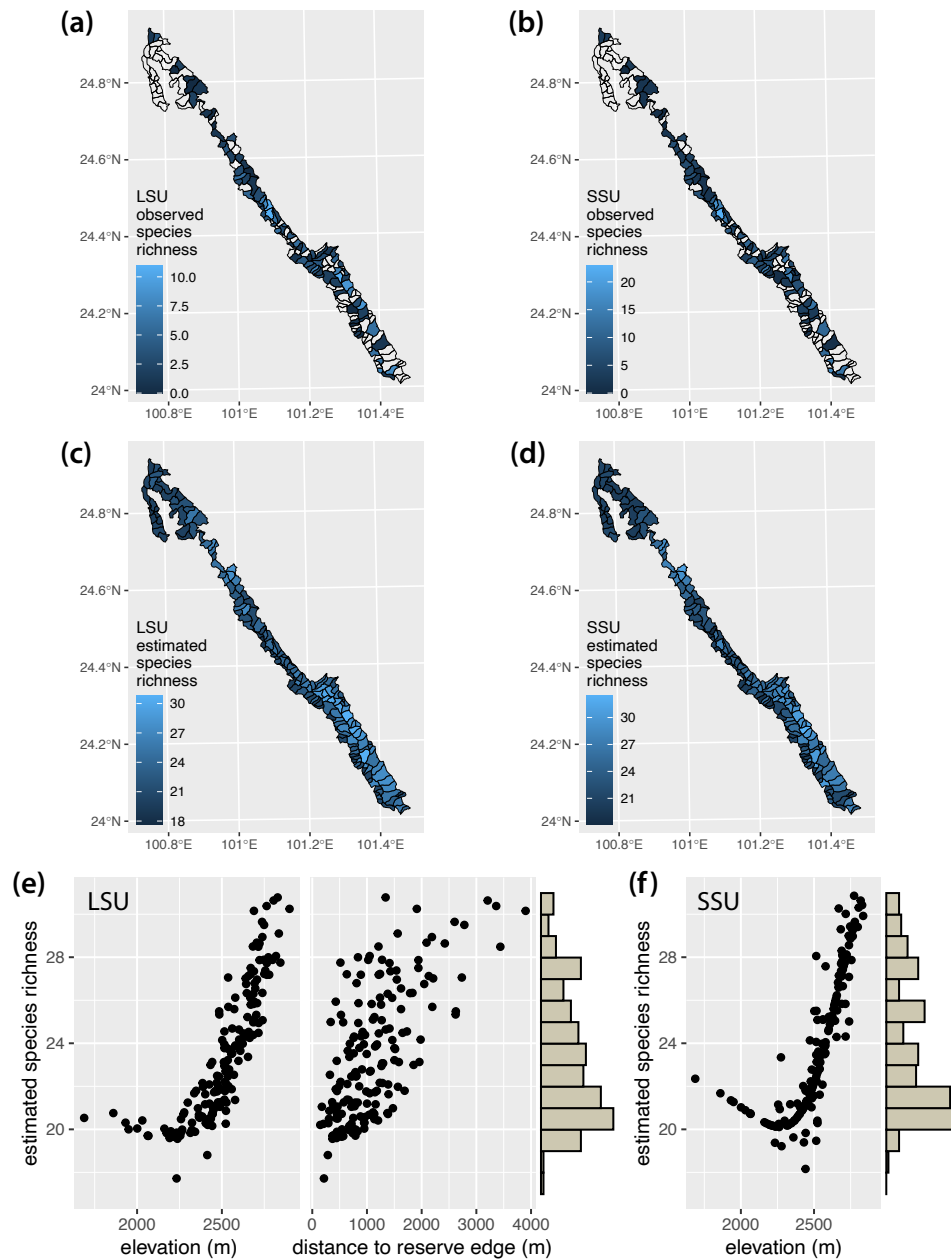

**Figure 3:** (a,b) Observed species richness in each patrol area in the LSU and SSU datasets respectively. Note missing data from approximately half of the patrol areas. Data with missing patrol area IDs are not represented in this figure, though they are incorporated in our occupancy model. (c,d) Estimated species richness for each patrol area in the LSU and SSU datasets respectively. Note that our occupancy model provides estimates for patrol areas with missing data, in addition to augmenting observed values to account for false negatives. (e,f) Scatterplots of estimated species richness against environmental covariates in the LSU and SSU models respectively. Histograms along the  $y$ -axes show the distribution of species richness estimates across the patrol areas.

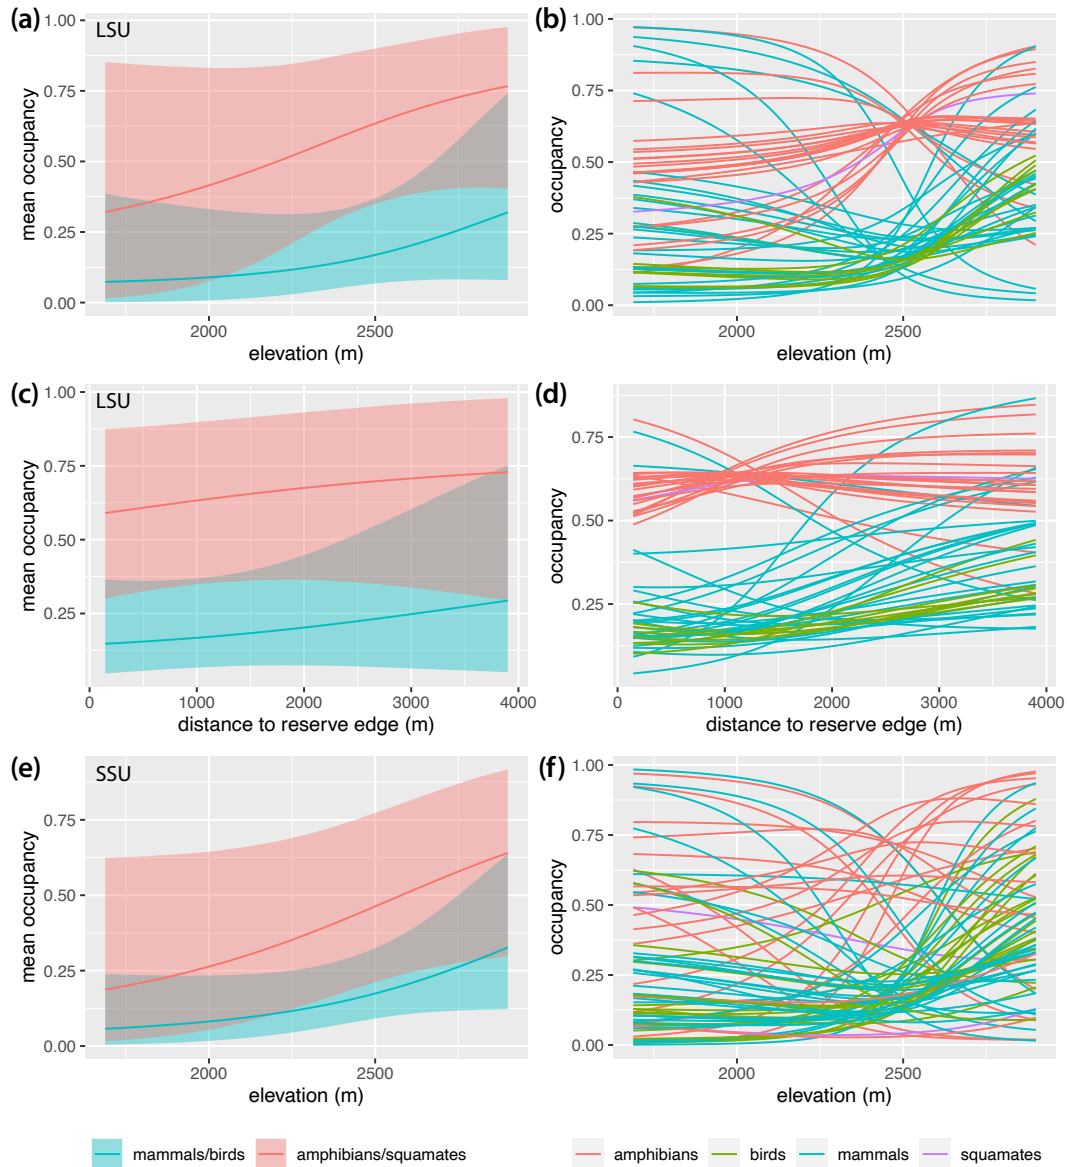

**Figure 4:** (a) Community mean occupancy estimates and (b) occupancy estimates for each species as a function of elevation in the LSU dataset, holding distance to reserve edge fixed at its mean value. (c) Community mean occupancy estimates and (d) occupancy estimates for each species as a function of distance to reserve edge in the LSU dataset, holding elevation fixed at its mean value. (e) Community mean occupancy estimates and (f) occupancy estimates for each species as a function of elevation in the SSU dataset, holding distance to reserve edge fixed at its mean value. Lines in all panels show posterior means. Shaded areas in panels (a), (c) and (e) show 95% Bayesian confidence intervals.

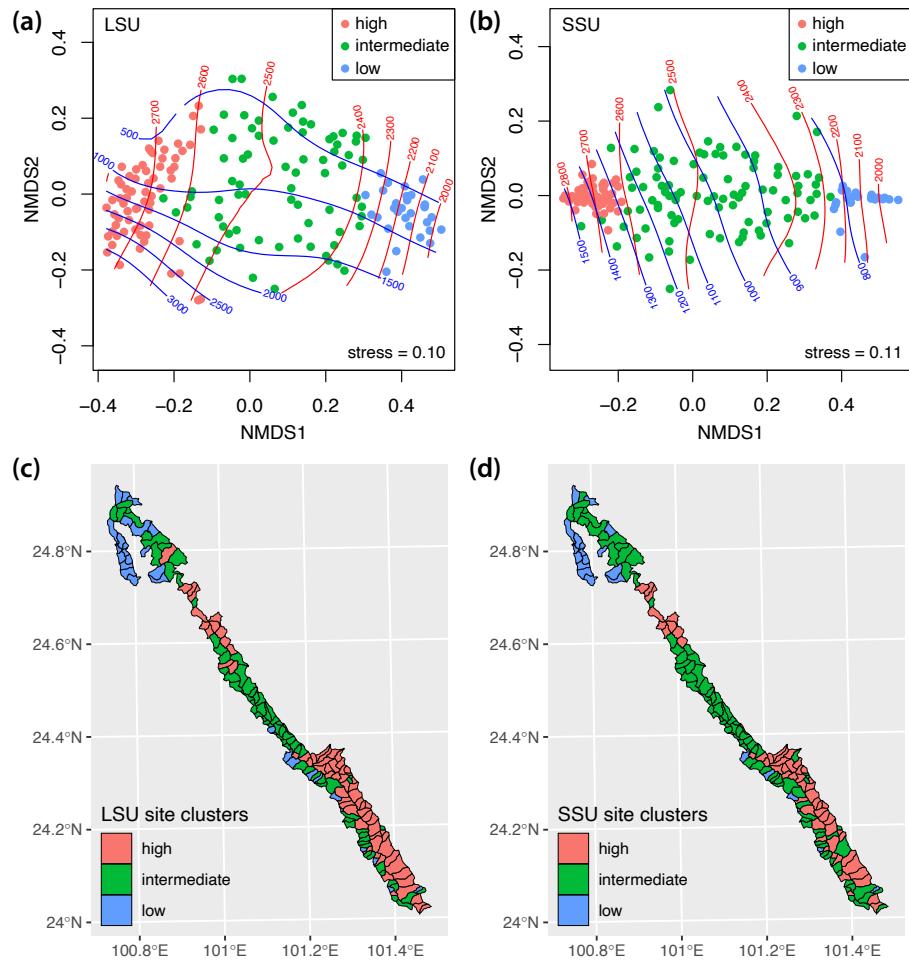

**Figure 5:** (a,b) Non-metric multidimensional scaling plots representing mean pairwise Jaccard distances among patrol areas. Each point represents a single patrol area, colored according to the cluster that it falls into (see Figure S8). Red and blue contours show elevation and distance to the reserve edge respectively (both in metres). Clusters correspond broadly to high-, intermediate- and low-elevation sites. (c,d) Maps showing distribution of clusters across the Ailaoshan nature reserve.

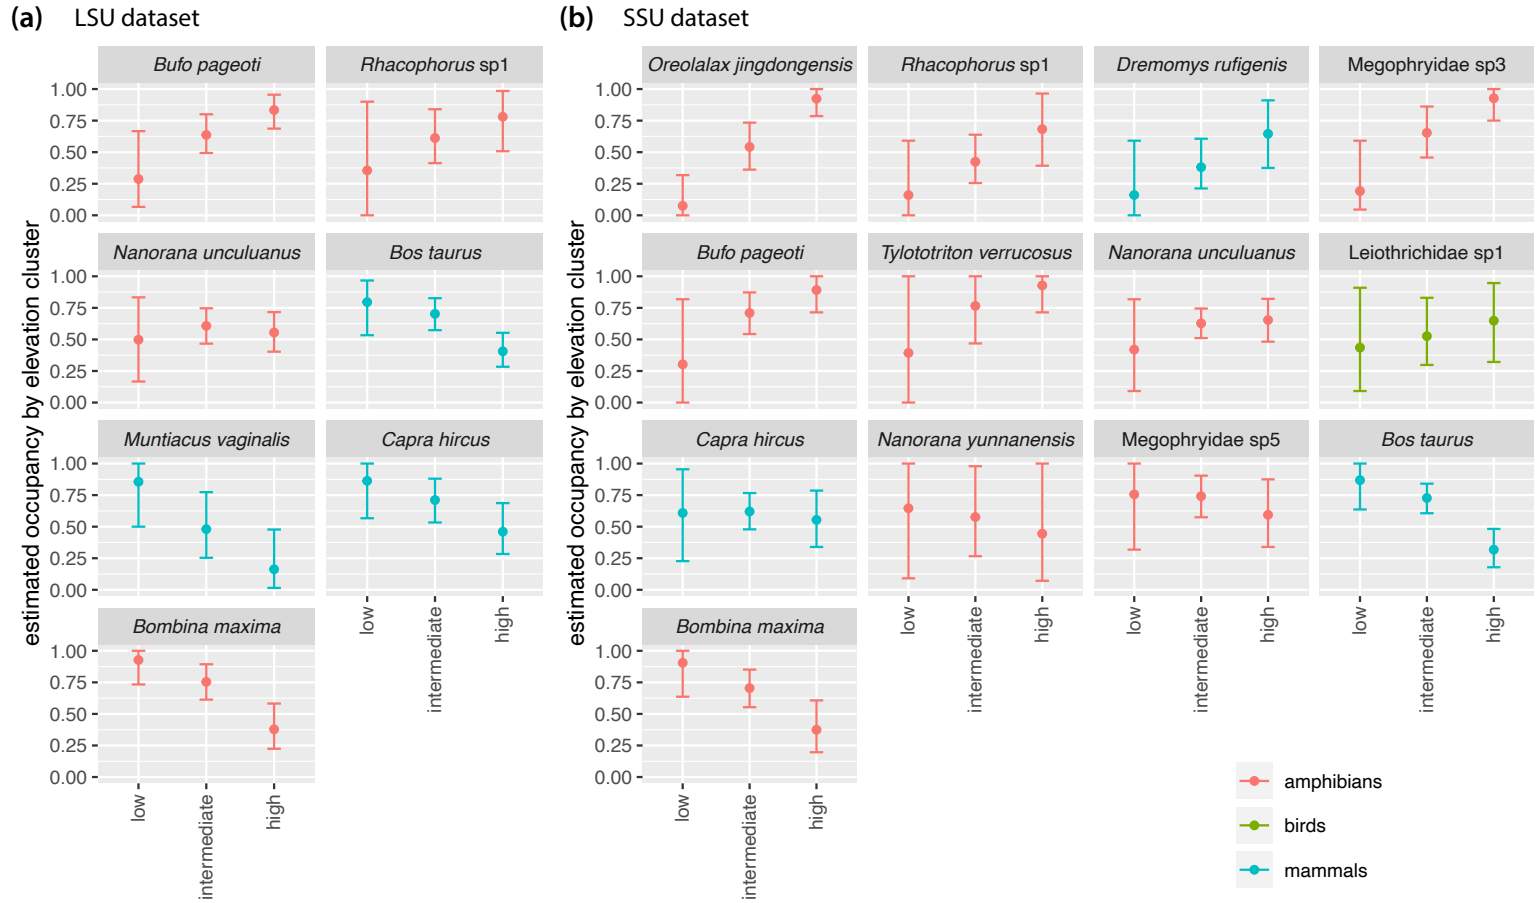

**Figure 6:** Estimated occupancy in low-, intermediate- and high-elevation patrol areas for selected species in **(a)** the LSU dataset and **(b)** the SSU dataset. Figure shows posterior means for fraction of sites occupied, with 95% Bayesian confidence intervals. Patrol areas were divided into low-, intermediate- and high-elevation by clustering based on posterior mean Jaccard distances as shown in Figures 5 and S8. Species shown are those with posterior mean occupancy  $\geq 0.4$  and posterior mean detection  $\geq 0.1$  calculated across all patrol areas. Results for all species are shown in Figures S9 and S10.

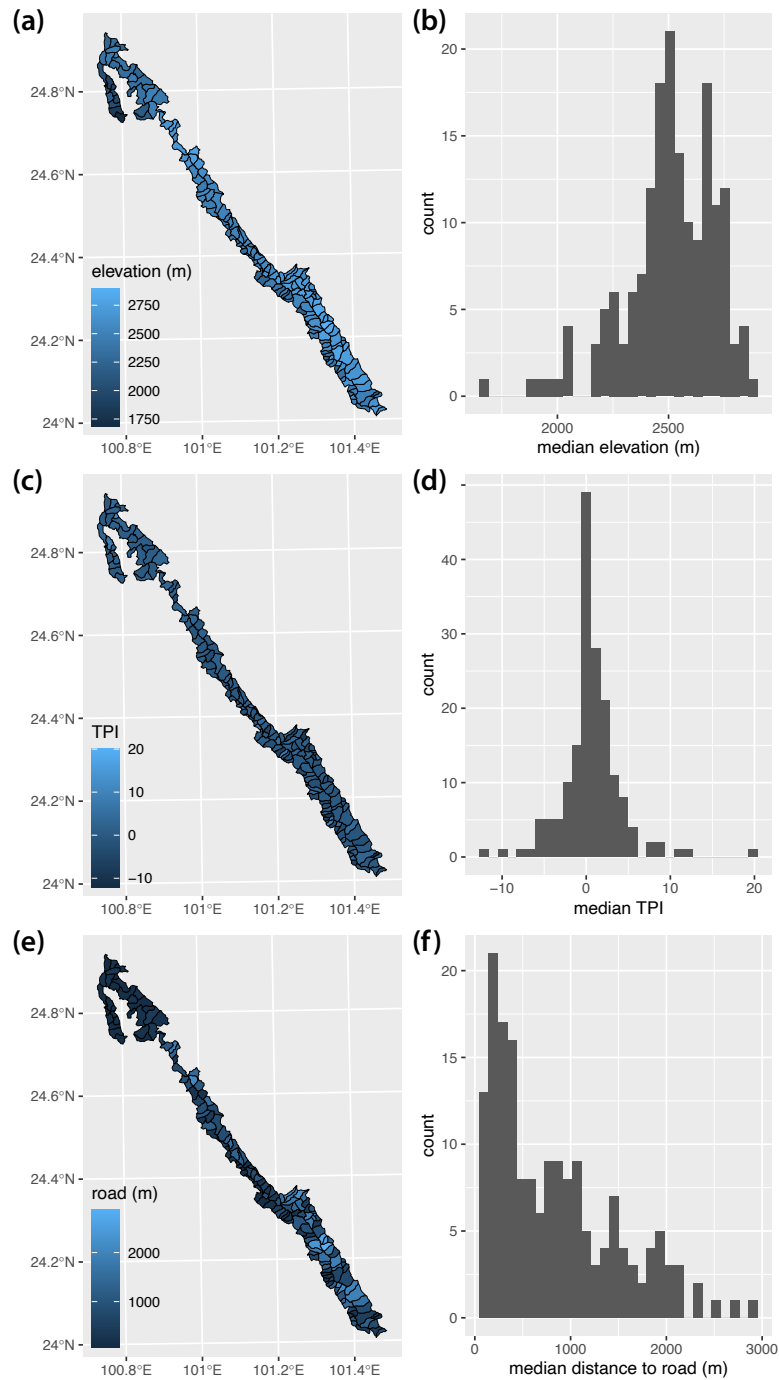

**Figure S1:** Maps and histograms for environmental covariates used in occupancy modelling. (a,b) Median elevation. (c,d) Median topographic position index (TPI). (e,f) Median distance to nearest road.

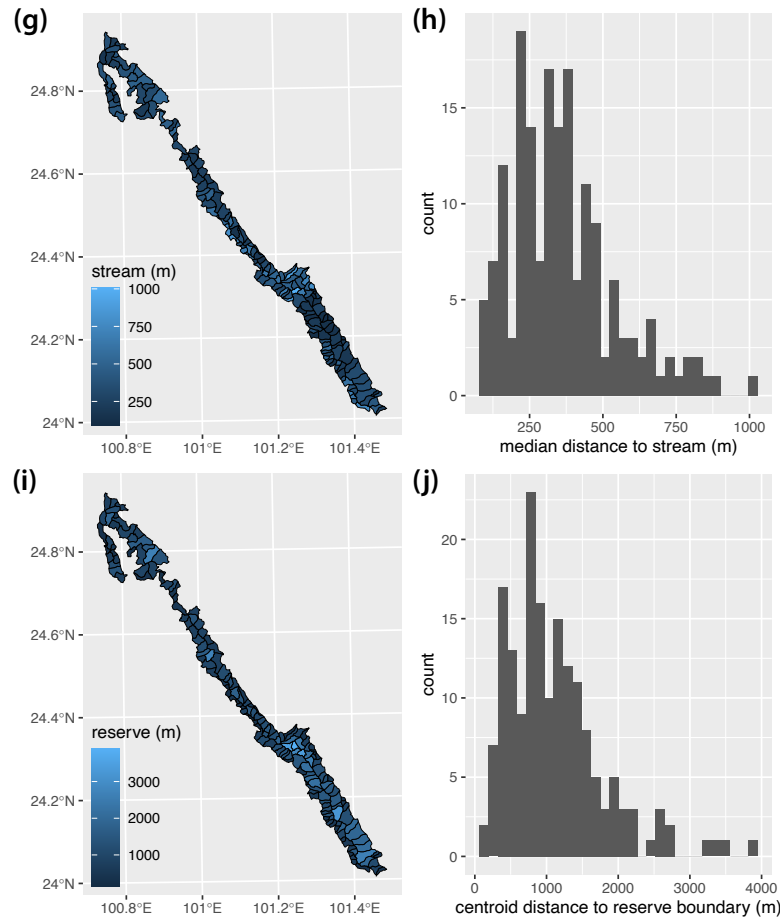

**Figure S1: (continued)** Maps and histograms for environmental covariates used in occupancy modelling. **(g,h)** Median distance to nearest stream. **(i,j)** Distance from patrol area centroid to nearest reserve edge.

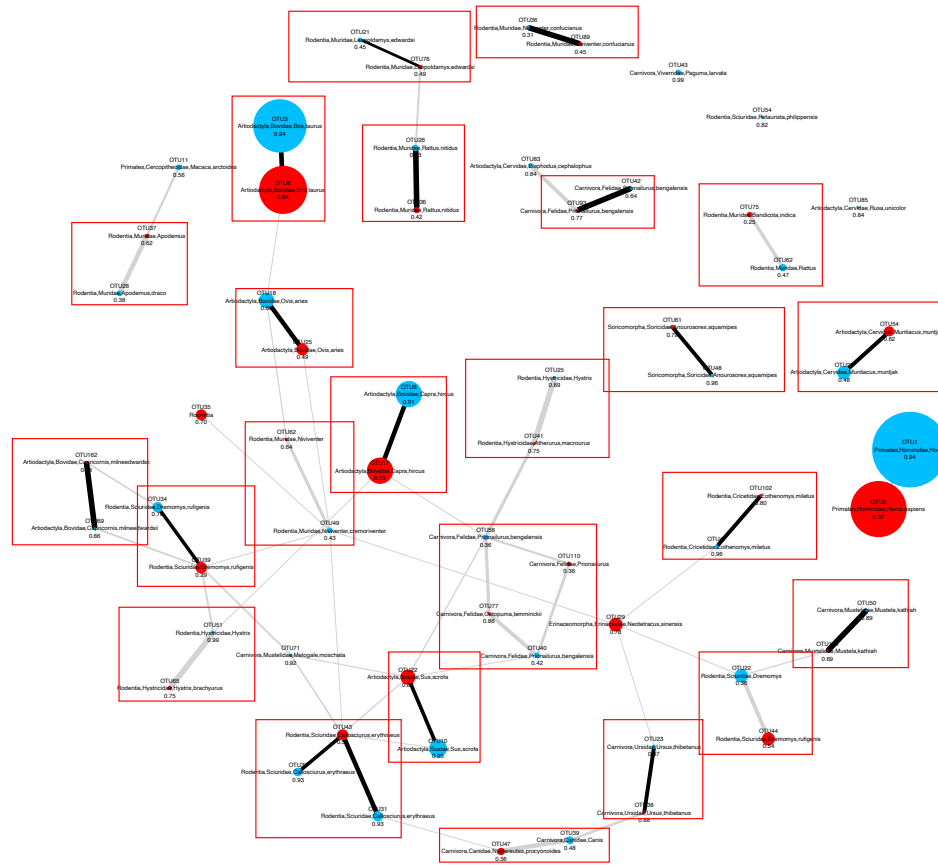

**Figure S2:** Bipartite network visualization of pairwise Spearman correlations between mammal LSU and SSU pre-OTU across lab replicates. Blue and red nodes represent pre-OTUs from the LSU and SSU datasets respectively. The size of each node is proportional to the square-root transformed occupancy of the pre-OTU calculated across lab replicates (i.e. the fraction of replicates in which the pre-OTU was detected). Each node is labelled with the lowest taxonomic assignment that was not missing or unknown, as well as the PROTAX probability for that assignment. For every pair of LSU and SSU pre-OTUs, we calculated the Spearman correlation of read counts across lab replicates. We discarded any correlations that were  $< 0.1$ , or that were not significant at  $\alpha = 0.5$  after false discovery rate correction. We drew a bipartite graph using the package `igraph` [106] with the remaining correlations as edge weights connecting nodes representing the pre-OTUs. Thicker edges thus indicate higher correlation coefficients. Edges are shown in black where they join nodes with the same lowest taxonomic assignment, and are otherwise shown in grey. Red boxes show manually assigned groupings of pre-OTUs that were deemed to be the same taxon. For example, at the bottom of the figure, pre-OTU38 (SSU) and pre-OTU23 (LSU) were both assigned to the Asiatic black bear, *Ursus thibetanus*, and the thick line indicates that these OTUs were found in (nearly) the same subset of replicates, as expected if the two OTUs were amplified from the same bloodmeals and thus from the same individual mammals. Also at the bottom of the figure, pre-OTU47 (SSU) was assigned to Canidae, *Nyctereutes procyonoides*, but pre-OTU39 (LSU) was assigned to Canidae, *Canis*. Given that these OTUs were also found in nearly the same subset of replicates, we conclude that pre-OTU39 is also *N. procyonoides*.



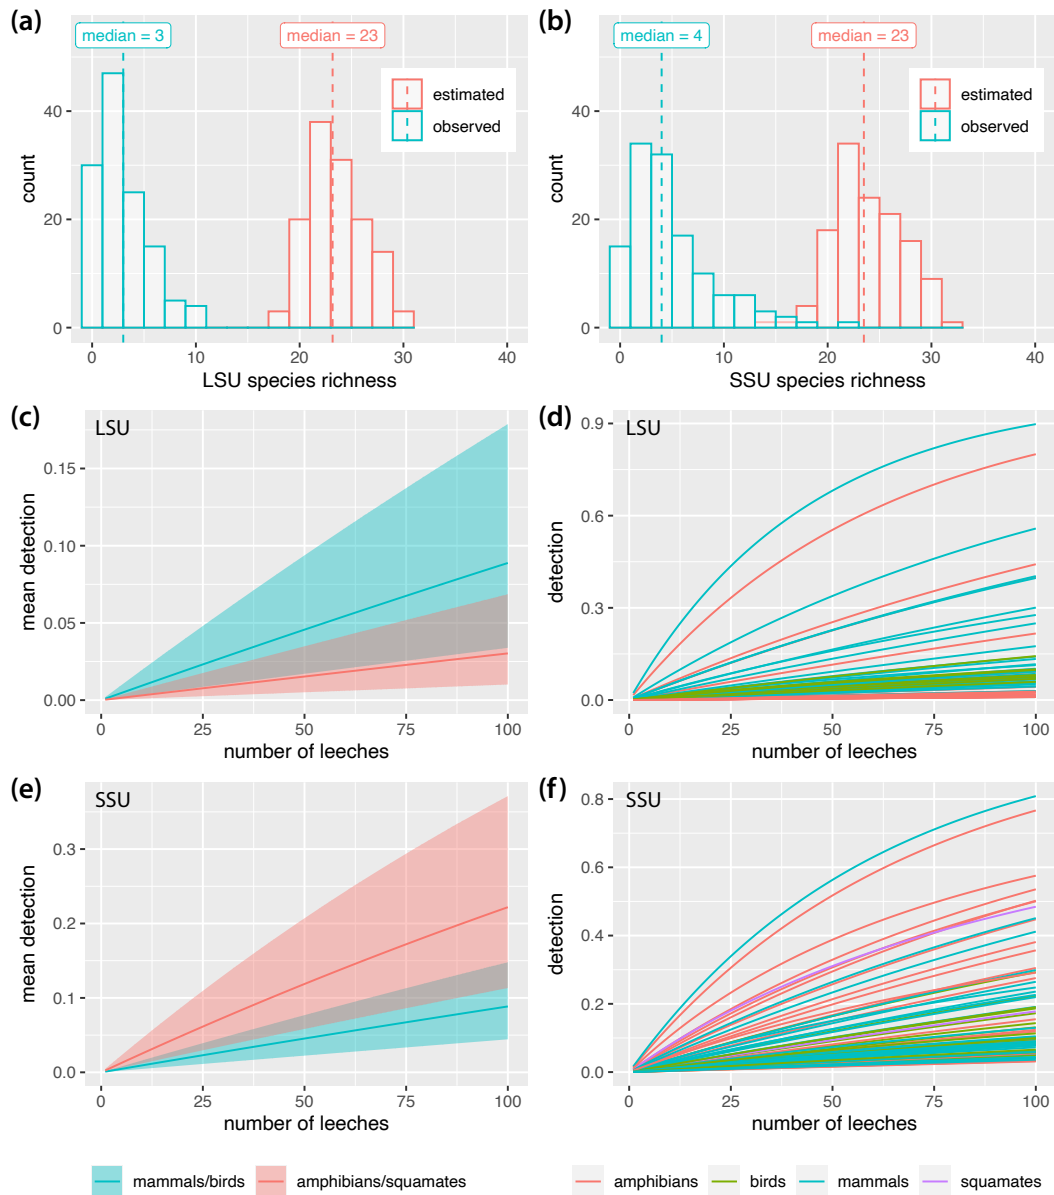

**Figure S3:** Histograms of observed and estimated species richness per patrol area in (a) the LSU and (b) the SSU datasets respectively. Dashed lines in panels (a) and (b) show median values. (c) Community mean detection estimates and (d) detection estimates for each species as a function of number of leeches per replicate in the LSU dataset. (e) Community mean detection estimates and (f) detection estimates for each species as a function of number of leeches per replicate in the SSU dataset. Lines in panels (c) through (f) show posterior means. Shaded areas in panels (c) and (e) show 95% Bayesian confidence intervals.

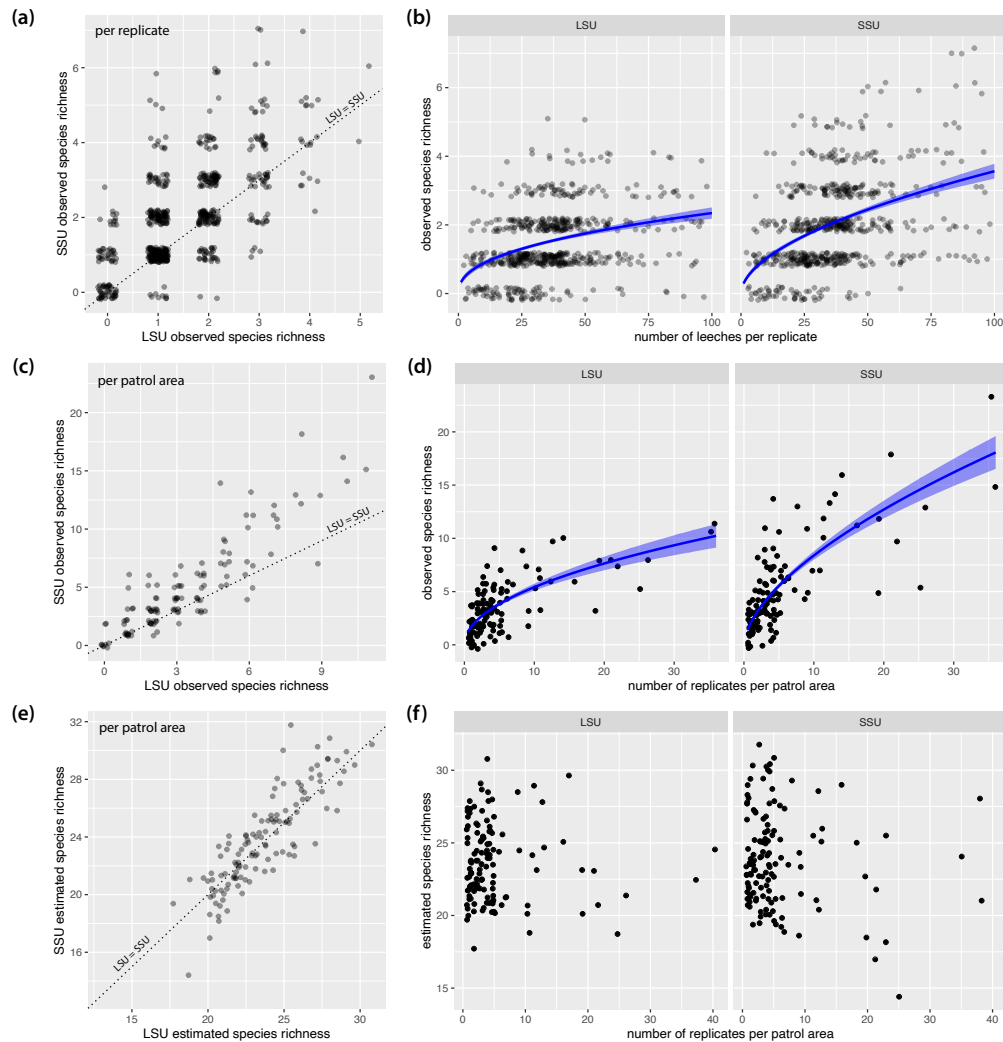

**Figure S4:** (a) Observed species richness per replicate was positively correlated between the LSU and SSU datasets ( $r = 0.65$ ;  $t_{616} = 21.2$ ,  $p < 0.001$ ). (b) More species tended to be detected in replicates with more leeches. Blue curves show predicted values from Poisson GLMs of species richness against log-transformed number of leeches per replicate (slopes:  $z = 6.9$ ,  $p < 0.001$  for LSU and  $z = 10.0$ ,  $p < 0.001$  for SSU); shaded areas show  $\pm$  standard error. (c) Observed species richness per patrol area was positively correlated between the LSU and SSU datasets ( $r = 0.89$ ;  $t_{120} = 20.8$ ,  $p < 0.001$ ). (d) More species tended to be detected in patrol areas with more replicates. Blue curves show predicted values from Poisson GLMs of species richness against log-transformed number of replicates per patrol area (slopes:  $z = 10.2$ ,  $p < 0.001$  for LSU and  $z = 14.9$ ,  $p < 0.001$  for SSU); shaded areas show  $\pm$  standard error. (e) Estimated species richness per patrol area was positively correlated between the LSU and SSU datasets ( $r = 0.86$ ;  $t_{120} = 18.4$ ,  $p < 0.001$ ). (f) In contrast to observed species richness, estimated species richness did not increase with number of replicates per patrol area, as the occupancy model corrects for variation in sampling effort. Slope coefficients for least-squares regressions of estimated species richness against log-transformed number of replicates per patrol area were non-significant (LSU:  $F_{1,124} = 0.04$ ,  $p = 0.85$ ; SSU:  $F_{1,125} = 1.6$ ,  $p = 0.22$ ). Points in all plots are jittered to allow overlapping points to be visualized.

LSU dataset

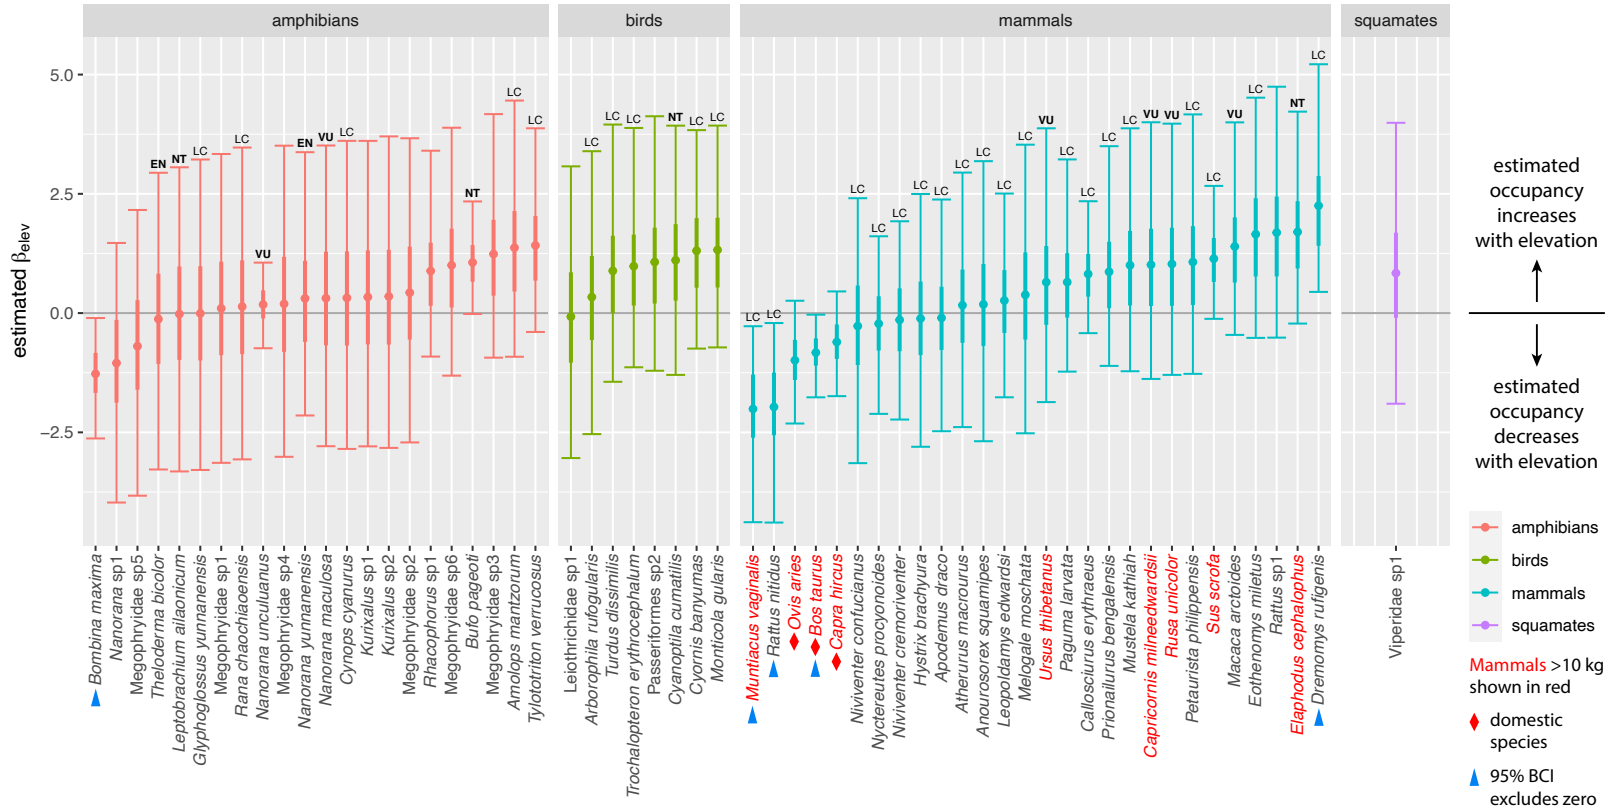

**Figure S5:** Estimated occupancy slope coefficients on elevation from the LSU model. For each species, plot shows posterior mean (dot), interquartile range (thick line) and 95% Bayesian confidence interval (BCI; thin line with crossbars). Slope coefficients are shown on the logit scale, so positive coefficients correspond to occupancy increasing with elevation. Within taxonomic groups, species are ordered by slope coefficient. Blue triangles mark species whose 95% BCI excludes zero. Annotations above bars denote IUCN categories: LC = Least Concern; NT = Near Threatened; VU = Vulnerable; EN = Endangered. Categories NT and above are shown in bold. Taxa without annotations have not been assigned a category by the IUCN. Species names for mammals over 10 kg adult body mass are shown in red. Domestic species are denoted with red diamonds.

## LSU dataset

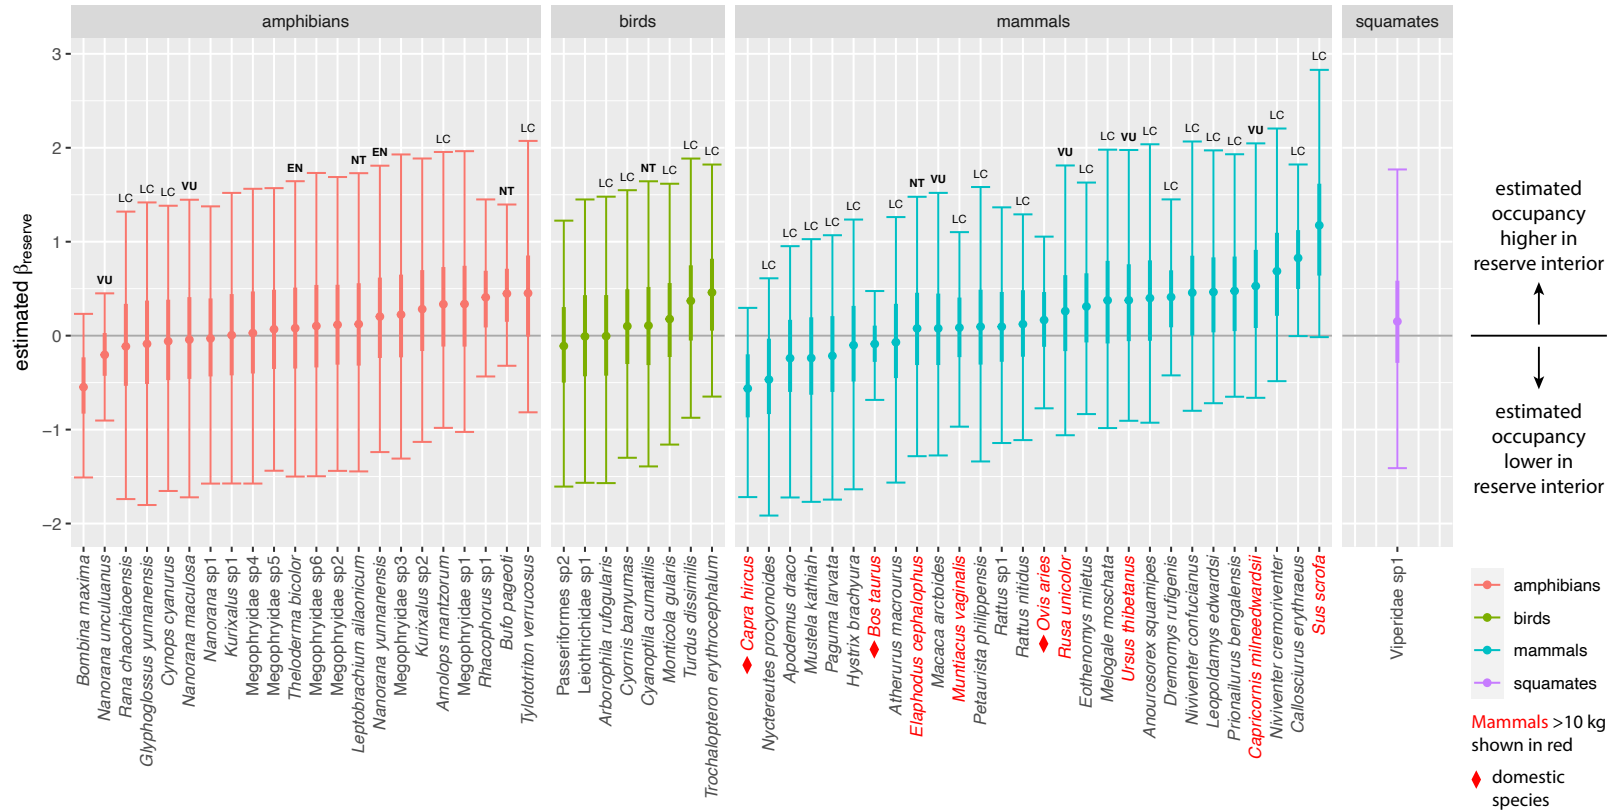

**Figure S6:** Estimated occupancy slope coefficients on distance to reserve edge from the LSU model. For each species, plot shows posterior mean (dot), interquartile range (thick line) and 95% Bayesian confidence interval (BCI; thin line with crossbars). Slope coefficients are shown on the logit scale, so positive coefficients correspond to occupancy increasing with distance to reserve edge. Within taxonomic groups, species are ordered by slope coefficient. No species had a 95% BCI that excluded zero. Annotations above bars denote IUCN categories: LC = Least Concern; NT = Near Threatened; VU = Vulnerable; EN = Endangered. Categories NT and above are shown in bold. Taxa without annotations have not been assigned a category by the IUCN. Species names for mammals over 10 kg adult body mass are shown in red. Domestic species are denoted with red diamonds.

## SSU dataset

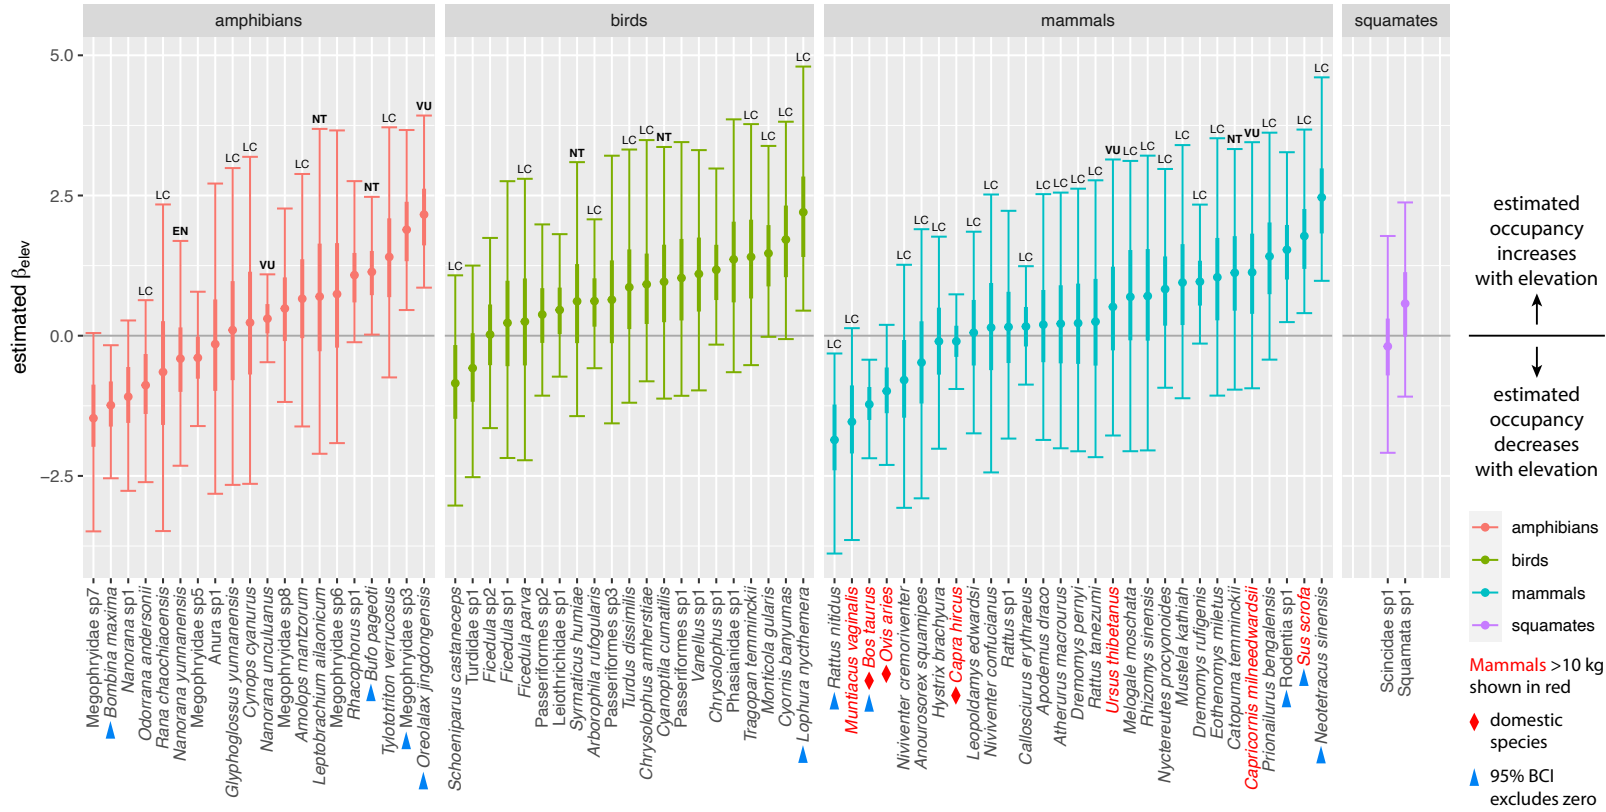

**Figure S7:** Estimated occupancy slope coefficients on elevation from the SSU model. For each species, plot shows posterior mean (dot), interquartile range (thick line) and 95% Bayesian confidence interval (BCI; thin line with crossbars). Slope coefficients are shown on the logit scale, so positive coefficients correspond to occupancy increasing with elevation. Within taxonomic groups, species are ordered by slope coefficient. Blue triangles mark species whose 95% BCI excludes zero. Annotations above bars denote IUCN categories: LC = Least Concern; NT = Near Threatened; VU = Vulnerable; EN = Endangered. Categories NT and above are shown in bold. Taxa without annotations have not been assigned a category by the IUCN. Species names for mammals over 10 kg adult body mass are shown in red. Domestic species are denoted with red diamonds.



## LSU dataset

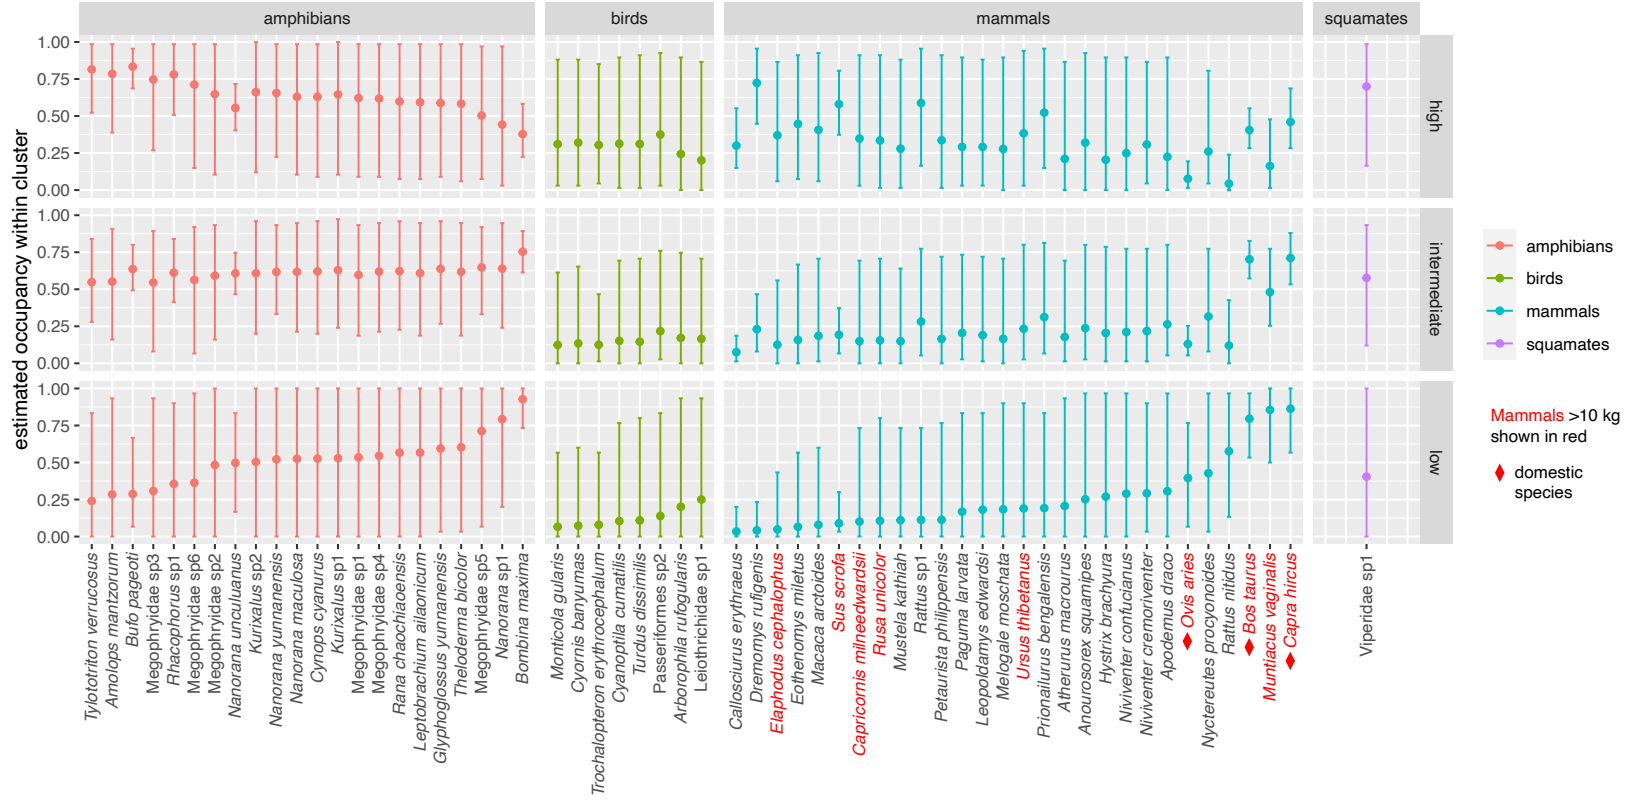

**Figure S9:** Estimated occupancy in high-, intermediate- and low-elevation patrol areas for species in the LSU dataset. Figure shows posterior means for fraction of sites occupied, with 95% Bayesian confidence intervals. Patrol areas were divided into high-, intermediate- and low-elevation by clustering based on Jaccard distances as shown in Figures 5a,c and S8a. Within taxonomic groups, species are ordered by occupancy in low-elevation sites. Species names for mammals over 10 kg adult body mass are shown in red. Domestic species are denoted with red diamonds.

## SSU dataset

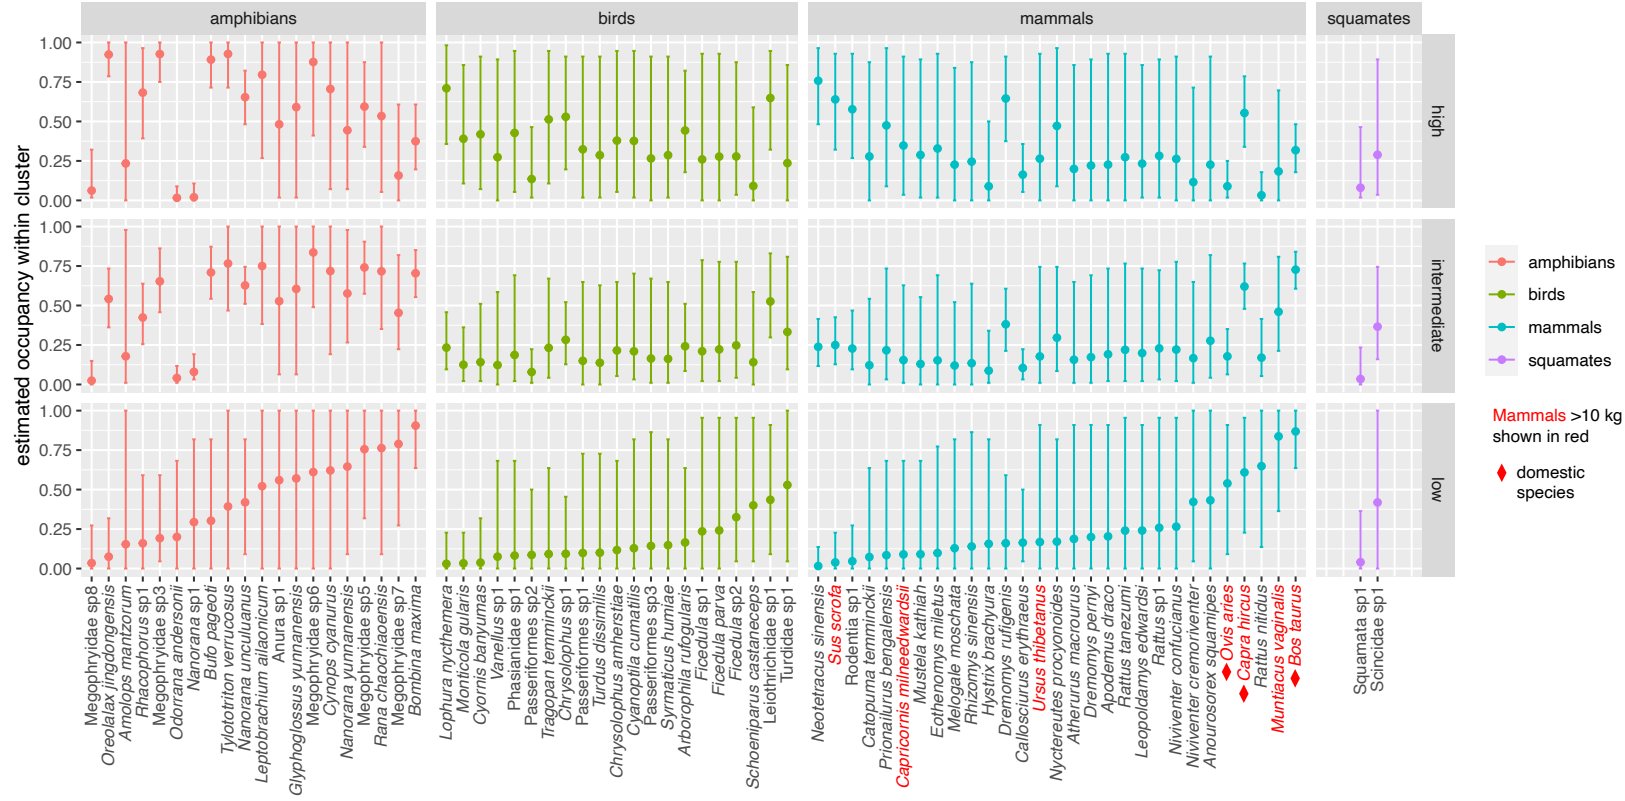

**Figure S10:** Estimated occupancy in high-, intermediate- and low-elevation patrol areas for species in the SSU dataset. Figure shows posterior means for fraction of sites occupied, with 95% Bayesian confidence intervals. Patrol areas were divided into high-, intermediate- and low-elevation by clustering based on Jaccard distances as shown in Figures 5b,d and S8b. Within taxonomic groups, species are ordered by occupancy in low-elevation sites. Species names for mammals over 10 kg adult body mass are shown in red. Domestic species are denoted with red diamonds.
