# Supplementary material for: Measuring protected-area outcomes with leech iDNA: large-scale quantification of vertebrate biodiversity in Ailaoshan nature reserve
Source: bioRxiv or medRxiv preprint supplement (doi:10.1101/2020.02.10.941336), 2021-08-31
Supplement: Supplementary file [file media-2.pdf]

# 1 Large-scale Quantification of Vertebrate Biodiversity in 2 Ailaoshan Nature Reserve from Leech iDNA

## 3 Supplementary Methods

### 4 1 Laboratory processing

5 *DNA extraction.* We extracted DNA from each replicate sample following the protocol  
6 in [31]. Leeches were transferred to a new tube to remove the preservative, soaked in a  
7 volume of digestion buffer (10 mM Tris-HCl, 10 mM NaCl, 2% SDS, 5 mM CaCl<sub>2</sub>, 2.5 mM  
8 EDTA, 40 mM dithiothreitol, and 0.2 mg/ml proteinase K) equal to 5 times the volume of  
9 each sample's leeches, and incubated at 55 °C (rotating) until all the leeches were dissolved.  
10 Following this incubation, we aliquoted 0.6 ml of digestion buffer from each sample for  
11 purification with the QIAquick PCR purification kit (Qiagen, Hilden, Germany). To detect  
12 any DNA cross-contamination, negative controls were created in both steps, digestion and  
13 purification.

14 *PCR amplification.* We PCR-amplified two mitochondrial markers, one  
15 from the 16S rRNA (MT-RNR2) gene using the primers *16Smam1*  
16 forward 5'-CGGTTGGGGTGACCTCGGA-3' and *16Smam2* reverse  
17 5'-GCTGTTATCCCTAGGGTAACT-3' [38], and the other from the 12S rRNA (MT-  
18 RNR1) gene with the primers (forward: 5'-ACTGGGATTAGATACCCC-3' and reverse:  
19 5'-YRGAACAGGCTCCTCTAG-3') modified from [26]. Target fragments were 81 to 117  
20 bp and 82 to 150 bp respectively, excluding primers. We hereafter refer to these two  
21 markers as LSU (16S) and SSU (12S), respectively, referring to the ribosomal large subunit  
22 and small subunit that these genes code for. The LSU primers are designed to target  
23 mammals, and the SSU primers to amplify all vertebrates. A third primer pair targeting  
24 the standard cytochrome *c* oxidase I marker [14] was tested but not adopted in this study  
25 as it co-amplified leech DNA and consequently returned few vertebrate reads.

26 Primers were ordered with sample-identifying tag sequences. To be able to identify (and  
27 remove) 'tag jumping' errors [30], we used a 'twin-tagging strategy,' meaning that both  
28 forward and reverse primers used the same tag sequence for a sample (e.g. F1/R1, F2/R2,  
29 F3/R3). Thus, if a library contained tag combinations F1/R1, F2/R2, and F3/R3, an  
30 F1 tag-jump would produce F1/R2 or F1/R3, which could be detected and removed, since  
31 these combinations were not used in this library. We used the DAME protocol [40] to remove  
32 these tag-jumped Illumina reads and to identify and remove reads containing PCR and/or  
33 sequencing errors. The DAME protocol PCR-amplifies each sample three times per marker,  
34 each time with a different twin-tag pair, which allows the PCRs to be individually identified  
35 after sequencing. Reads containing errors are more likely to show up in only one PCR and at  
36 low copy numbers, which allows them to be filtered out bioinformatically (see below).

37 PCR negative controls were carried out for each PCR set, and the PCR sets that revealed  
38 contamination in the negative controls were redone, or ultimately, abandoned. For each  
39 library, a sample of negative and positive controls were sent for sequencing, in order to  
40 identify contaminants and to determine a minimum read number per OTU. The 20 µL  
41 PCR reactions consisted of 2 µL of 10X buffer, 1.5 mM MgCl<sub>2</sub>, 0.2 mM dNTPs, 0.2 µM per

42 primer, 5% DMSO, 0.6 U ExTaq HotStart DNA polymerase (TAKARA Biosystems, Dalian,  
43 China), and 1  $\mu$ L of template DNA, with a thermal cycling profile of 95 °C for 5 min, then  
44 40 cycles of 95 °C for 30 s, 59 °C for 30 s, and 72 °C for 45 s, with a final extension time of  
45 7 min at 72 °C.

## 46 2 Bioinformatic pipeline and taxonomic assignment

47 *Preprocessing.* We used AdapterRemoval v2.1.7 [32] to remove adapter sequences from  
48 reads and Sickle v1.33 [11] to trim reads of low quality nucleotides. We then used BFC v181  
49 (parameters: `-s 3g -k 25`) [15] to de-noise the reads, and we merged the read pairs with  
50 Pandaseq v2.11 [20]. Except for BFC, we used default parameters.

51 *Demultiplexing and DAME quality filtering.* To filter out tag-jumping events and to remove  
52 artifactual reads arising from PCR or sequencing errors, we used the DAME pipeline [40].  
53 DAME's `sort.py` function was used to remove reads with unused tag combinations, and  
54 the `filter.py` function was used to keep only the haplotypes that appeared in  $\geq 2$  PCRs,  
55 with  $\geq 9$  (LSU) or  $\geq 20$  (SSU) copies per PCR, using the logic that sequences which appear  
56 in multiple, independent PCRs and in multiple copies per PCR are more likely to be true  
57 sequences (`filter.py` parameters for 12S: `-x 3 -y 2 -p 14 -t 20 -l 81`; for 16S: `-x 3`  
58 `-y 2 -p 13 -t 9 -l 82`). Filtering parameters were chosen after inspection of the control  
59 samples.

60 *De novo chimera removal.* DAME filtering also removes the chimeric sequences that can  
61 result from incomplete PCR extension, but we also used the *de novo* chimera detection  
62 function `uchime.denovo` in VSEARCH v2.9.0 [28] to remove any remaining chimeras after  
63 dereplicating with the `derep_fulllength` function.

64 *Clustering into preliminary operational taxonomic units.* We used SWARM v2.0 [19] to  
65 cluster the filtered sequences into preliminary OTUs ('pre-OTUs') and then used the R  
66 package `lulu` v0.1.0 [7] to merge SWARM pre-OTUs that shared high similarity and distribu-  
67 tion across samples (i.e. over-split OTUs) and output a representative sequence for each  
68 pre-OTU. For both, we used default values.

69 *Assigning taxonomy to preliminary operational taxonomic units.* One of the more crucial  
70 steps in the iDNA bioinformatic pipeline is taxonomic assignment. With vertebrates, ex-  
71 act species identity can have important management consequences because some species,  
72 but not their close relatives, are given high conservation value [2]. Existing taxonomic  
73 assignment programs are typically biased toward assigning sequences to species that hap-  
74 pen to be in a reference database, even though we know that some of our leech-derived  
75 sequences are likely from known species that have never been sequenced, or more rarely,  
76 that are undescribed. We thus used PROTAX for taxonomic assignment of the pre-OTU  
77 sequences [33, 34]. PROTAX provides an unbiased, estimated probability of assignment  
78 at each rank, where unbiased means, for example, that 70% of all assignments given  
79 a 70% probability of accuracy are indeed correct. Thus, a PROTAX assignment of a  
80 pre-OTU to `Carnivora(probability=0.999)/Canidae(0.996)/Nyctereutes(0.821)/Nyctereutes`  
81 `procyonoides(0.557)` means that this pre-OTU is very likely to be in the genus *Nyctereutes*,  
82 but there is a  $(1 - 0.557) = 44\%$  probability that the species is not *N. procyonoides*. PRO-  
83 TAX can also estimate the probability that a pre-OTU sequence is 'unknown,' i.e. not in  
84 the reference database. Thus, PROTAX helps prevent mistaken assignments of sequences

85 to species, potentially avoiding wasted management effort directed towards species that are  
86 not actually present.

87 We refer the reader to Somervuo *et al.* [33, 34] for in-depth discussions of PROTAX and to  
88 Axtner *et al.* [2] for details of the bioinformatic pipeline used to create the LSU and SSU  
89 reference databases and to train and assess the PROTAX models. We built the reference  
90 databases starting from the Midori Unique\_20180221\_lrRNA and Unique\_20180221\_srRNA  
91 databases [17], supplemented with mitogenomes from [22]. We used the R package `taxize`  
92 [5] to build a taxonomy database of all Tetrapoda and to harmonize species names between  
93 the Tetrapoda taxonomies and the sequences in the MidoriSalleh reference database, and  
94 we used SATIVA [13] to identify reference sequences mislabelled at family level and above,  
95 which we removed. With the curated reference database, we then trained PROTAX models  
96 for both LSU and SSU, setting a 90% prior probability for the set of Tetrapoda species  
97 known from Ailaoshan, thereby reducing false-positive assignments [27]. Raw similarities  
98 between each query and all reference sequences were calculated with LAST v.982 [12], after  
99 which the trained PROTAX models were used to assign probabilities of assignment for pre-  
100 OTUs at class, order, family, genus, and species ranks. The bioinformatic scripts, reference  
101 datasets, trained models, and bias-accuracy plots are available for download from GitHub  
102 [39].

103 *Using pairwise correlations between SSU and LSU OTUs to reconcile taxonomies.* Dif-  
104 ferent marker genes have different levels of taxonomic coverage and discrimination power  
105 [33, 34], and as a result, the same species can be assigned to different taxonomies by SSU  
106 and LSU. For instance, as described above, the SSU dataset confidently detected *Nyc-*  
107 *tereutes procyonoides*, but the LSU dataset did not, although it did assign one OTU to Car-  
108 *nivora*(probability=0.999)/*Canidae*(0.999)/*Canis*(0.475)/*Vulpes*, unknown species(0.231).  
109 Given the confident assignment to *Canidae*, this LSU OTU might also have derived from  
110 *Nyctereutes*. To combine taxonomic information across the two markers, we therefore cal-  
111 culated pairwise correlations of SSU and LSU pre-OTUs across the 619 replicates for which  
112 both markers had amplified and visualized the correlations as a network (Figure ??). If an  
113 SSU and an LSU pre-OTU occur in the same subset of replicates and are assigned the same  
114 higher-level taxonomies, the two pre-OTUs are likely to have been amplified from the same  
115 set of leeches feeding on the same species. We manually inspected the network diagram and  
116 assigned such correlated pre-OTU pairs the same taxonomy.

117 *Final operational taxonomic units and dataset filtering.* After using PROTAX and then  
118 searching for network correlations, to assign taxonomies to pre-OTUs, we verified that the  
119 positive and negative control samples were free of any substantive contaminants before re-  
120 moving them from the dataset, along with one sample that had neither ranger nor patrol  
121 area information. We eliminated any pre-OTUs to which we were unable to assign a tax-  
122 onomy; these pre-OTUs only accounted for 0.9% and 0.2% of reads in the LSU and SSU  
123 datasets respectively, and most likely represent sequencing errors rather than novel taxa.  
124 Within the LSU and SSU datasets, we merged pre-OTUs that had been assigned the same  
125 taxonomies, thus generating a final set of OTUs for each dataset. Finally, we removed the  
126 OTU identified as *Homo sapiens* from both datasets prior to analysis. As expected, since  
127 the leeches were collected with bare hands and might have in some cases been feeding on  
128 the rangers themselves, human DNA was obtained from the majority of samples in both  
129 datasets.

130 After excluding humans, the final LSU and SSU datasets comprised 18,502,593 and

131 84,951,011 reads respectively. These reads were assigned to a total of 72 OTUs across  
 132 740 replicates and 127 patrol areas in the SSU dataset, and 59 OTUs across 653 replicates  
 133 and 126 patrol areas in the LSU dataset. We attached IUCN data for individual OTUs by  
 134 using the R package `rredlist` v0.5.0 [4] to search for scientific names assigned by PROTAX  
 135 (or synonyms where we were aware of nomenclature changes). For mammalian OTUs, we  
 136 used the PanTHERIA database [10] to obtain data on adult body mass for each OTU; where  
 137 species-level information was not available, we used the median adult body mass from the  
 138 database for the lowest taxonomic group possible.

### 139 3 Site-occupancy modeling

140 *Overview.* We used hierarchical multispecies site-occupancy models [6] to analyze our data.  
 141 The models that we used are an extension of the single-season occupancy model in [18].  
 142 For each species, the models explicitly capture (i) an ‘ecological process’ governing the  
 143 (unobserved) presence or absence of the species in each patrol area; and (ii) an ‘observation  
 144 process’, governing whether we detect the species’ DNA in each of our replicate samples.  
 145 The ecological and observation processes for individual species are linked in our model by  
 146 imposing community-level priors over the parameters that describe the processes for each  
 147 species.

148 We estimated separate models for the LSU and SSU OTU tables. For each dataset, we  
 149 estimated a set of alternative models, summarized in Table S1, specifying different com-  
 150 binations of predictors for the ecological and observation processes. We used the deviance  
 151 information criterion to compare results and select the final models as presented in the main  
 152 text of this paper.

153 *Ecological process.* Each species  $i$  was assumed to be either present or absent in each  
 154 patrol area  $j$ , and we used  $z_{i,j}$  to denote this unobserved ecological state. We assumed the  
 155  $z_{i,j}$  are constant across all replicates taken from patrol area  $j$ , consistent with the samples  
 156 being taken at essentially the same point in time (sometimes referred to as the ‘closure’  
 157 assumption).  $z_{i,j}$  was assumed to be a Bernoulli random variable governed by an occupancy  
 158 parameter  $\psi_{i,j}$ , i.e. the probability that species  $i$  was present in patrol area  $j$ :

$$z_{i,j} \sim \text{Bernoulli}(\psi_{i,j}). \quad (\text{S1})$$

159 We allowed the occupancy probability  $\psi_{i,j}$  to vary among species as well as among patrol  
 160 areas, to capture e.g. preferences of different species for particular habitat types, or interac-  
 161 tions between taxa. In particular, we modelled  $\psi_{i,j}$  as a function of environmental covariates  
 162 that varied over the patrol areas, scaled by species-specific coefficients. Models 1a, 1b and  
 163 1c represented the full ecological model:

$$\text{logit}(\psi_{i,j}) = \beta_{0i} + \beta_{1i} \text{elev}_j + \beta_{2i} \text{TPI}_j + \beta_{3i} \text{road}_j + \beta_{4i} \text{stream}_j + \beta_{5i} \text{reserve}_j \quad (\text{S2})$$

164 where  $\text{elev}_j$ ,  $\text{TPI}_j$ ,  $\text{road}_j$ ,  $\text{stream}_j$  and  $\text{reserve}_j$  are, respectively, the median values of  
 165 elevation, topographic position index, distance to nearest road, distance to nearest stream,  
 166 and the distance from centroid to nature reserve boundary for patrol area  $j$ .

167 Preliminary results indicated that  $\text{elev}$ ,  $\text{reserve}$  and  $\text{road}$  were likely to be the most useful  
 168 occupancy predictors. So, for comparison, we estimated a set of reduced models (2a, 2b and

169 2c) with only these occupancy covariates:

$$\text{logit}(\psi_{i,j}) = \beta_{0i} + \beta_{1i} \text{elev}_j + \beta_{2i} \text{road}_j + \beta_{3i} \text{reserve}_j. \quad (\text{S3})$$

170 The covariates *elev* and *road* were positively correlated ( $r = 0.6$ ), so we additionally esti-  
171 mated a set of models (3a, 3b and 3c) omitting *road*:

$$\text{logit}(\psi_{i,j}) = \beta_{0i} + \beta_{1i} \text{elev}_j + \beta_{2i} \text{reserve}_j \quad (\text{S4})$$

172 and a set of models (4a, 4b and 4c) omitting *elev*:

$$\text{logit}(\psi_{i,j}) = \beta_{0i} + \beta_{1i} \text{road}_j + \beta_{2i} \text{reserve}_j. \quad (\text{S5})$$

173 *Observation process.* Although we cannot directly observe the true ecological state  $z_{i,j}$ ,  
174 we do know whether we detected DNA from species  $i$  in each replicate  $k$  from patrol area  
175  $j$ . But this is an imperfect proxy for the true ecological state. For replicate  $k$  from patrol  
176 area  $j$ , we assumed that we detected DNA from species  $i$  with probability  $p_{i,j,k}$  when  $i$  was  
177 truly present in patrol area  $j$ , and with probability 0 when  $i$  was absent:

$$y_{i,j,k} \sim \text{Bernoulli}(z_{i,j} \cdot p_{i,j,k}), \quad (\text{S6})$$

178 where the  $y_{i,j,k}$  are the observed data (i.e. detection or non-detection of species  $i$ 's DNA  
179 in each replicate). Our model therefore assumes that false positives do not occur, i.e. that

**Table S1:** Summary of model specifications tested. *elev* = median elevation; *TPI* = median topographic position index; *road* = median distance to nearest road; *stream* = median distance to nearest stream; *reserve* = distance from centroid to nature reserve boundary; *numleeches* = number of leeches in replicate; *othertaxa* = number of other taxa detected in replicate; *human* = fraction of reads from replicate assigned to *Homo sapiens*

| Model | Occupancy covariates                                                    | Detection covariates                 |
|-------|-------------------------------------------------------------------------|--------------------------------------|
| 1a    | <i>elev</i> + <i>TPI</i> + <i>road</i> + <i>stream</i> + <i>reserve</i> | <i>numleeches</i>                    |
| 1b    | <i>elev</i> + <i>TPI</i> + <i>road</i> + <i>stream</i> + <i>reserve</i> | <i>numleeches</i> + <i>othertaxa</i> |
| 1c    | <i>elev</i> + <i>TPI</i> + <i>road</i> + <i>stream</i> + <i>reserve</i> | <i>numleeches</i> + <i>human</i>     |
| 2a    | <i>elev</i> + <i>road</i> + <i>reserve</i>                              | <i>numleeches</i>                    |
| 2b    | <i>elev</i> + <i>road</i> + <i>reserve</i>                              | <i>numleeches</i> + <i>othertaxa</i> |
| 2c    | <i>elev</i> + <i>road</i> + <i>reserve</i>                              | <i>numleeches</i> + <i>human</i>     |
| 3a    | <i>elev</i> + <i>reserve</i>                                            | <i>numleeches</i>                    |
| 3b    | <i>elev</i> + <i>reserve</i>                                            | <i>numleeches</i> + <i>othertaxa</i> |
| 3c    | <i>elev</i> + <i>reserve</i>                                            | <i>numleeches</i> + <i>human</i>     |
| 4a    | <i>road</i> + <i>reserve</i>                                            | <i>numleeches</i>                    |
| 4b    | <i>road</i> + <i>reserve</i>                                            | <i>numleeches</i> + <i>othertaxa</i> |
| 4c    | <i>road</i> + <i>reserve</i>                                            | <i>numleeches</i> + <i>human</i>     |

180 we never falsely detect species  $i$ 's DNA through lab contamination or through incorrectly  
 181 assigned sequence reads. On the other hand, since  $p_{i,j,k}$  may be less than one, it allows for  
 182 the possibility of false negatives, i.e. that we failed to detect species  $i$ 's DNA when species  
 183  $i$  was actually present. Although false positives probably do occur, we focused mainly on  
 184 lab procedures and the taxonomic assignment pipeline to address these, and we expect false  
 185 negatives to far outstrip false positives in our final datasets.

186 We allowed the conditional detection probability  $p_{i,j,k}$  to vary among species, to capture  
 187 e.g. variation in leech feeding preferences for different taxa, as well as among replicates, to  
 188 capture e.g. technical differences that might affect the probability of detecting taxa. The ob-  
 189 served data clearly showed that the number of leeches included in a replicate was positively  
 190 related to the number of taxa detected (see Figure S4b). Our baseline detection model there-  
 191 fore used the number of leeches in replicate  $k$  from patrol area  $j$ , denoted  $numleeches_{j,k}$ ,  
 192 as a predictor for the detection probability for each species  $i$  in that replicate:

$$logit(p_{i,j,k}) = \gamma_{0i} + \gamma_{1i}numleeches_{j,k}, \quad (S7)$$

193 and we used this observation model in conjunction with each of the ecological models in  
 194 Equations S2 through S5 (i.e. models 1a, 2a, 3a and 4a).

195 We also estimated two other variants of the observation model. First, to test the idea  
 196 proposed in [1] that the detection probability for species  $i$  may be lowered in the presence  
 197 of DNA from other species, we calculated  $othertaxa_{i,j,k}$  as the number of species other  
 198 than  $i$  detected in replicate  $k$  from patrol area  $j$ . We used this along with  $numleeches$  to  
 199 model detection probability, and used this observation model in conjunction with each of  
 200 the ecological models in Equations S2 through S5 (i.e. models 1b, 2b, 3b and 4b):

$$logit(p_{i,j,k}) = \gamma_{0i} + \gamma_{1i}numleeches_{j,k} + \gamma_{2i}othertaxa_{i,j,k}. \quad (S8)$$

201 Second, along similar lines, we examined the possibility that the detection probability for  
 202 species  $i$  may be lowered in the presence of human DNA, which in some replicates accounted  
 203 for the majority of reads. We therefore calculated  $human_{j,k}$  as the fraction of reads assigned  
 204 to *Homosapiens* in replicate  $k$  from patrol area  $j$  after all filtering steps in our bioinformatic  
 205 pipeline. We used this along with  $numleeches$  to model detection probability, and used this  
 206 observation model in conjunction with each of the ecological models in Equations S2 through  
 207 S5 (i.e. models 1c, 2c, 3c and 4c):

$$logit(p_{i,j,k}) = \gamma_{0i} + \gamma_{1i}numleeches_{j,k} + \gamma_{2i}human_{j,k}. \quad (S9)$$

208 *Community model.* Equations (S1) through (S9) define a set of 12 site-occupancy models  
 209 for each species  $i$  with alternative specifications for modelling the ecological and observation  
 210 processes (summarized in Table S1). For each of these 12 alternative model specifications,  
 211 we united the species-specific models with community models for both ecological and ob-  
 212 servation processes. Specifically, we assumed that the species-level  $\beta$  and  $\gamma$  parameters are  
 213 distributed according to distributions described by a set of community-level hyperparam-  
 214 eters:

$$\beta_{mi} \sim N(\mu_{\beta_m}, \sigma_{\beta_m}) \quad m = 1, 2, \dots \quad (S10)$$

$$\gamma_{ni} \sim N(\mu_{\gamma_n}, \sigma_{\gamma_n}) \quad n = 1, \dots \quad (S11)$$

$$(\beta_{0i}, \gamma_{0i}) \sim MVN([\mu_{\beta_0}, \mu_{\gamma_0}], [\sigma_{\beta_0}, \sigma_{\gamma_0}]) \quad (S12)$$

215 where  $N(\cdot)$  and  $MVN(\cdot)$  denote normal and multivariate normal distributions, with  
216 community-level hyperparameters  $\mu_{\bullet}$  and  $\sigma_{\bullet}$ . That is, for each model specification,  $m$   
217 and  $n$  vary so that there is a distribution described by Equations S10 or S11 for each  
218 predictor. We used a multivariate normal prior for  $(\beta_{0i}, \gamma_{0i})$  to allow non-zero covariance  
219 between species' occupancy and detection probabilities, as we might expect if, for exam-  
220 ple, variation in abundance affects both probabilities [6]. These community models allow  
221 rare species effectively to borrow information from more common ones, producing a better  
222 overall ensemble of parameter estimates [6, 16, 29].

223 Incompletely labelled data points (i.e. sequence data without records of which patrol areas  
224 they came from) were retained in the model by including these data points without accom-  
225 panying environmental covariates. Since the identity of the collecting ranger was known  
226 and could be used to identify replicates that came from the same unknown location, this  
227 allowed these data to contribute to both detection and occupancy estimates. At the same  
228 time, we generated occupancy estimates for patrol areas without accompanying data by  
229 augmenting the data matrix with rows of missing values and including their environmental  
230 covariates.

231 We normalized all predictors to a mean of 0 and a standard deviation of 1 prior to modelling.  
232 We estimated all model variants in a Bayesian framework with JAGS v4.3.0 [23] in R v3.5.1  
233 [25] via `rjags` v4.8 [24] and `R2jags` v0.5-7 [37]. We used uninformative diffuse priors  
234 for all parameters and hyperparameters. We ran each model with three chains of 40,000  
235 generations and a burn-in of 10,000, thinning results by a factor of 20. From the retained  
236 results we calculated means for all model parameters of interest, as well as estimated species  
237 richness for each patrol area. We assessed convergence by inspecting the  $\hat{R}$  statistic [8, 3],  
238 and calculated 95% credible intervals from the 2.5% and 97.5% percentiles of the posterior  
239 distribution.

240 *Comparing model results.* We used the deviance information criterion (DIC) [36] to com-  
241 pare the 12 model variants against one another for each dataset. This computationally  
242 straightforward approach is known to have limitations, both in general and for occupancy  
243 models in particular [35, 9], but there is a lack of consensus on superior methods, and our  
244 conclusions, in any case, are unlikely to hinge on the choice of specification.

245 We used `AICcmoDavg:DIC` in R [21] to calculate DIC for each model, and ranked models  
246 accordingly (Table S2). In both datasets, model 3a (occupancy covariates *elev* and *reserve*;  
247 detection covariate *numleeches*) was the best ranked model. We therefore report results  
248 from this model specification in the paper. However, models 4a and 2a also performed  
249 reasonably well, and in any extension of this work it would be worth considering whether  
250 there is value in including *road* as a predictor in addition to, or instead of *elev*.

**Table S2:** DIC results. Models are ordered according to DIC within each dataset, with the best models first. pD = effective number of estimated parameters for each model; DIC = deviance information criterion;  $\Delta$ DIC = difference in DIC compared to top-ranked model.

| (a) LSU dataset |      |        |              | (a) SSU dataset |      |        |              |
|-----------------|------|--------|--------------|-----------------|------|--------|--------------|
| Model           | pD   | DIC    | $\Delta$ DIC | Model           | pD   | DIC    | $\Delta$ DIC |
| 3a              | 2504 | 9706   | 0            | 3a              | 2947 | 13620  | 0            |
| 4a              | 2595 | 9877   | 171          | 4a              | 3080 | 13749  | 129          |
| 2a              | 2621 | 10317  | 611          | 2a              | 3024 | 14204  | 583          |
| 1a              | 2594 | 11297  | 1590         | 1a              | 3734 | 15918  | 2298         |
| 2c              | 2377 | 11842  | 2135         | 4c              | 3339 | 15992  | 2372         |
| 3c              | 3035 | 12018  | 2312         | 3c              | 3426 | 16110  | 2489         |
| 4c              | 3109 | 12119  | 2412         | 2c              | 3470 | 16673  | 3053         |
| 1c              | 1922 | 12376  | 2670         | 1c              | 3186 | 17385  | 3765         |
| 3b              | 2637 | 119096 | 109390       | 2b              | 3131 | 165447 | 151827       |
| 2b              | 2552 | 119515 | 109809       | 3b              | 3700 | 165509 | 151889       |
| 4b              | 3729 | 120262 | 110555       | 4b              | 3977 | 165800 | 152180       |
| 1b              | 2705 | 120678 | 110972       | 1b              | 3083 | 166392 | 152772       |



## 251 References

- 252 [1] J. F. Abrams, L. Hörig, R. Brozovic, J. Axtner, A. Crampton-Platt, A. Mohamed,  
253 et al. “Shifting up a gear with iDNA: from mammal detection events to standardized  
254 surveys”. *Journal of Applied Ecology* 18.3 (2019), pp. 511–512.
- 255 [2] J. Axtner, A. Crampton-Platt, L. A. Hörig, A. Mohamed, C. C. Y. Xu, D. W. Yu,  
256 et al. “An efficient and robust laboratory workflow and tetrapod database for larger  
257 scale environmental DNA studies”. *GigaScience* 8.4 (Apr. 2019), pp. 646–17.
- 258 [3] S. P. Brooks and A. Gelman. “General Methods for Monitoring Convergence of It-  
259 erative Simulations”. *Journal of Computational and Graphical Statistics* 7.4 (1998),  
260 pp. 434–455. DOI: 10.1080/10618600.1998.10474787.
- 261 [4] S. Chamberlain. *rredlist: ‘IUCN’ Red List Client*. R package version 0.5.0. 2018. URL:  
262 <https://CRAN.R-project.org/package=rredlist>.
- 263 [5] S. Chamberlain, E. Szoecs, Z. Foster, Z. Arendsee, C. Boettiger, K. Ram, et al. *taxize:*  
264 *Taxonomic information from around the web*. R package version 0.9.7. 2019. URL:  
265 <https://github.com/ropensci/taxize>.
- 266 [6] R. M. Dorazio, J. A. Royle, B. Soderstrom, and A. Glimskar. “Estimating species  
267 richness and accumulation by modeling species occurrence and detectability”. *Ecology*  
268 87.4 (2006), pp. 842–854. DOI: 10.1890/0012-9658(2006)87[842:Esraab]2.0.Co;2.
- 269 [7] T. G. Frøslev, R. Kjøller, H. H. Bruun, R. Ejrnæs, A. K. Brunbjerg, C. Pietroni,  
270 et al. “Algorithm for post-clustering curation of DNA amplicon data yields reliable  
271 biodiversity estimates”. *Nature Communications* 8 (2017). DOI: 10.1038/s41467-  
272 017-01312-x.
- 273 [8] A. Gelman and D. B. Rubin. “Inference from Iterative Simulation Using Multiple  
274 Sequences”. *Statistical Science* 7.4 (1992), pp. 457–472. DOI: 10.1214/ss/1177011136.
- 275 [9] M. B. Hooten and N. T. Hobbs. “A guide to Bayesian model selection for ecologists”.  
276 *Ecological Monographs* 85.1 (2015), pp. 3–28. DOI: 10.1890/14-0661.1.
- 277 [10] K. E. Jones, J. Bielby, M. Cardillo, S. A. Fritz, J. O’Dell, C. D. L. Orme, et al.  
278 “PanTHERIA: a species-level database of life history, ecology, and geography of extant  
279 and recently extinct mammals”. *Ecology* 90.9 (2009), pp. 2648–2648. DOI: 10.1890/  
280 08-1494.1.
- 281 [11] J. N. Joshi and N. A. Fass. *Sickle: a sliding-window, adaptive, quality-based trimming*  
282 *tool for FastQ files (version 1.33)*. 2011. URL: <https://github.com/najoshi/sickle>.
- 283 [12] S. M. Kielbasa, R. Wan, K. Sato, P. Horton, and M. C. Frith. “Adaptive seeds tame  
284 genomic sequence comparison”. *Genome Research* 21.3 (Mar. 2011), pp. 487–493.
- 285 [13] A. M. Kozlov, J. Zhang, P. Yilmaz, F. O. Glöckner, and A. Stamatakis. “Phylogeny-  
286 aware identification and correction of taxonomically mislabeled sequences”. *Nucleic*  
287 *Acids Research* 44.11 (June 2016), pp. 5022–5033.
- 288 [14] M. Leray, J. Y. Yang, C. P. Meyer, S. C. Mills, N. Agudelo, V. Ranwez, et al. “A new  
289 versatile primer set targeting a short fragment of the mitochondrial COI region for  
290 metabarcoding metazoan diversity: application for characterizing coral reef fish gut  
291 contents”. *Frontiers in Zoology* 10 (June 2013), p. 34.
- 292 [15] H. Li. “BFC: correcting Illumina sequencing errors”. *Bioinformatics* 31.17 (Sept.  
293 2015), pp. 2885–2887.

- 294 [16] W. A. Link and J. R. Sauer. “Extremes in Ecology: Avoiding the Misleading Effects of  
295 Sampling Variation in Summary Analyses”. *Ecology* 77.5 (1996), pp. 1633–1640. DOI:  
296 10.2307/2265557.
- 297 [17] R. J. Machida, M. Leray, S.-L. Ho, and N. Knowlton. “Metazoan mitochondrial gene  
298 sequence reference datasets for taxonomic assignment of environmental samples”. *Sci-  
299 entific Data* 4 (2017), p. 170027. DOI: 10.1038/sdata.2017.27. Data downloaded  
300 from <http://www.reference-midori.info/download.php> on 9 August 2019.
- 301 [18] D. I. MacKenzie, J. D. Nichols, G. B. Lachman, S. Droege, J. A. Royle, and C. A.  
302 Langtimm. “Estimating site occupancy rates when detection probabilities are less than  
303 one”. *Ecology* 83.8 (2002), pp. 2248–2255.
- 304 [19] F. Mahe, T. Rognes, C. Quince, C. de Vargas, and M. Dunthorn. “Swarm v2: highly-  
305 scalable and high-resolution amplicon clustering”. *PeerJ* 3 (2015). DOI: 10.7717/  
306 peerj.1420.
- 307 [20] A. P. Masella, A. K. Bartram, J. M. Truszkowski, D. G. Brown, and J. D. Neufeld.  
308 “PANDAsseq: paired-end assembler for illumina sequences”. *BMC Bioinformatics* 13.1  
309 (Nov. 2012), pp. 1–7.
- 310 [21] M. J. Mazerolle. *AICcmodavg: Model selection and multimodel inference based on  
311 (Q)AIC(c)*. R package version 2.2-2. 2019. URL: [https://cran.r-project.org/  
312 package=AICcmodavg](https://cran.r-project.org/package=AICcmodavg).
- 313 [22] F. Mohd Salleh, J. Ramos-Madrigal, F. Peñaloza, S. Liu, S. S. Mikkil-Holger, P. P.  
314 Riddhi, et al. “An expanded mammal mitogenome dataset from Southeast Asia”.  
315 *GigaScience* 6.8 (Aug. 2017), pp. 1–8.
- 316 [23] M. Plummer. *JAGS: A program for analysis of Bayesian graphical models using Gibbs  
317 sampling*. Computer Program. Version 4.3.0. 2017. URL: [https://sourceforge.net/  
318 projects/mcmc-jags](https://sourceforge.net/projects/mcmc-jags).
- 319 [24] M. Plummer. *rjags: Bayesian graphical models using MCMC*. Computer Program. R  
320 package version 4.8. 2018. URL: <https://CRAN.R-project.org/package=rjags>.
- 321 [25] R Core Team. *R: A Language and Environment for Statistical Computing*. R Foun-  
322 dation for Statistical Computing. Vienna, Austria, 2019. URL: [https://www.R-  
323 project.org/](https://www.R-project.org/).
- 324 [26] T. Riaz, W. Shehzad, A. Viari, F. Pompanon, P. Taberlet, and E. Coissac. “ecoPrimers:  
325 inference of new DNA barcode markers from whole genome sequence analysis”. *Nucleic  
326 Acids Research* 39.21 (Sept. 2011), e145–e145. DOI: 10.1093/nar/gkr732.
- 327 [27] T. W. Rodgers, C. C. Y. Xu, J. Giacalone, K. M. Kapheim, K. Saltonstall, M. Vargas,  
328 et al. “Carrion fly-derived DNA metabarcoding is an effective tool for mammal surveys:  
329 Evidence from a known tropical mammal community”. *Molecular Ecology Resources*  
330 17.6 (Nov. 2017), e133–e145.
- 331 [28] T. Rognes, T. Flouris, B. Nichols, C. Quince, and F. Mahé. “VSEARCH: a versatile  
332 open source tool for metagenomics”. *PeerJ* 4 (2016), e2584.
- 333 [29] D. B. Rubin. “Bayesianly Justifiable and Relevant Frequency Calculations for the  
334 Applied Statistician”. *The Annals of Statistics* 12.4 (1984), pp. 1151–1172.
- 335 [30] I. B. Schnell, K. Bohmann, and M. T. P. Gilbert. “Tag jumps illuminated – reducing  
336 sequence-to-sample misidentifications in metabarcoding studies”. *Molecular Ecology  
337 Resources* 15.6 (2015), pp. 1289–1303. DOI: 10.1111/1755-0998.12402.

- 338 [31] I. B. Schnell, P. F. Thomsen, N. Wilkinson, M. Rasmussen, L. R. Jensen, E. Willerslev,  
339 et al. “Screening mammal biodiversity using DNA from leeches”. *Current Biology* 22.8  
340 (2012), R262–R263. DOI: 10.1016/j.cub.2012.02.058.
- 341 [32] M. Schubert, S. Lindgreen, and L. Orlando. “AdapterRemoval v2: rapid adapter trim-  
342 ming, identification, and read merging”. *BMC Research Notes* 9 (Feb. 2016), p. 88.
- 343 [33] P. Somervuo, S. Koskela, J. Pennanen, R. H. Nilsson, and O. Ovaskainen. “Unbi-  
344 ased probabilistic taxonomic classification for DNA barcoding”. *Bioinformatics* 32.19  
345 (2016), pp. 2920–2927. DOI: 10.1093/bioinformatics/btw346.
- 346 [34] P. Somervuo, D. W. Yu, C. C. Y. Xu, Y. Q. Ji, J. Hultman, H. Wirta, et al. “Quan-  
347 tifying uncertainty of taxonomic placement in DNA barcoding and metabarcoding”.  
348 *Methods in Ecology and Evolution* 8.4 (2017), pp. 398–407. DOI: 10.1111/2041-  
349 210x.12721.
- 350 [35] D. J. Spiegelhalter, N. G. Best, B. P. Carlin, and A. van der Linde. “The deviance  
351 information criterion: 12 years on”. *Journal of the Royal Statistical Society: Series B*  
352 (*Statistical Methodology*) 76.3 (2014), pp. 485–493. DOI: 10.1111/rssb.12062.
- 353 [36] D. J. Spiegelhalter, N. G. Best, B. P. Carlin, and A. Van Der Linde. “Bayesian mea-  
354 sures of model complexity and fit”. *Journal of the Royal Statistical Society: Series B*  
355 (*Statistical Methodology*) 64.4 (2002), pp. 583–639. DOI: 10.1111/1467-9868.00353.
- 356 [37] Y.-S. Su and M. Yajima. *R2jags: Using R to Run ‘JAGS’*. Computer Program. R  
357 package version 0.5-7. 2015. URL: <https://CRAN.R-project.org/package=R2jags>.
- 358 [38] P. G. Taylor. “Reproducibility of ancient DNA sequences from extinct Pleistocene  
359 fauna”. *Molecular Biology and Evolution* 13.1 (Jan. 1996), pp. 283–285.
- 360 [39] D. Yu. *Ailaoshan version with unweighted and weighted PROTAX and MIDORI*  
361 *1.2*. 2020. URL: [https://github.com/dougwyu/screenforbio-mbc-ailaoshan/](https://github.com/dougwyu/screenforbio-mbc-ailaoshan/releases/tag/1.3)  
362 [releases/tag/1.3](https://github.com/dougwyu/screenforbio-mbc-ailaoshan/releases/tag/1.3).
- 363 [40] M. L. Zepeda-Mendoza, K. Bohmann, A. Carmona Baez, and M. T. Gilbert. “DAMe:  
364 a toolkit for the initial processing of datasets with PCR replicates of double-tagged  
365 amplicons for DNA metabarcoding analyses”. *BMC Research Notes* 9 (2016), p. 255.  
366 DOI: 10.1186/s13104-016-2064-9. Downloaded 9 August 2019 from forked version  
367 at <https://github.com/shyamsg/DAMe>.
